# Supplementary material
Source: publisher figshare collection journal article supplement (https://acs.figshare.com/ndownloader/files/4554616)
Supplement: Supplementary file 1 [file 4554616]

**Intramolecular Hydrogen Bond-controlled Prolyl Amide Isomerization in Glucosyl 3(*S*)-hydroxy-5'-hydroxymethyl Proline Hybrids – The Influence of a C-5'-hydroxymethyl Substituent on the Thermodynamics and Kinetics of Prolyl Amide Cis/Trans Isomerization.**

Kaidong Zhang<sup>†</sup>, Robel B. Teklebrhan<sup>†</sup>, George Schreckenbach<sup>†</sup>, Stacey Wetmore<sup>‡</sup> and Frank Schweizer<sup>†,\*</sup>

<sup>†</sup>*Department of Chemistry, University of Manitoba, Winnipeg, Manitoba R3T 2N2 Canada*

<sup>‡</sup>*Department of Chemistry & Biochemistry, University of Lethbridge, Lethbridge, Alberta T1K 3M4 Canada*

*\*schweize@cc.umanitoba.ca*

Table of Contents

|                                                                                                                                                                             |       |
|-----------------------------------------------------------------------------------------------------------------------------------------------------------------------------|-------|
| Title Page                                                                                                                                                                  | SI-1  |
| General                                                                                                                                                                     | SI-2  |
| Synthetic procedure for compounds <b>7</b> and <b>8</b>                                                                                                                     | SI-2  |
| <sup>1</sup> H NMR and <sup>13</sup> C NMR for Compounds <b>3</b> , <b>4</b> , <b>5</b> , <b>6</b> , <b>7</b> , <b>8</b>                                                    | SI-3  |
| Assignment of <i>cis</i> and <i>trans</i> rotamers of compounds <b>3</b> and <b>4</b> through 1D nOe experiments and chemical shift of $\alpha$ -carbon of pyrrolidine ring | SI-9  |
| Magnetization transfer NMR experiments                                                                                                                                      | SI-19 |
| Table of thermodynamic data and relative equations                                                                                                                          | SI-43 |
| FT-IR experiment                                                                                                                                                            | SI-44 |
| Temperature coefficient experiments                                                                                                                                         | SI-45 |
| DFT computational methods                                                                                                                                                   | SI-47 |

## Experimental Procedure

### General

$^1\text{H}$  and  $^{13}\text{C}$  NMR spectra were taken in  $\text{CD}_3\text{OD}$ ,  $\text{D}_2\text{O}$  at 500 MHz and 75 MHz NMR spectrometer, respectively. 1D NOE experiments (40ms gaussian pulse with a 560ms mixing time) and HSQC experiments were performed at 500 MHz NMR spectrometer. The data from Inversion-Magnetization Transfer experiment were processed by Mathematica 5.0. Analytical thin layer chromatography was performed on 0.20 mm silica gel 60 Å plates. Flash chromatography was performed on 40-63  $\mu\text{m}$  60 Å silica gel.

### Synthetic procedure for compounds 7 and 8

**(1S)-2,3,4,6-Tetrahydroxy-1'-N-acetyl-5'(S)-hydroxymethylene-spiro[1,5-anhydro-D-glucitol-1,3'-L-proline methylamide] (7).** Compound **3** (25 mg, 0.07 mmol) was dissolved in a solution of methylamine in absolute ethanol (4 mL, 33% wt) and stirred for 18 hours at room temperature. The mixture was concentrated and purified by the flash column chromatography (dichloromethane/methanol: 2/1) to get compound **7** as a colorless oil (23 mg, 95%)

**(1S)-2,3,4,6-Tetrahydroxy-1'-N-acetyl-5'(R)-hydroxymethylene-spiro[1,5-anhydro-D-glucitol-1,3'-L-proline methylamide] (8).** Compound **4** (30 mg, 0.09 mmol) was dissolved in a solution of methylamine in absolute ethanol (4.5 mL, 33% wt) and stirred for 18 hours at room temperature. The mixture was concentrated and purified by the flash column chromatography (dichloromethane/methanol: 2/1) to get compound **8** as a colorless oil (28 mg, 93%)

**$^1\text{H}$  and  $^{13}\text{C}$  NMR Spectra for compound 3-8 in  $\text{D}_2\text{O}$** **Compound 3**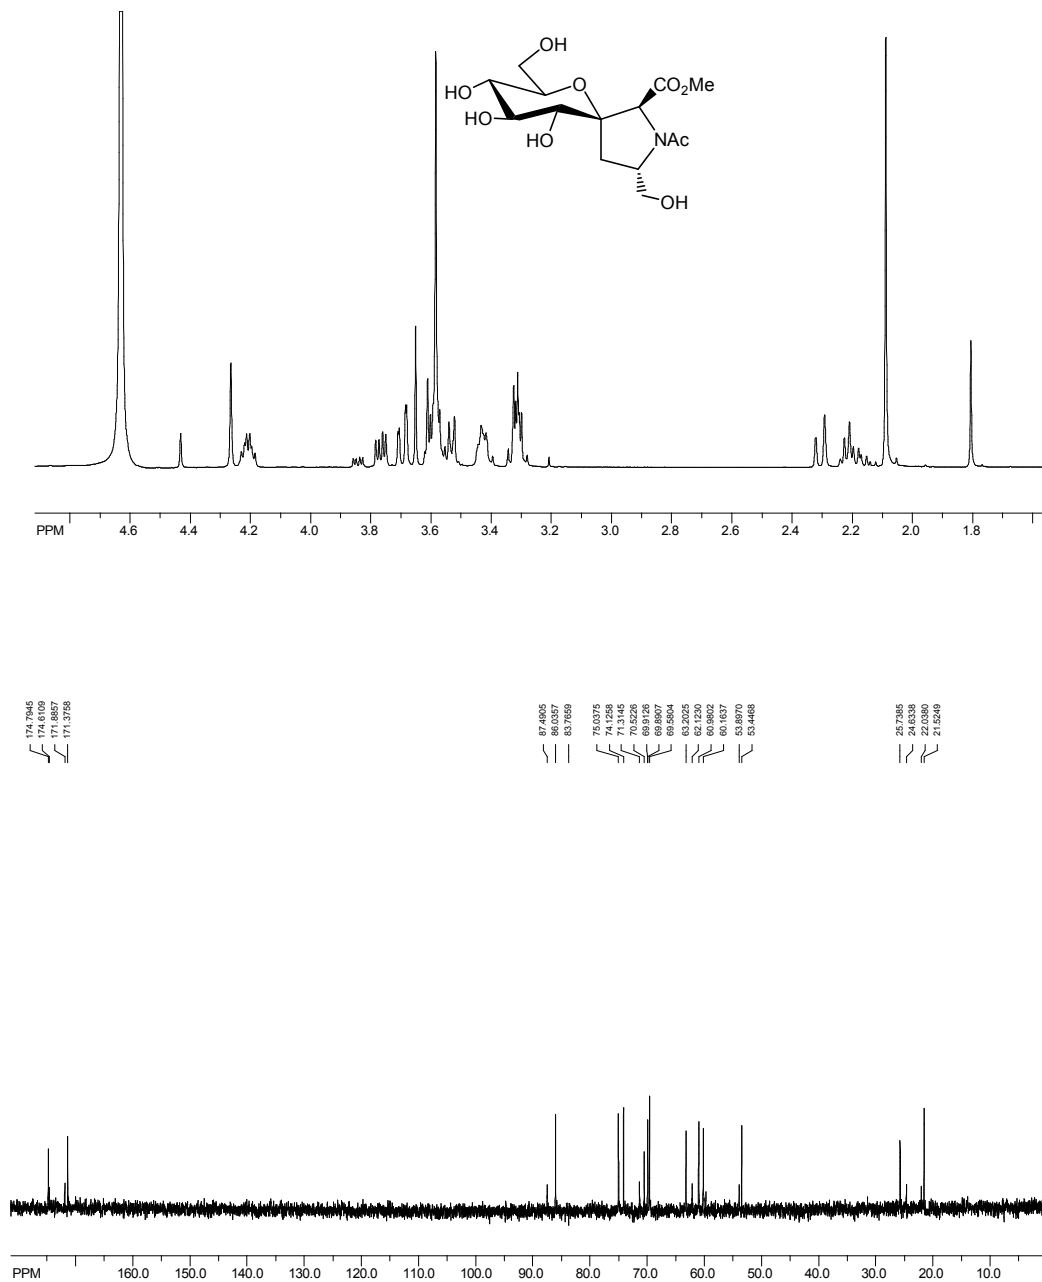

## Compound 4

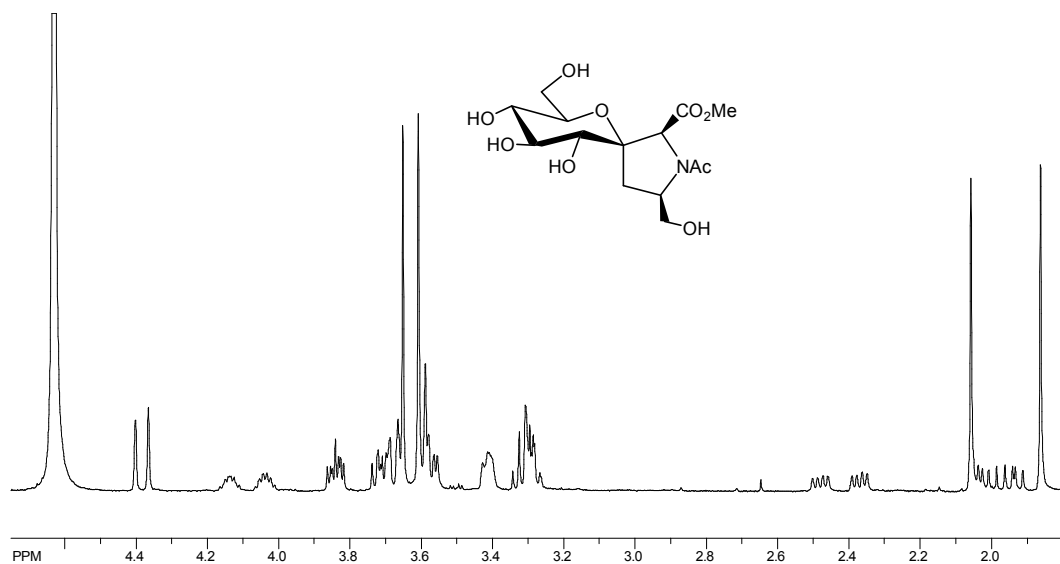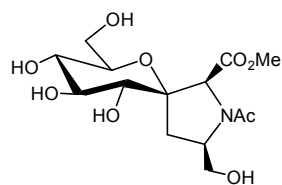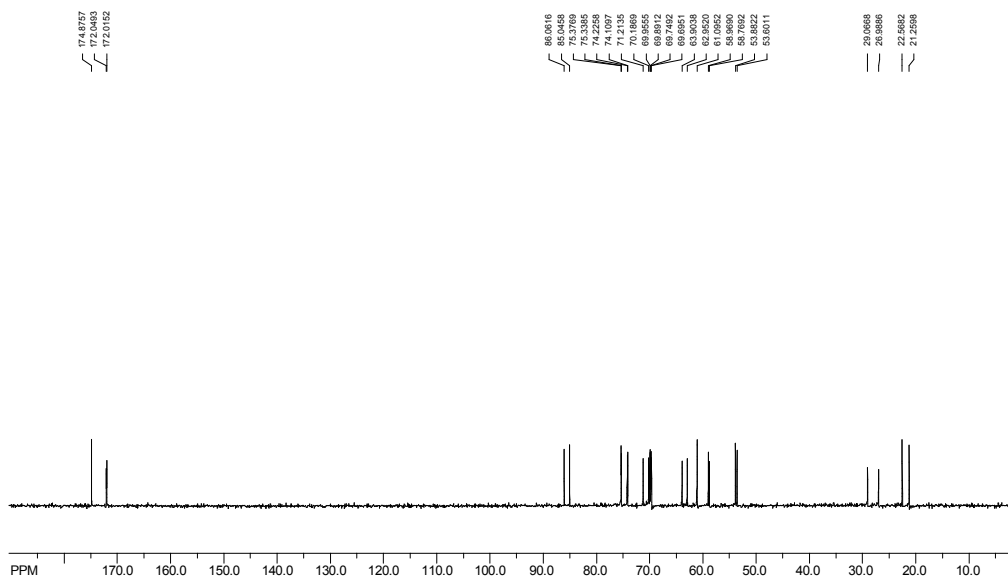

Compound **5**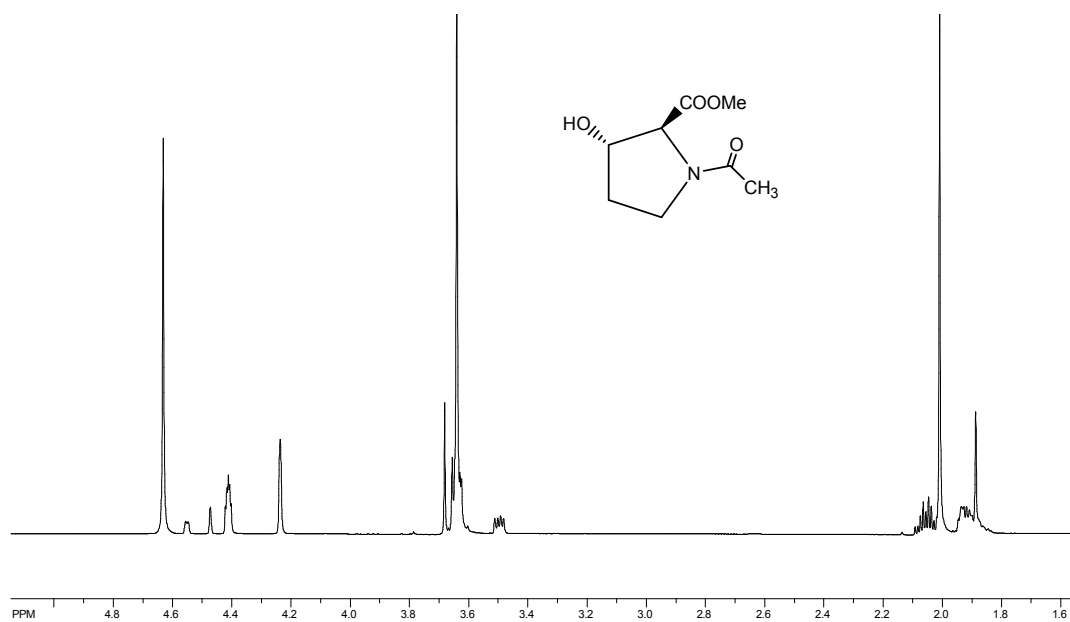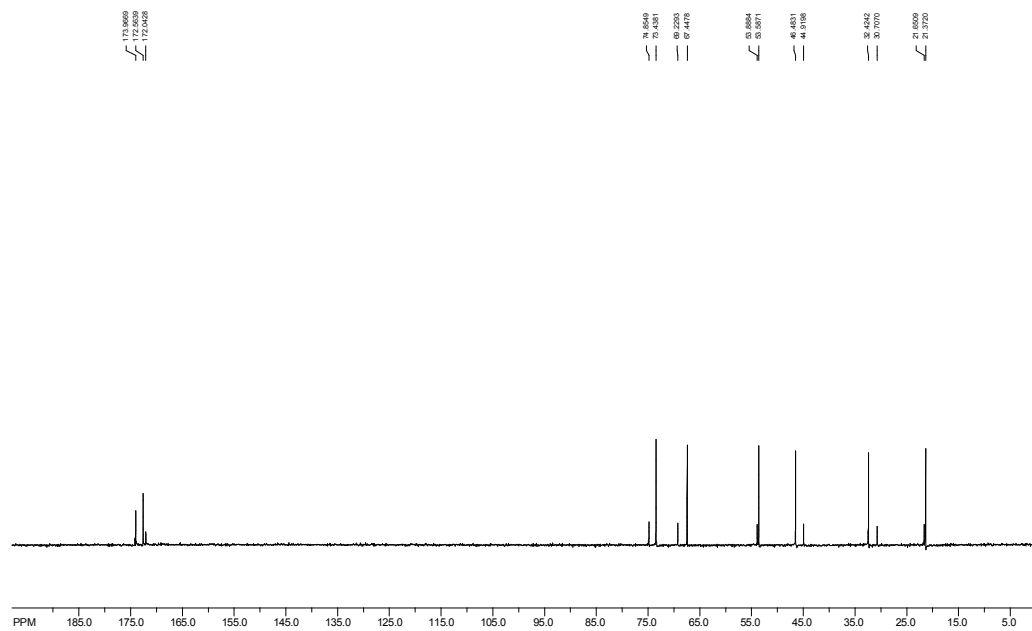

## Compound 6

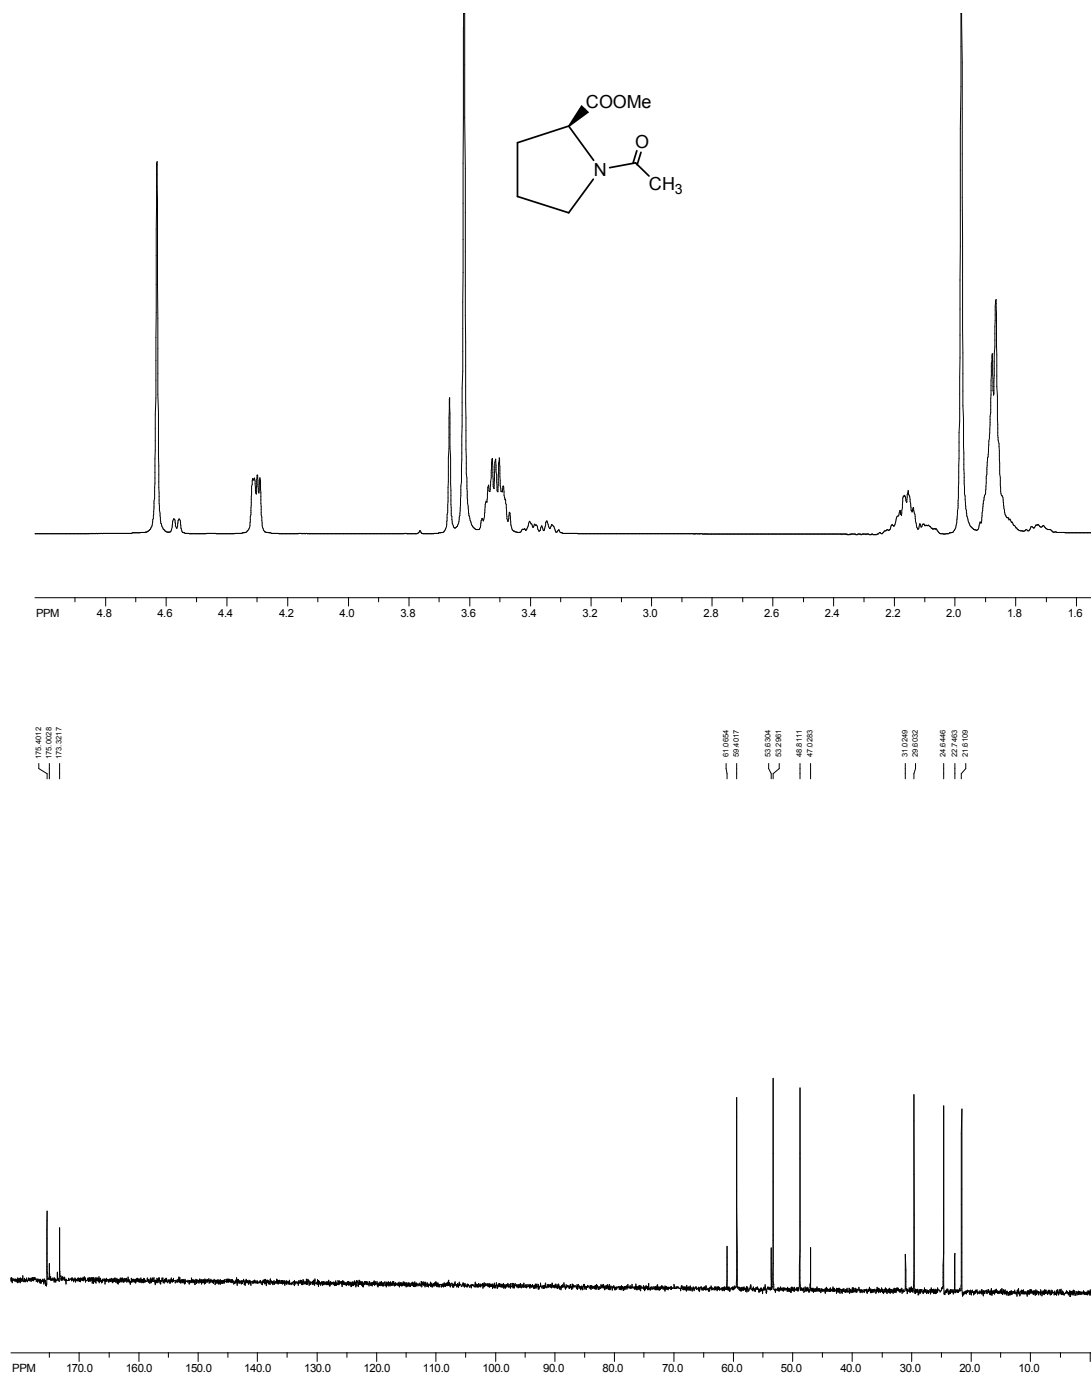

## Compound 7

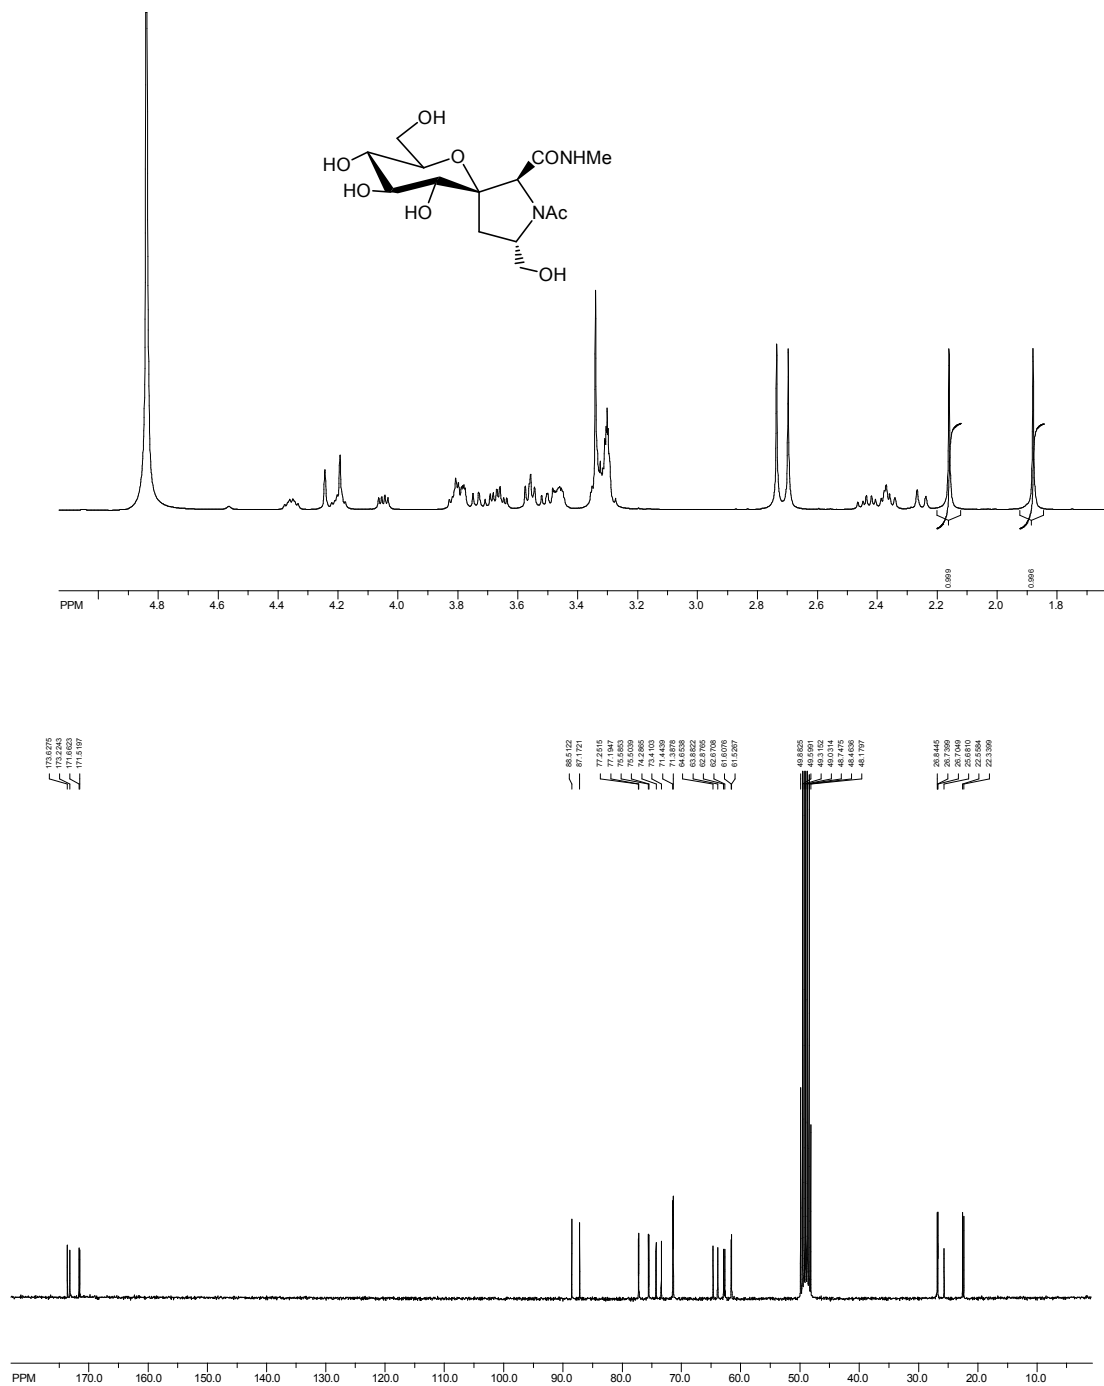

## Compound 8

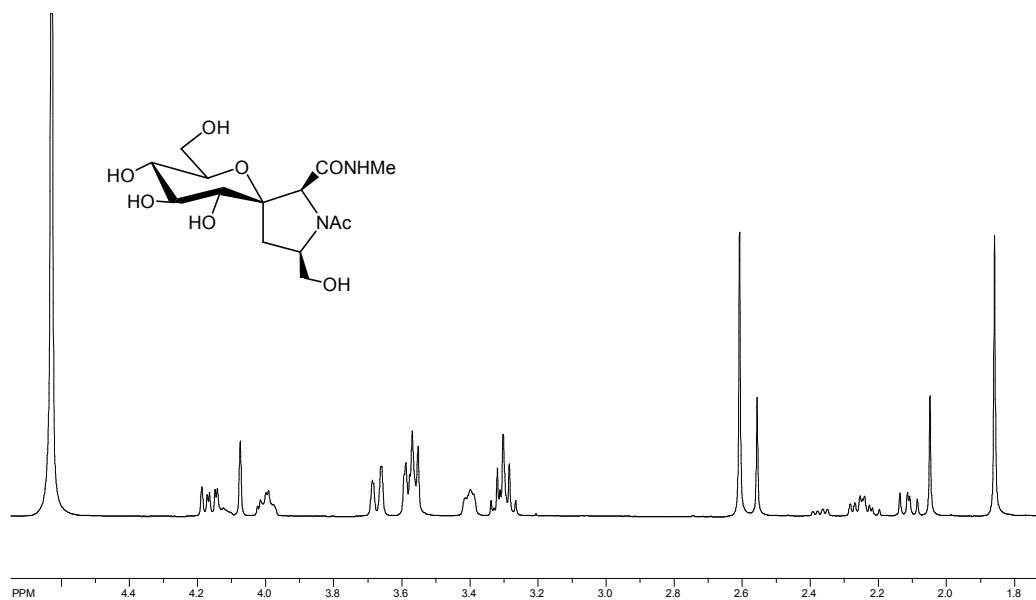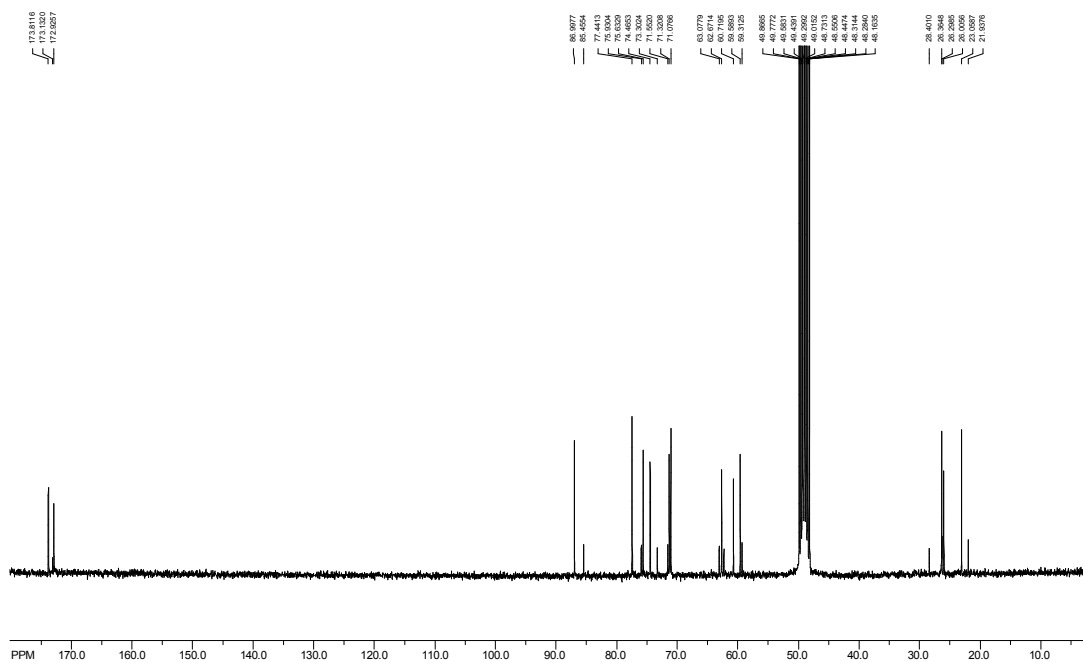



# Assignment of *cis* and *trans* rotamers of compounds 3, 4, 7 and 8 through 1D nOe Experiments

Compound 3 in CD<sub>3</sub>OD

<sup>1</sup>H NMR spectrum

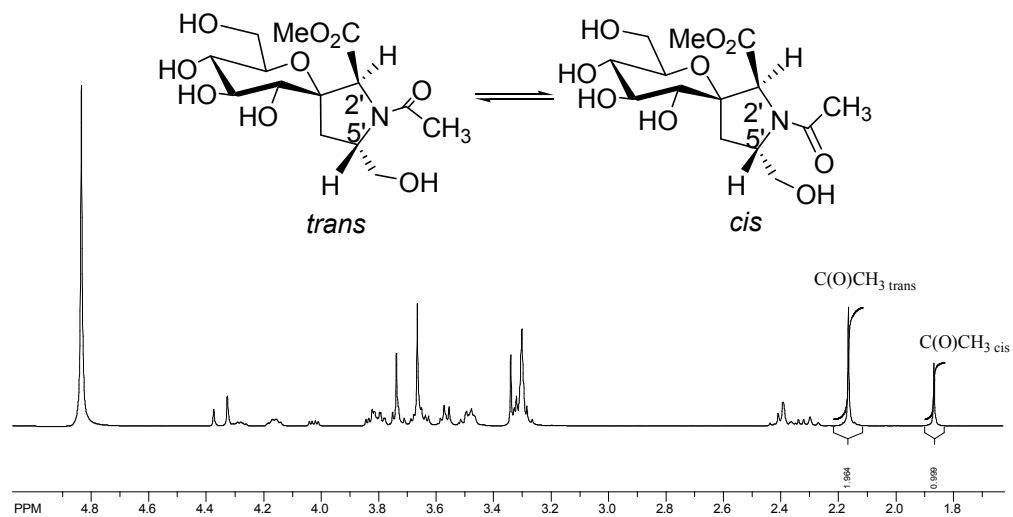

1D nOe spectrum

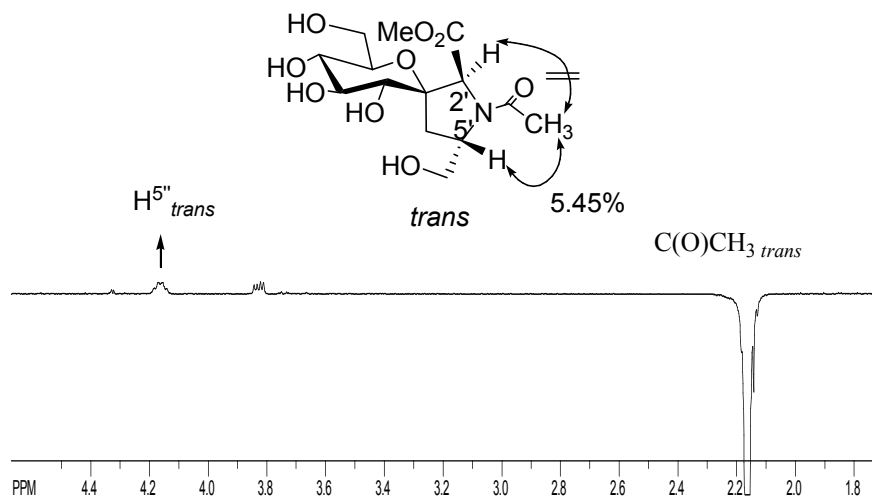

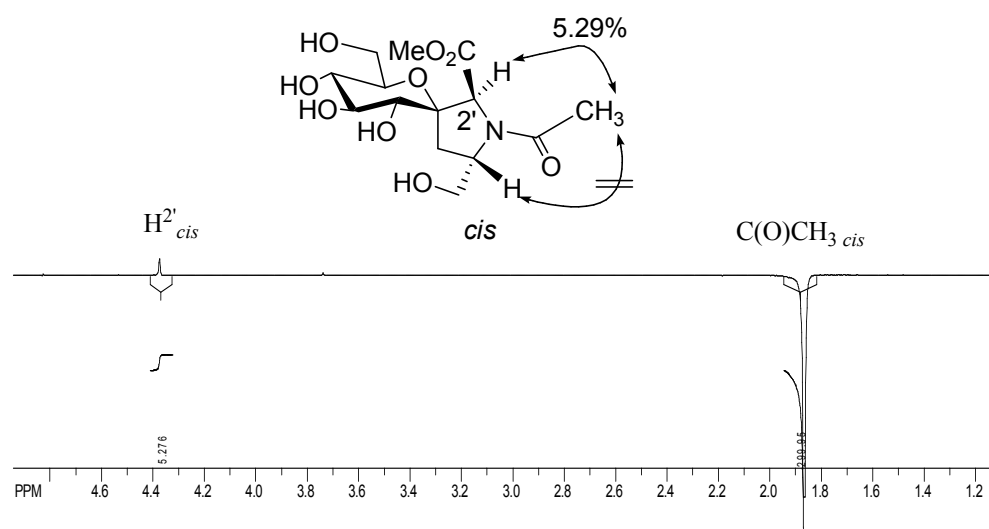

Different Chemical shift of C-2' ( $\alpha$ -carbon) for *cis* and *trans* rotamers of compound 3 in  $\text{CD}_3\text{OD}$  (HSQC)

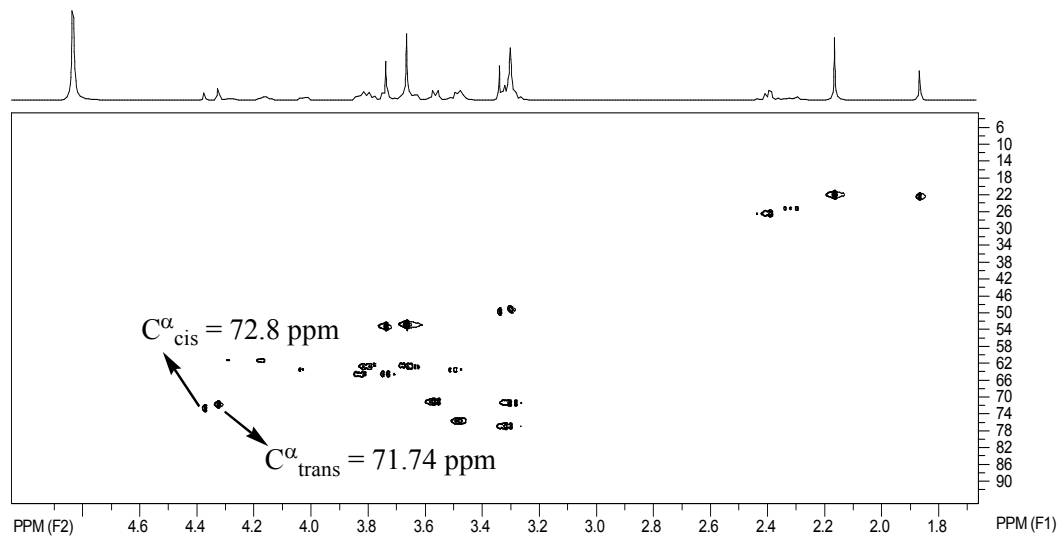

Compound **3** in D<sub>2</sub>O

1D nOe spectrum

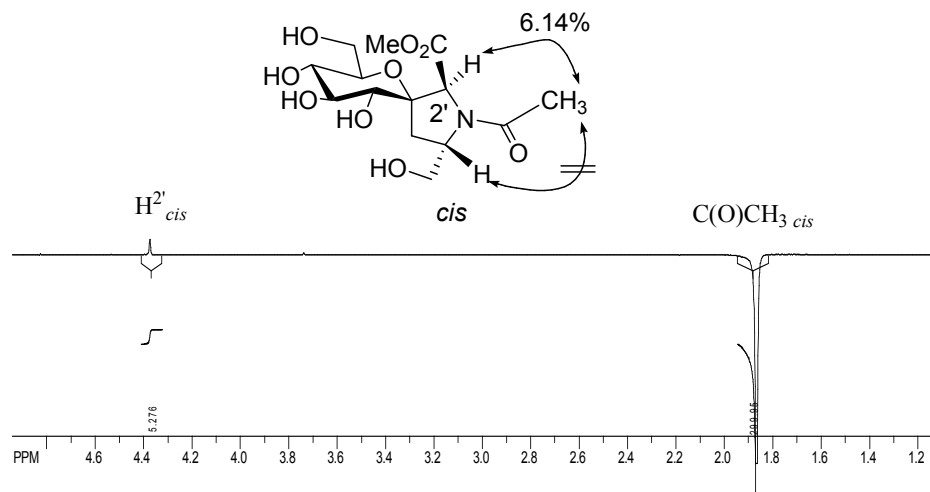

Different chemical shift of C-2' ( $\alpha$ -carbon) for *cis* and *trans* rotamers of compound **3** in D<sub>2</sub>O (HSQC)

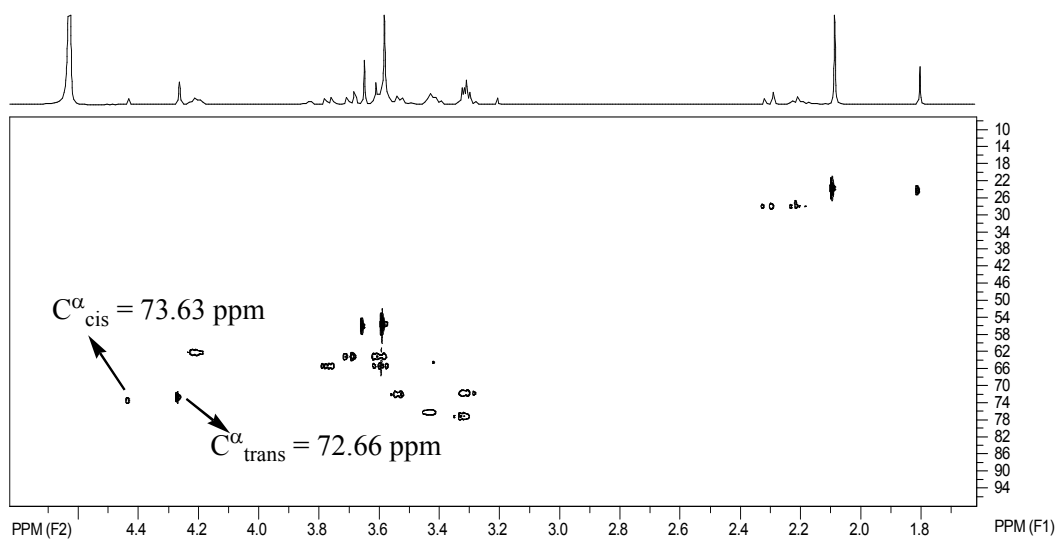

Compound **4** in CD<sub>3</sub>OD

<sup>1</sup>H NMR spectrum

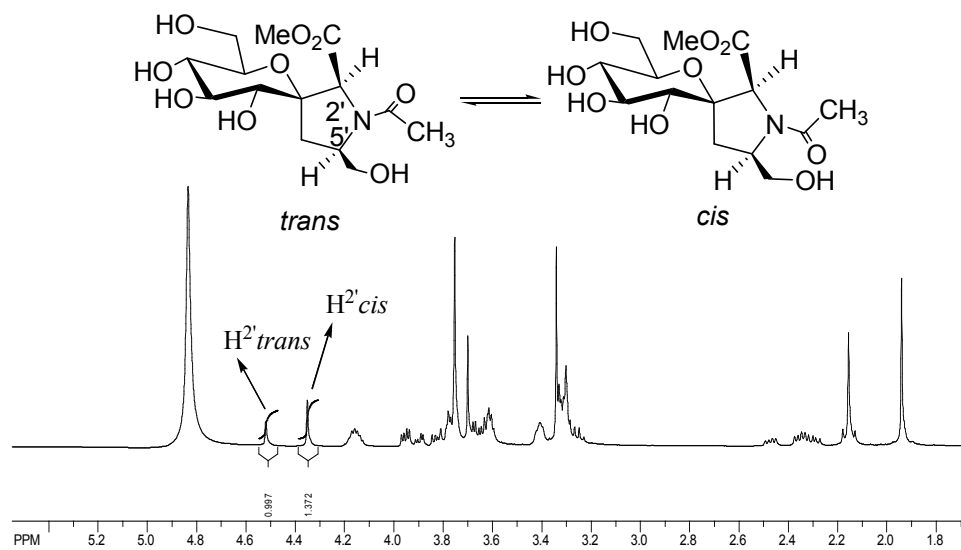

1D nOe spectrum

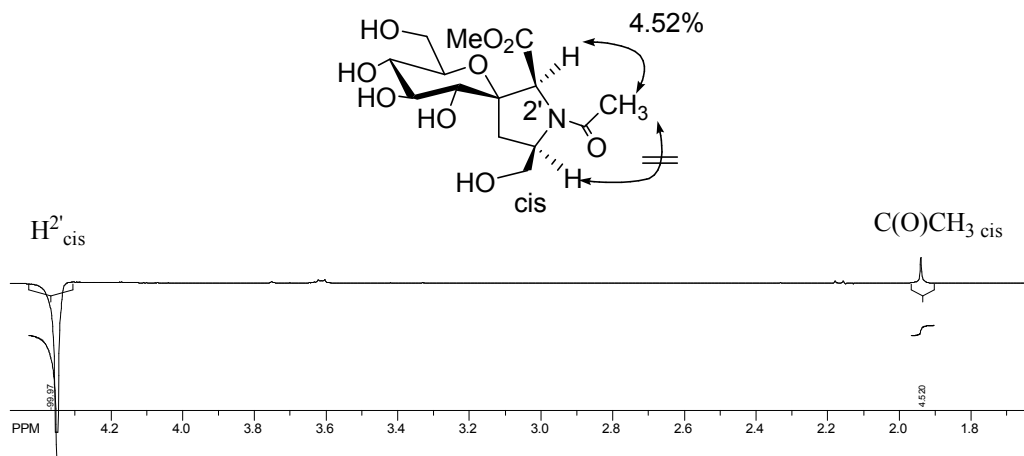

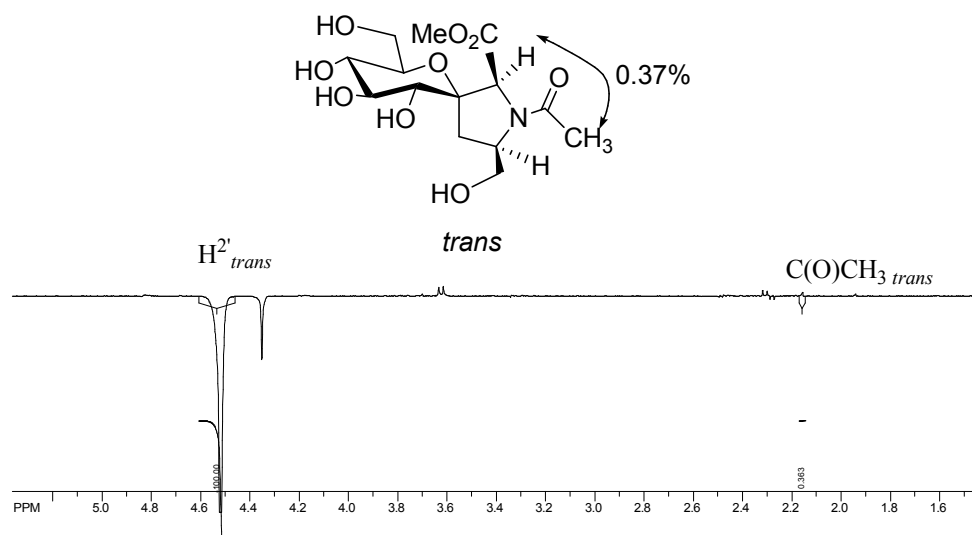

Different chemical shift of C-2' ( $\alpha$ -carbon) for *cis* and *trans* rotamers of compound 4 in  $\text{CD}_3\text{OD}$  (HSQC)

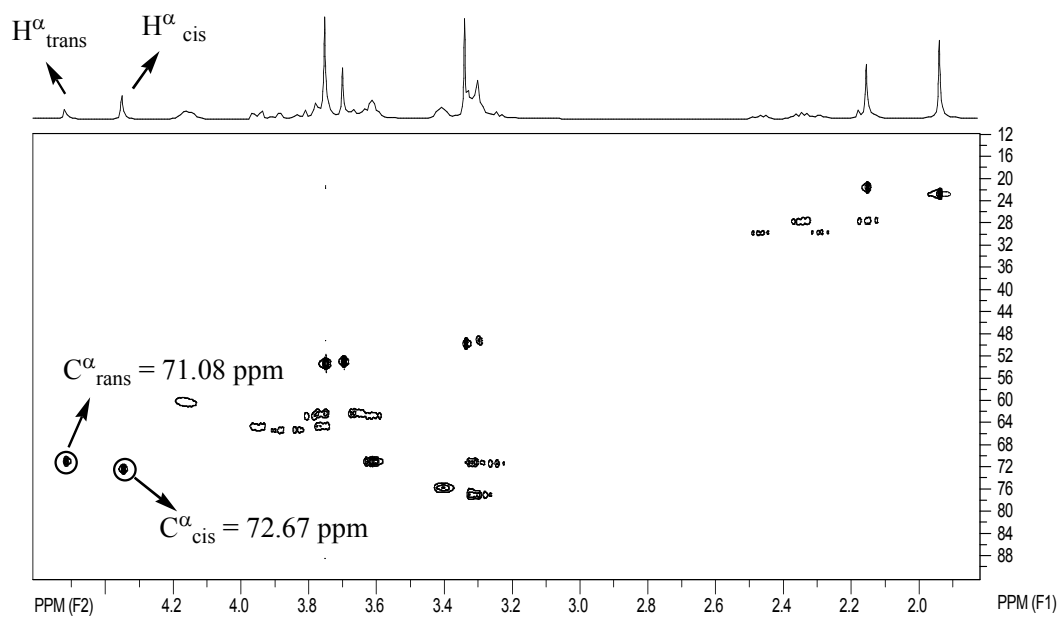

Compound **4** in D<sub>2</sub>O

1D nOe spectrum

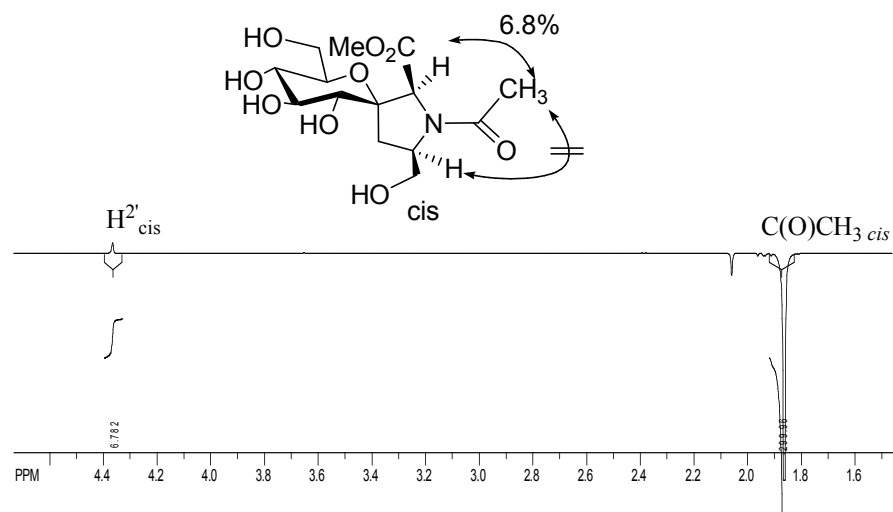

Different chemical shift of C-2' ( $\alpha$ -carbon) for *cis* and *trans* rotamers of compound **4** in D<sub>2</sub>O (HSQC)

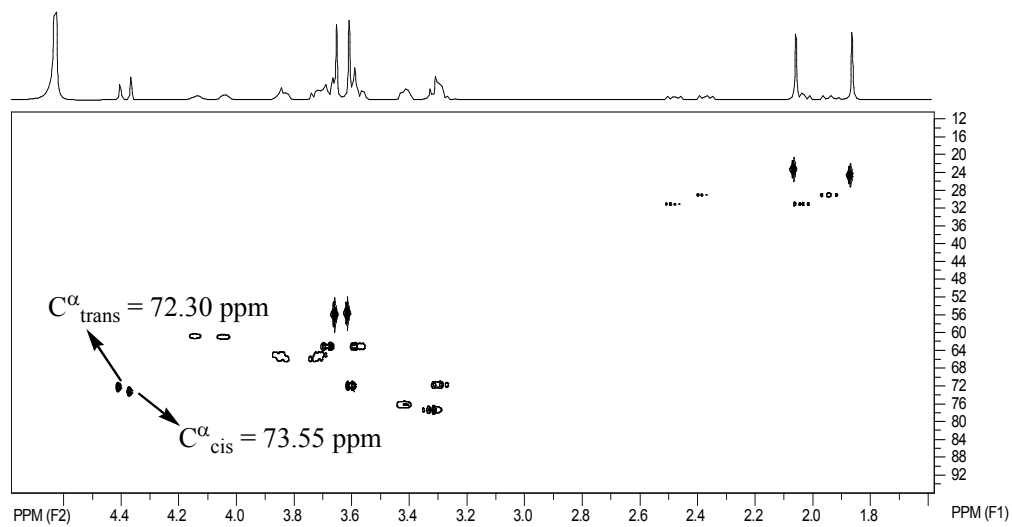

Different chemical shift of  $\alpha$ -carbon for *cis* and *trans* rotamers of compound **5** in  $D_2O$  (HSQC)

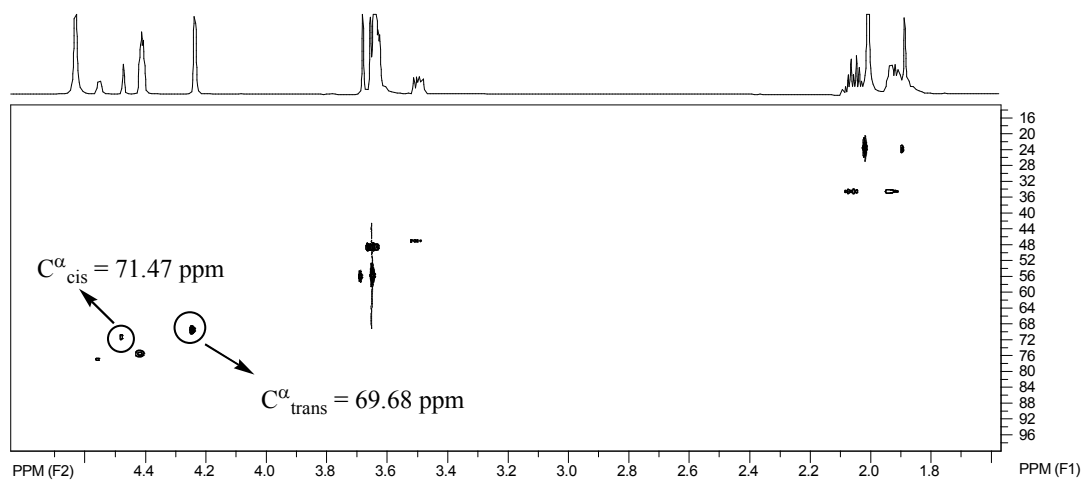

Different chemical shift of  $\alpha$ -carbon for *cis* and *trans* rotamers of compound **6** in  $D_2O$  (HSQC)

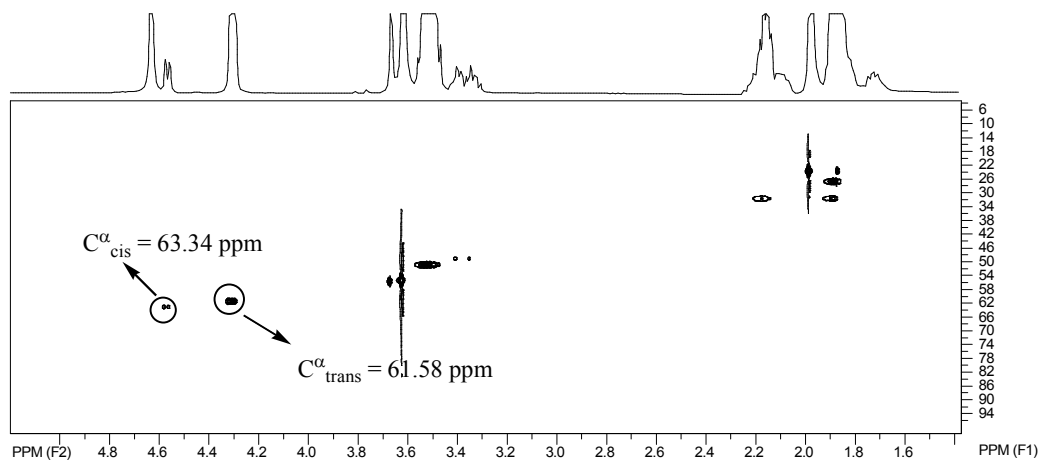

Compound 7 in D<sub>2</sub>O

1D nOe spectrum

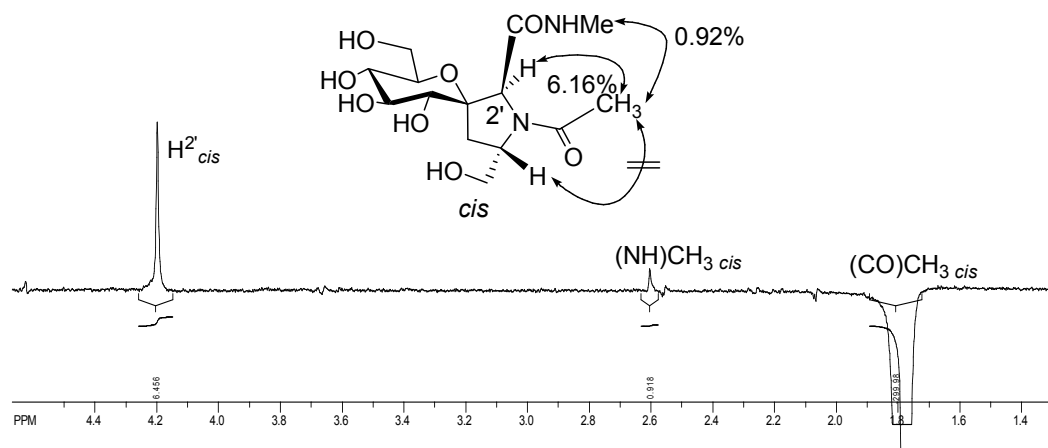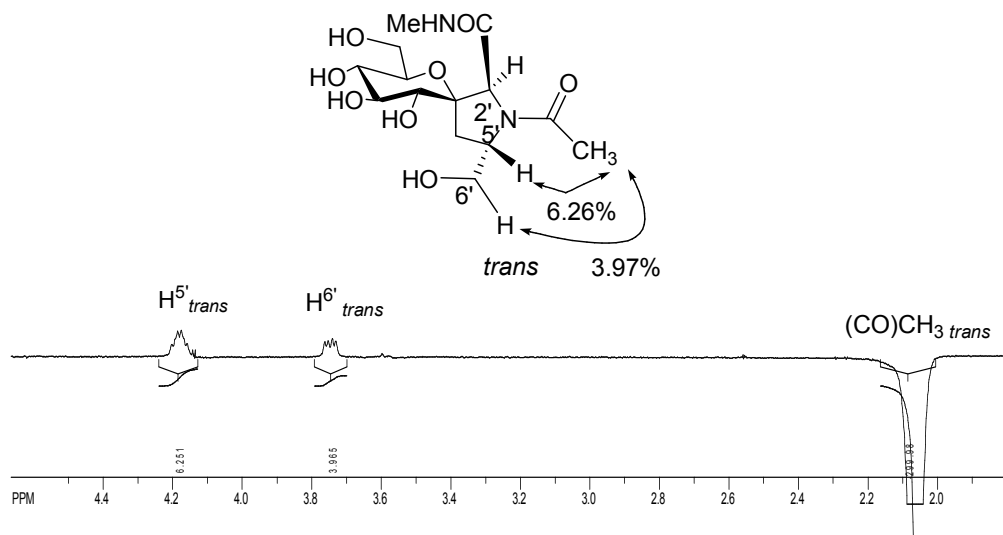



Compound **7** in CD<sub>3</sub>OD

1D nOe spectrum

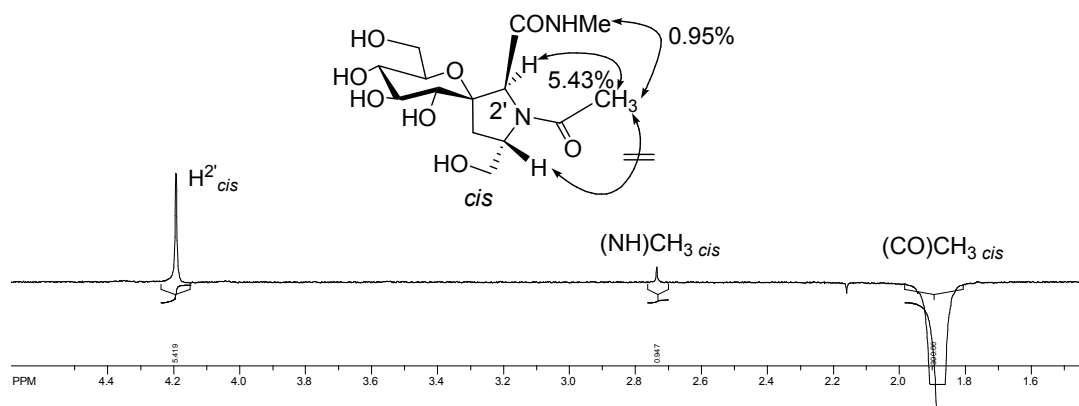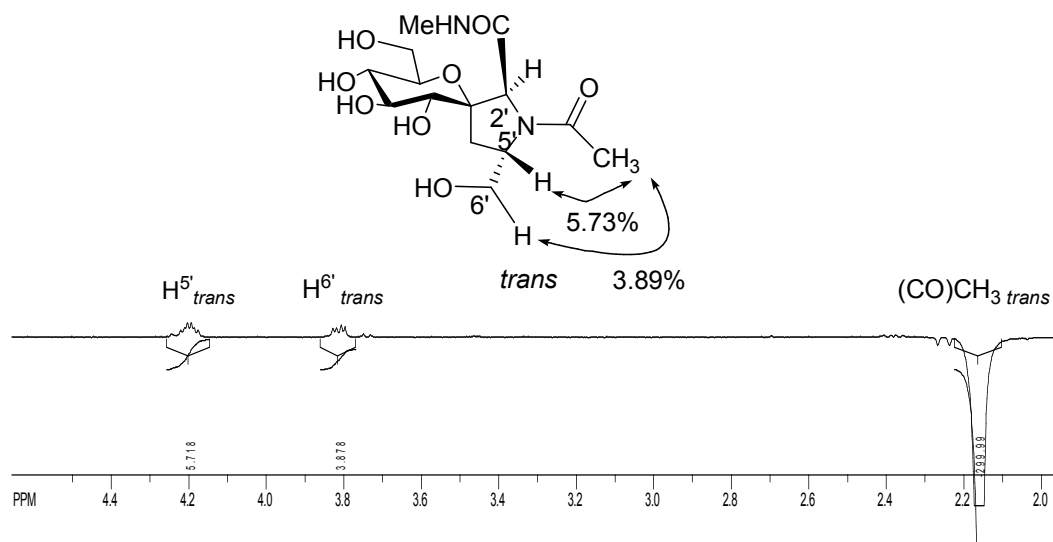

Compound **8** in D<sub>2</sub>O

1D nOe spectrum

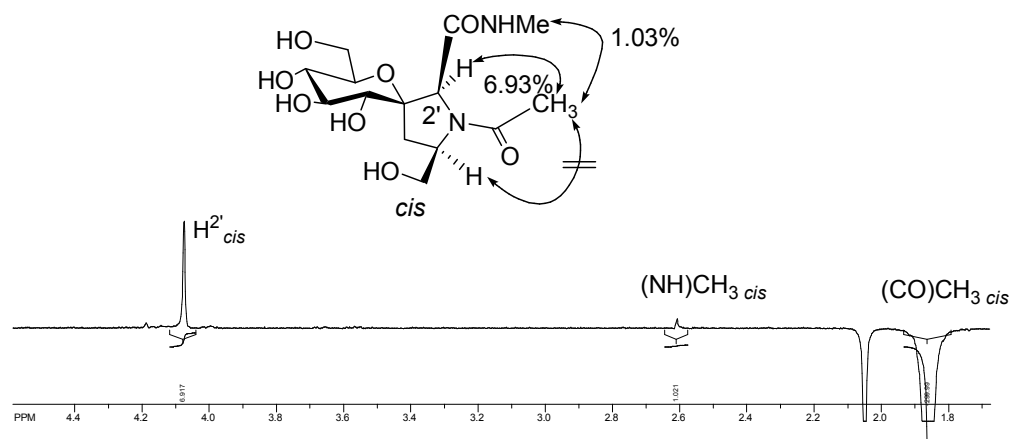

Compound **8** in CD<sub>3</sub>OD

1D nOe spectrum

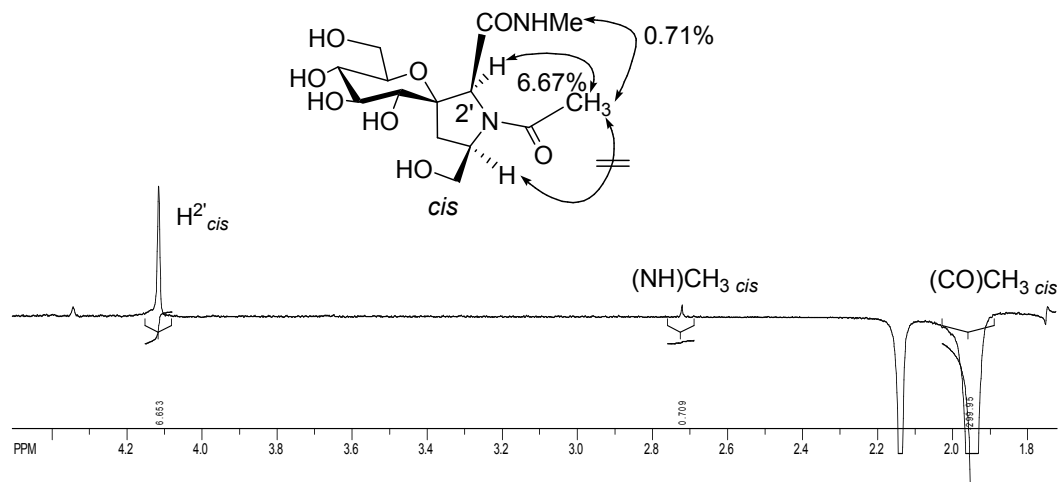

**Magnetization transfer NMR experiments** were performed on a 500MHz NMR spectrometer, equipped with selective excitation units and a triple resonance ( $^1\text{H}$ ,  $^{13}\text{C}$ ,  $^{15}\text{N}$ ) gradient inverse probehead. Experiments were performed over several temperatures between 318 and 364 K. Temperature settings of spectrometer were calibrated using an ethylene glycol standard. Selective inversion of proton *trans*- and *cis*-isomer signals were done with Gaussian pulses centered on resonance  $\pm 12.5$  Hz. Relaxation time was 15 s (**3**), 12 s (**4**), 35 s (**5**) and 40 s (**6**). The inversion-recovery delay of between 1 ms and relaxation time was used. Data for each inversion recovery point were averaged over 32 points. Samples of **3-6** were prepared at concentration of 0.01 M in  $\text{D}_2\text{O}$ . Here, selective inversion of the protons for each compound was different due to their different well-resolved  $^1\text{H}$  peaks. i.e. The methyl group of prolyl amide (*trans*) for compound **3**, the axial  $\text{H}^{\gamma}$  (*cis*) for compound **4**,  $\alpha$ -proton for compound **5** and **6** were selectively inverted.  $^1\text{H}$  NMR spectroscopy was used in preference to  $^{13}\text{C}$  NMR since over the course of an experiment, the signal/noise ratio is much higher for  $^1\text{H}$  than  $^{13}\text{C}$ , and heating effects caused by decoupling for  $^{13}\text{C}$  causes uncertainty in the temperature of the sample.

The time-dependent magnetization transfers of the *cis* ( $M_c(t)$ ) and *trans* ( $M_t(t)$ ) NMR signals as a function of the inversion transfer time ( $t$ ) were simultaneously fit to equations 1 and 2 (Alger and Prestegard, 1977; Mariappan and Rabenstein, 1992) below for compounds **3-6** using *Mathematica* (v. 5.0). In the following pulse sequence, the  $^1\text{H}$  one isomer resonance such as *trans* is selectively inverted using a shaped pulse. Its recovery during  $t$  is determined by its intrinsic  $T_{1t}$ , magnetization transfer to and from the *cis* resonance, and the  $T_{1c}$  of the *cis* resonance:

$\pi(x)\text{sel}-----t-----\pi/2(x,y.-x.-y)---\text{acquire}$

The resonances of the *trans* and *cis* isomers show the following time dependences:

$$M_t(t) = (c_1)(\tau_t)(\lambda_1 + 1/\tau_{1c})\exp(\lambda_1 * t) + (c_2)(\tau_c)(\lambda_2 + 1/\tau_{1c})\exp(\lambda_2 * t) + M_{c\infty}----- 1$$

$$M_t(t) = (c_1)\exp(\lambda_1 * t) + (c_2)\exp(\lambda_2 * t) + M_{t\infty}----- 2$$

$T_{1c}$  and  $T_{1t}$  are the longitudinal relaxation times of the resonances in the absence of exchange.

$\tau_c$  and  $\tau_t$  are the lifetimes of the *cis* and *trans* conformers and  $k_{ct}$  and  $k_{tc}$  are the corresponding rate constants.

$\tau_{1c}$  and  $\tau_{1t}$  are the effective relaxation times of the *cis* and *trans* resonances when relaxation and exchange are both occurring and are defined below in terms of  $T_{1c}$  and  $\tau_c$ ,  $T_{1t}$  and  $\tau_t$ .

$\lambda_1$  and  $\lambda_2$  are related to the time constants  $\tau_c$ ,  $\tau_t$ ,  $\tau_{1c}$ , and  $\tau_{1t}$ , and are defined below.

$c_1$  and  $c_2$  are defined below.

$M_{c\infty}$  and  $M_{t\infty}$  are determined experimentally from the magnetization measured after 5  $T_1$  periods for the *cis* and *trans* resonances, respectively.

*Mathematica* then calculates  $\tau_t$  from  $\tau_c$ ,  $M_{c\infty}$ , and  $M_{t\infty}$  as:  $\tau_t = \tau_c * M_{t\infty}/M_{c\infty}$

Thus,  $k_{ct} = 1/\tau_c$ ,  $k_{tc} = 1/\tau_t$ ,  $K_{eq} = M_{t\infty}/M_{c\infty}$ ,  $\tau_{1c} = (T_{1c} * \tau_c)/(\tau_c + T_{1c})$ ,  $\tau_{1t} = (T_{1t} * \tau_t)/(\tau_t + T_{1t})$

$\lambda_1 = (0.5)*(-(1/\tau_{1c})+(1/\tau_{1t}))+((((1/\tau_{1c})+(1/\tau_{1t}))1/2)-(4)*(((1/\tau_{1c})*(1/\tau_{1t}))-(1/\tau_c)*(1/\tau_t))))1/2)$

$\lambda_2 = (0.5)*(-(1/\tau_{1c})+(1/\tau_{1t}))-( (((1/\tau_{1c})+(1/\tau_{1t}))2)-(4)*(((1/\tau_{1c}))*((1/\tau_{1t}))-((1/\tau_c)*(1/\tau_t))))1/2)$

$c_2 = ((1/(\tau_t))*(\lambda_1-\lambda_2))*((\tau_t*(\lambda_1+(1/\tau_{1c}))*((M_{0c}-M_{c\infty})+(M_{t\infty}-M_{0t})))$

$c_1 = M_{0c}-M_{c\infty}-c_2$

All experimental data for each compound at different temperature were fit by using *Mathematica* 5.0 to give the following inversed and inversion-recovery fitting curves:

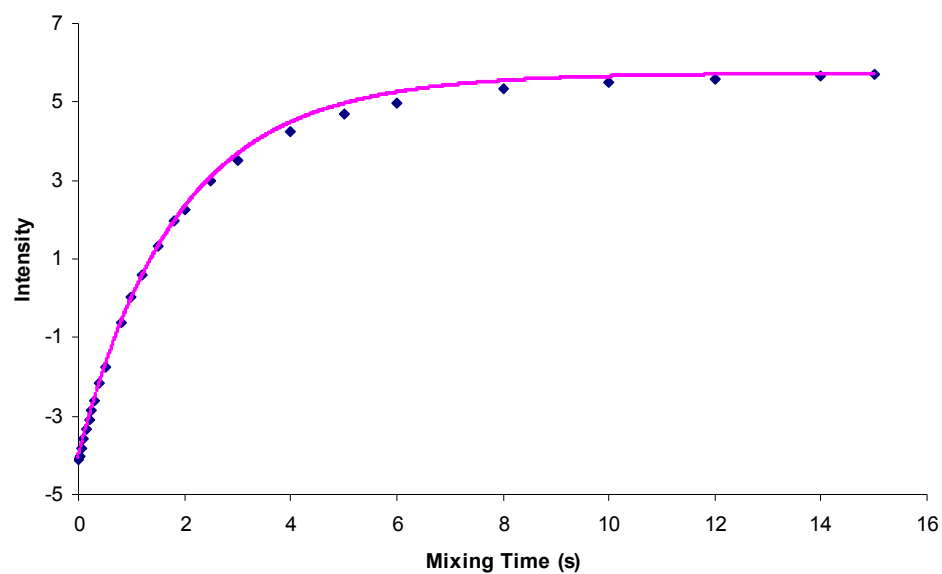

**Figure 1.** Inverted *N*-amide methyl group (*trans*) for compound **3** at 83°C in D<sub>2</sub>O

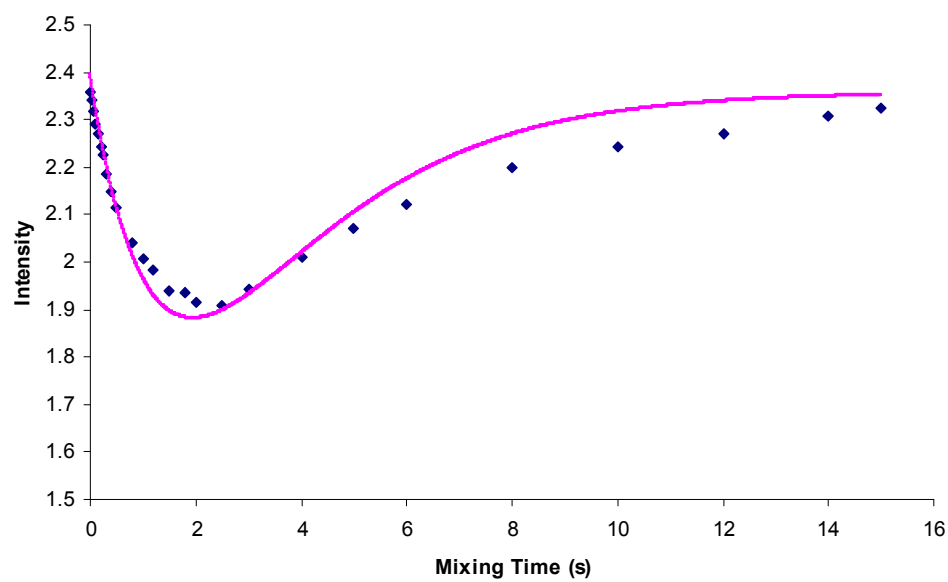

**Figure 2.** Inversion-recovery of *N*-amide methyl group (*cis*) for compound **3** at 83°C in D<sub>2</sub>O

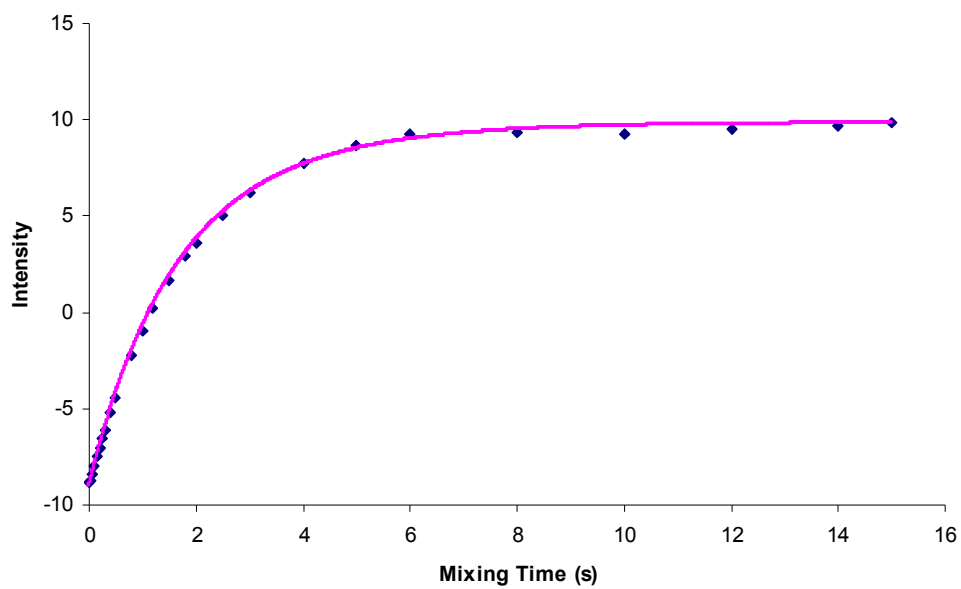

**Figure 3.** Inversed *N*-amide methyl group (*trans*) for compound **3** at 86°C in D<sub>2</sub>O

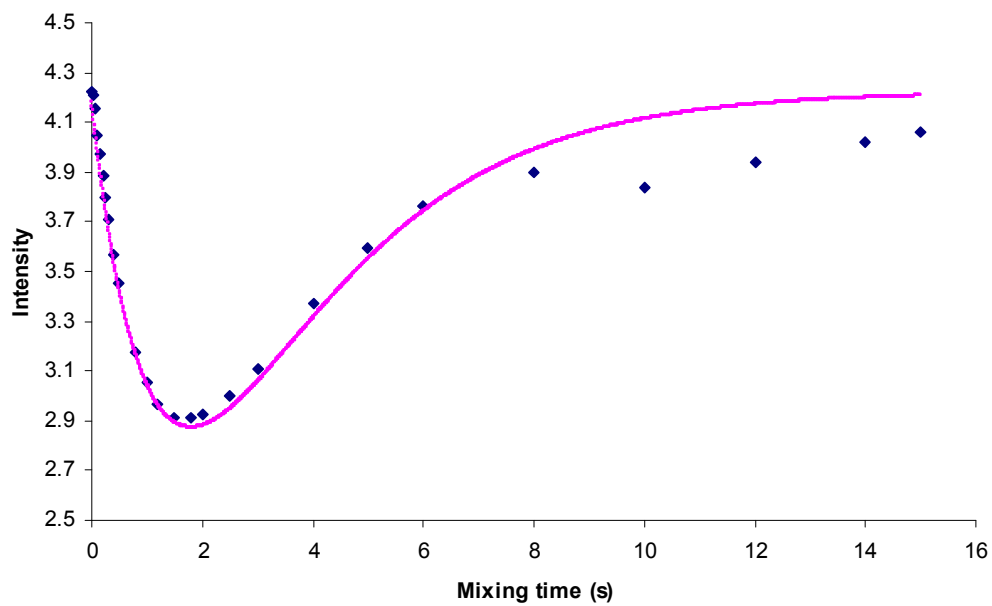

**Figure 4.** Inversion-recovery of *N*-amide methyl group (*cis*) for compound **3** at 86°C in D<sub>2</sub>O

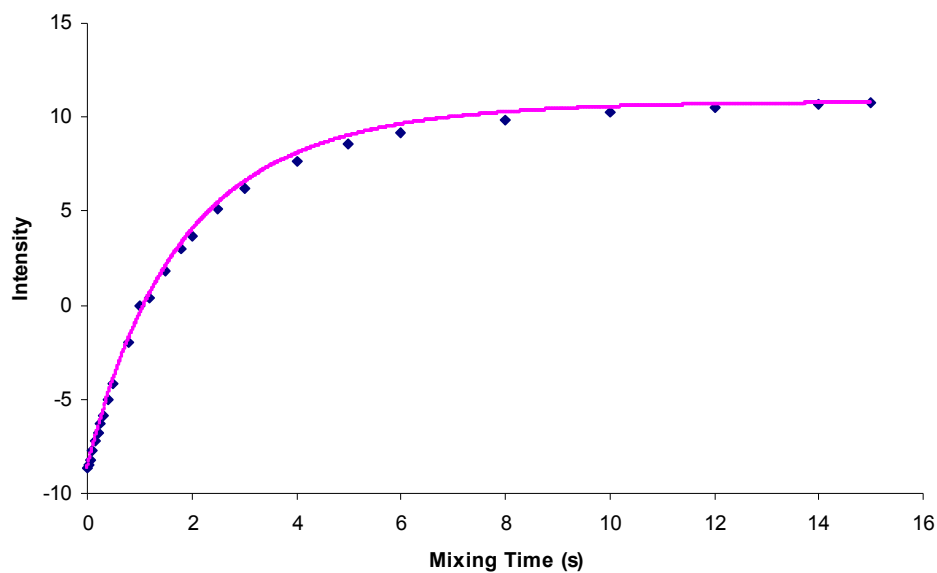

**Figure 5.** Inversed *N*-amide methyl group (*trans*) for compound **3** at 89°C in D<sub>2</sub>O

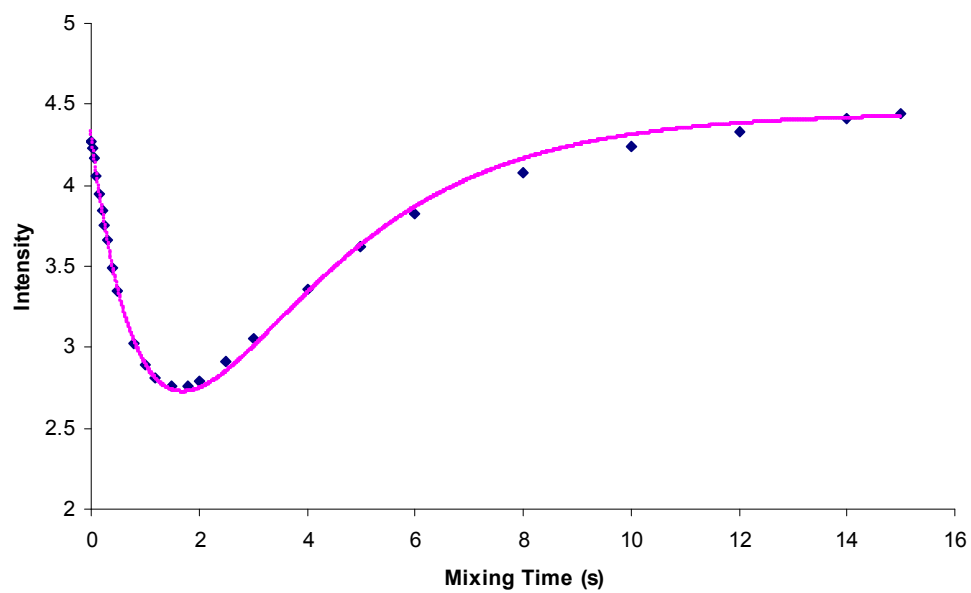

**Figure 6.** Inversion-recovery of *N*-amide methyl group (*cis*) for compound **3** at 89°C in D<sub>2</sub>O

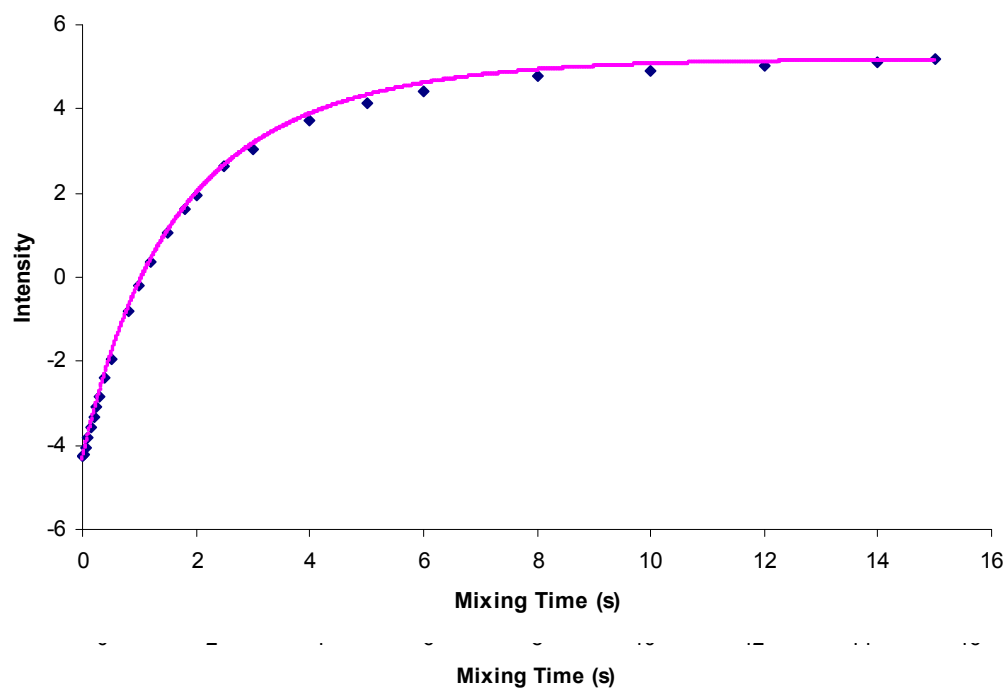

**Figure 7.** Inversed *N*-amide methyl group (*trans*) for compound **3** at 91°C in D<sub>2</sub>O

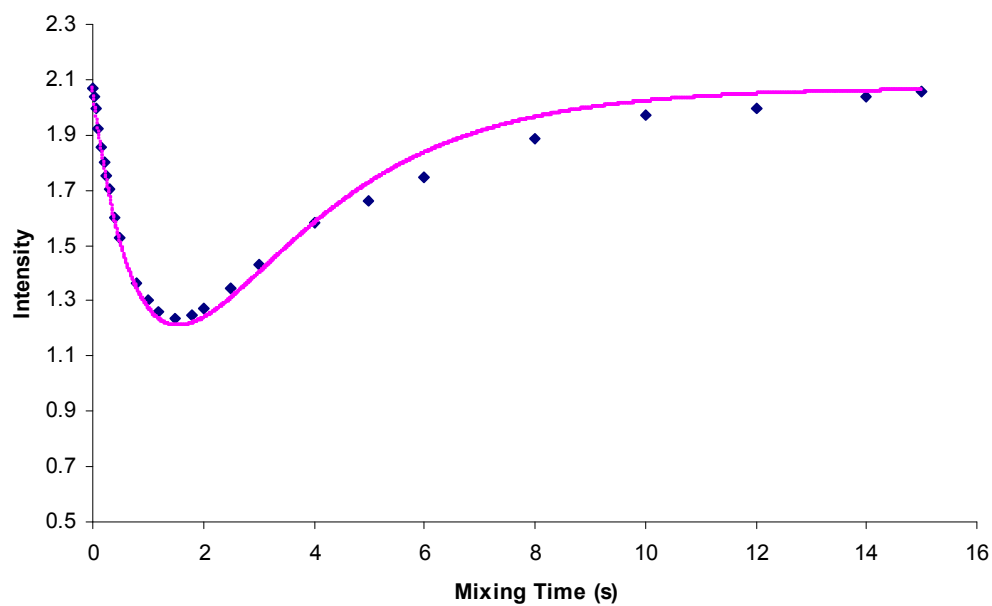

**Figure 8.** Inversion-recovery of *N*-amide methyl group (*cis*) for compound **3** at 91°C in D<sub>2</sub>O



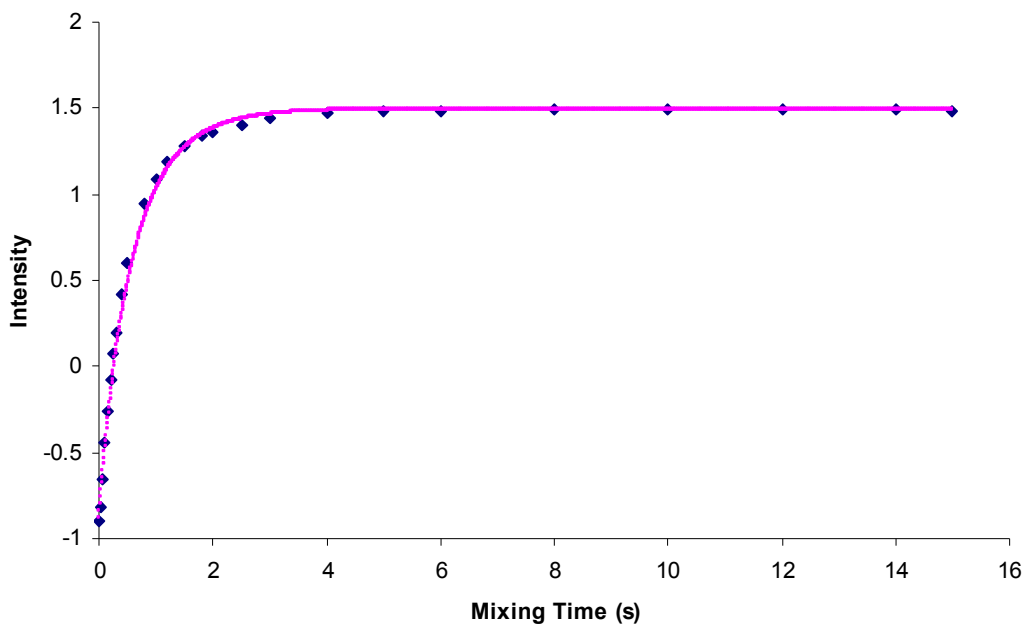

**Figure 9.** Inversed *N*-amide methyl group (*trans*) for compound **3** at 93°C in D<sub>2</sub>O

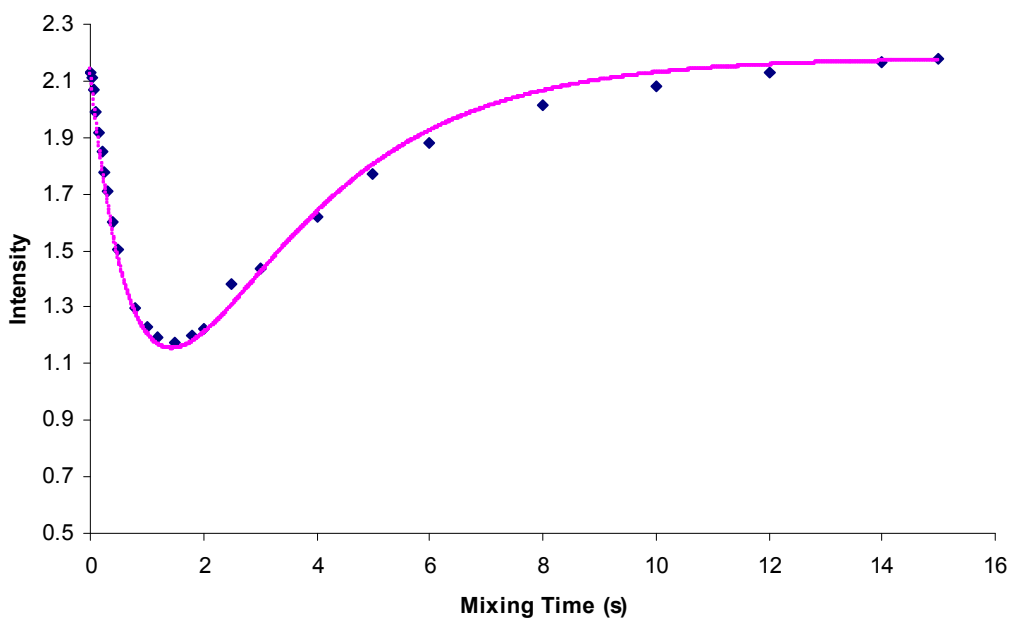

**Figure 10.** Inversion-recovery of *N*-amide methyl group (*cis*) for compound **3** at 93°C in D<sub>2</sub>O

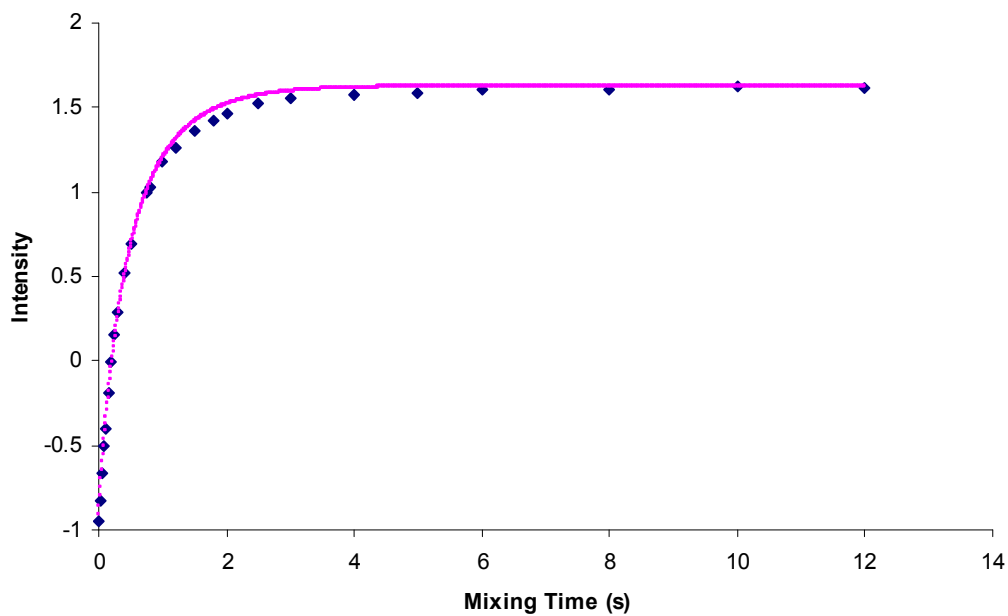

**Figure 11.** Inverted  $\delta$ -position axial proton (*cis*) for compound **4** at 46°C in D<sub>2</sub>O

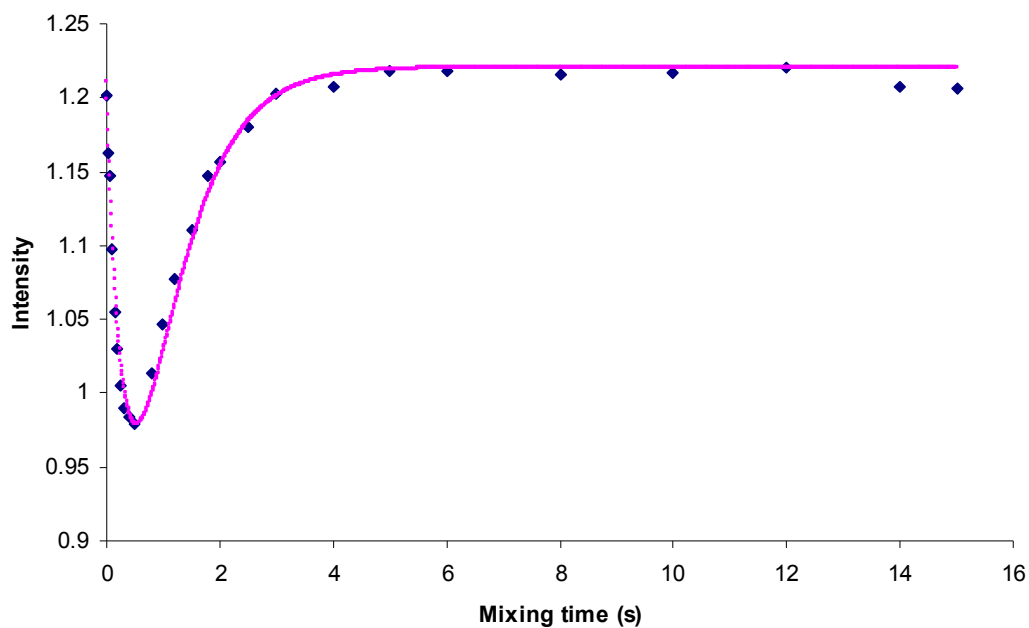

**Figure 12.** Inversion-recovery of non-inverted  $\delta$ -position axial proton (*trans*) for compound **4** at 46°C in D<sub>2</sub>O

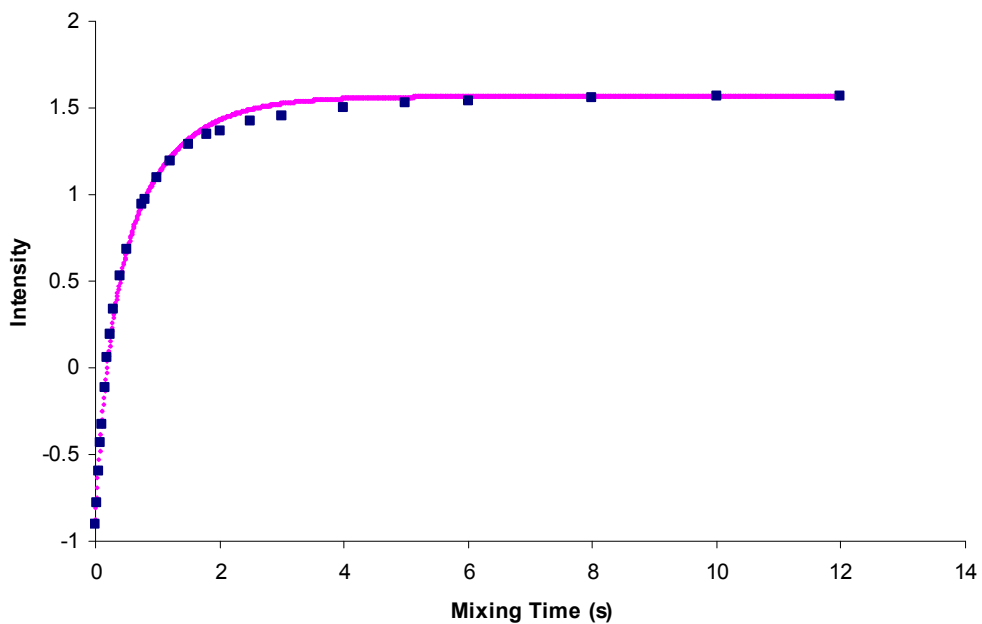

**Figure 13.** Inverted  $\delta$ -position axial proton (*cis*) for compound **4** at 52°C in  $D_2O$

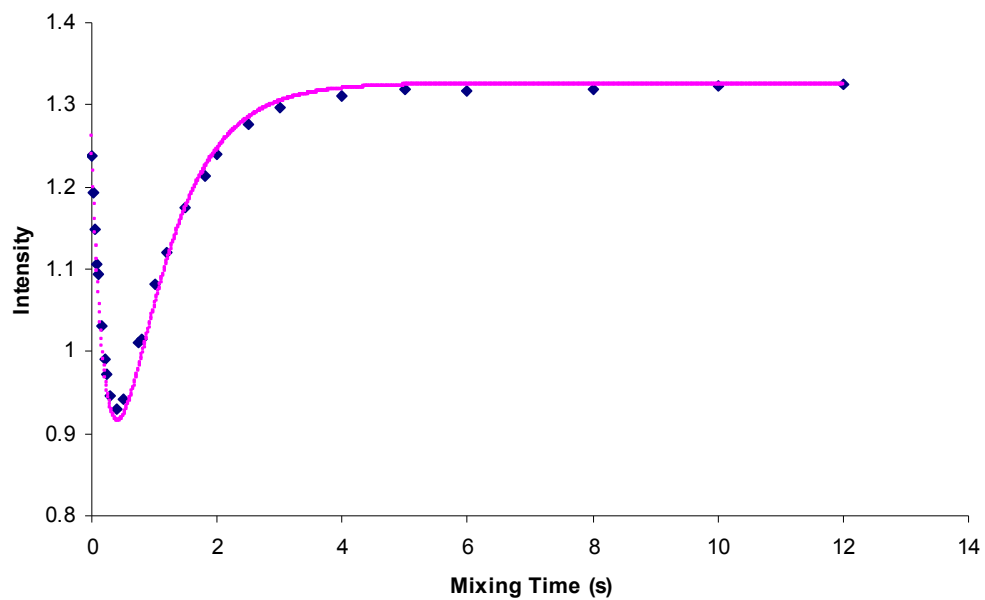

**Figure 14.** Inversion-recovery of non-inverted  $\delta$ -position axial proton (*trans*) for compound **4** at 52°C in  $D_2O$

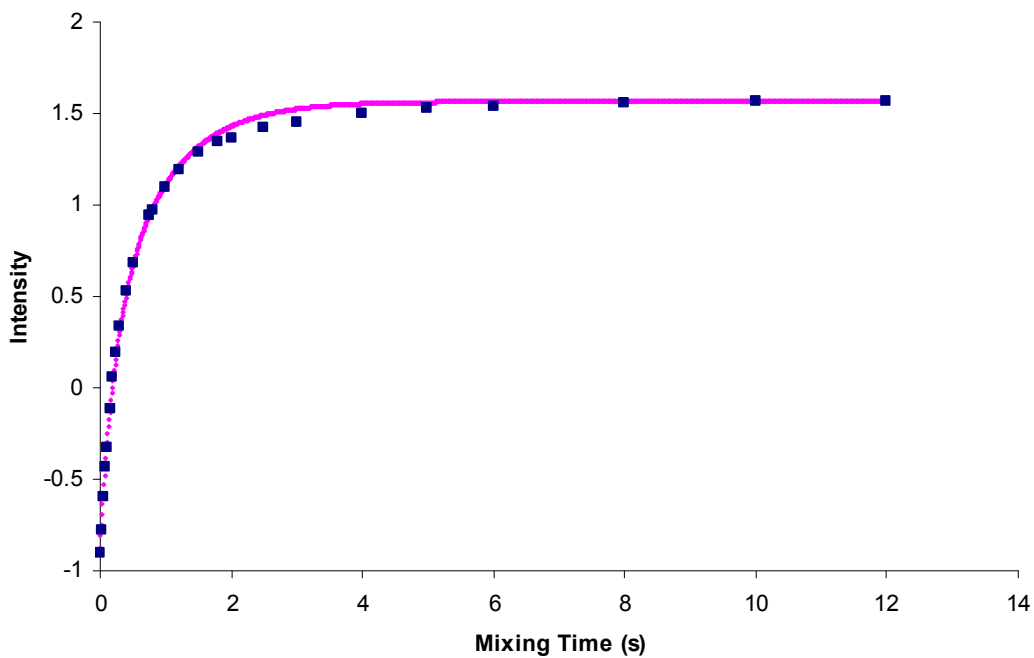

**Figure 15.** Inverted  $\delta$ -position axial proton (*cis*) for compound 4 at 57°C in D<sub>2</sub>O

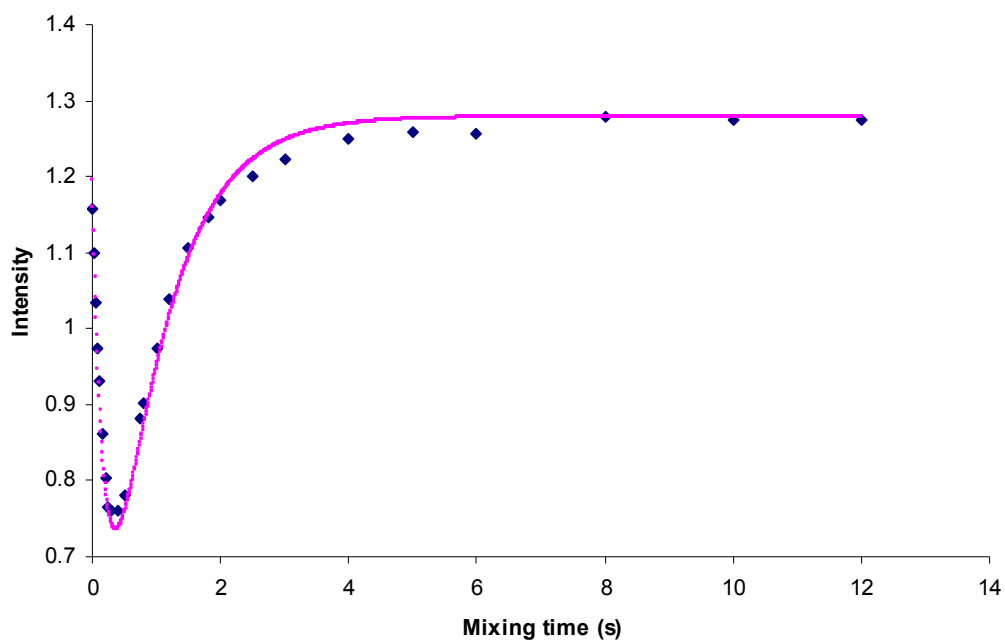

**Figure 16.** Inversion-recovery of non-inverted  $\delta$ -position axial proton (*trans*) for compound 4 at 57°C in D<sub>2</sub>O

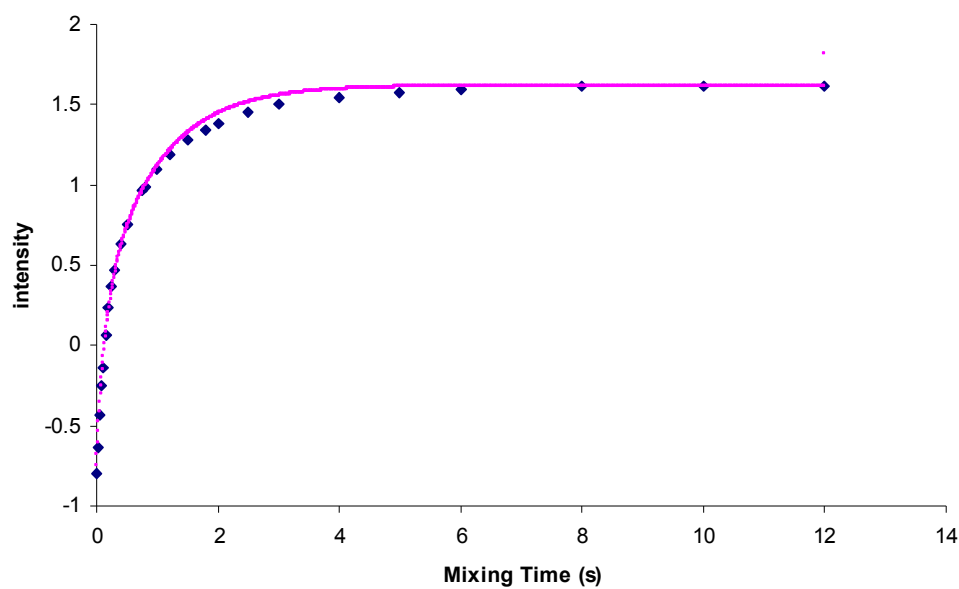

**Figure 17.** Inverted  $\delta$ -position axial proton (*cis*) for compound 4 at 62°C in D<sub>2</sub>O

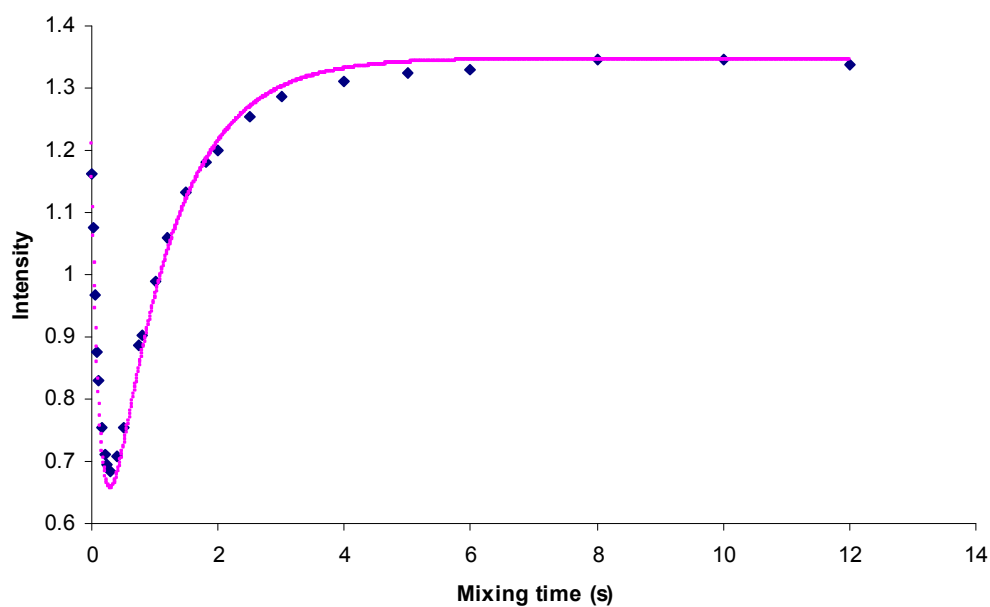

**Figure 18.** Inversion-recovery of non-inverted  $\delta$ -position axial proton (*trans*) for compound 4 at 62°C in D<sub>2</sub>O

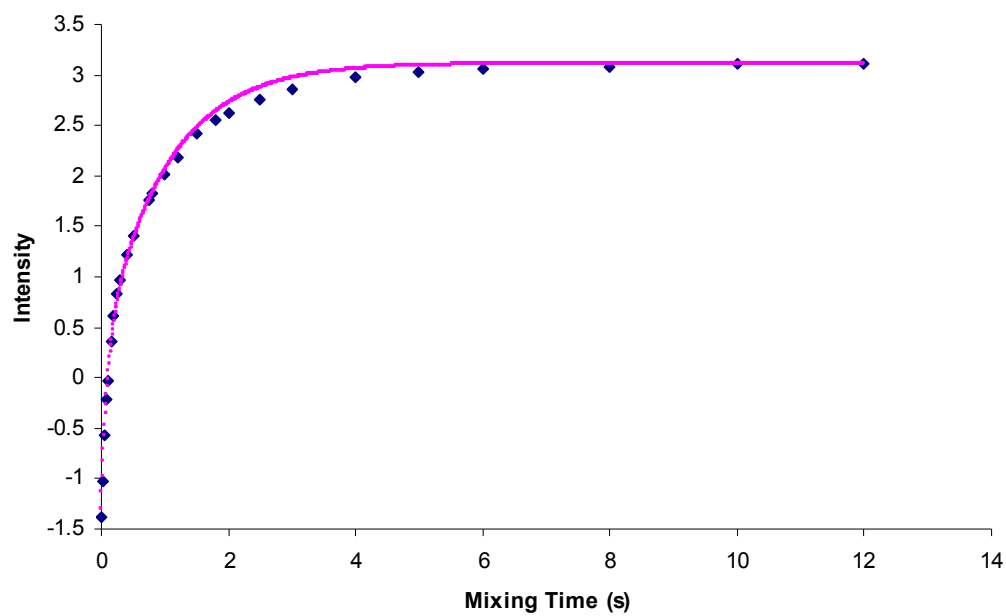

**Figure 19.** Inversed  $\delta$ -position axial proton (*cis*) for compound **4** at 67°C in D<sub>2</sub>O

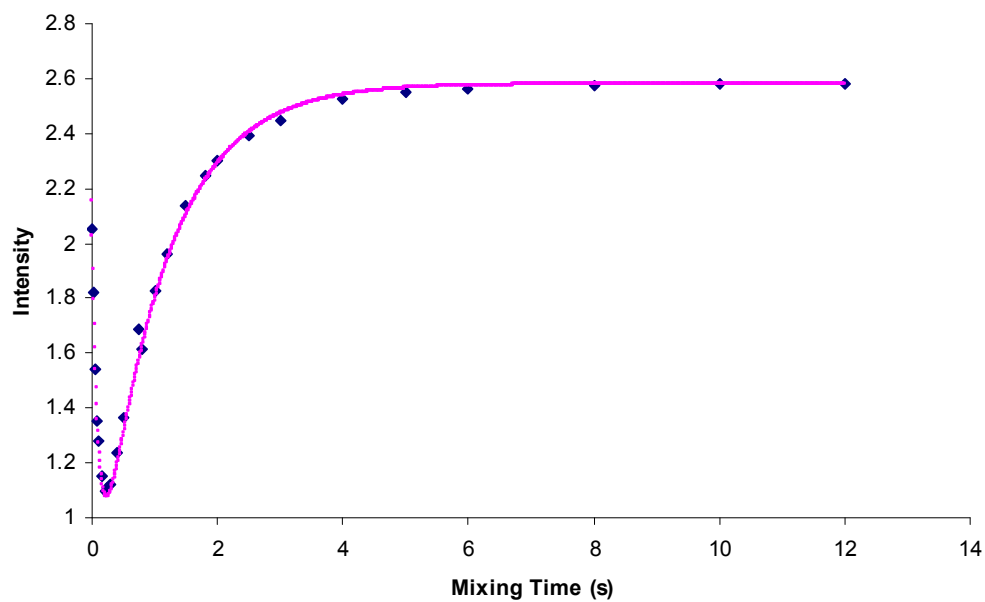

**Figure 20.** Inversion-recovery of non-inversed  $\delta$ -position axial proton (*trans*) for compound **4** at 67°C in D<sub>2</sub>O

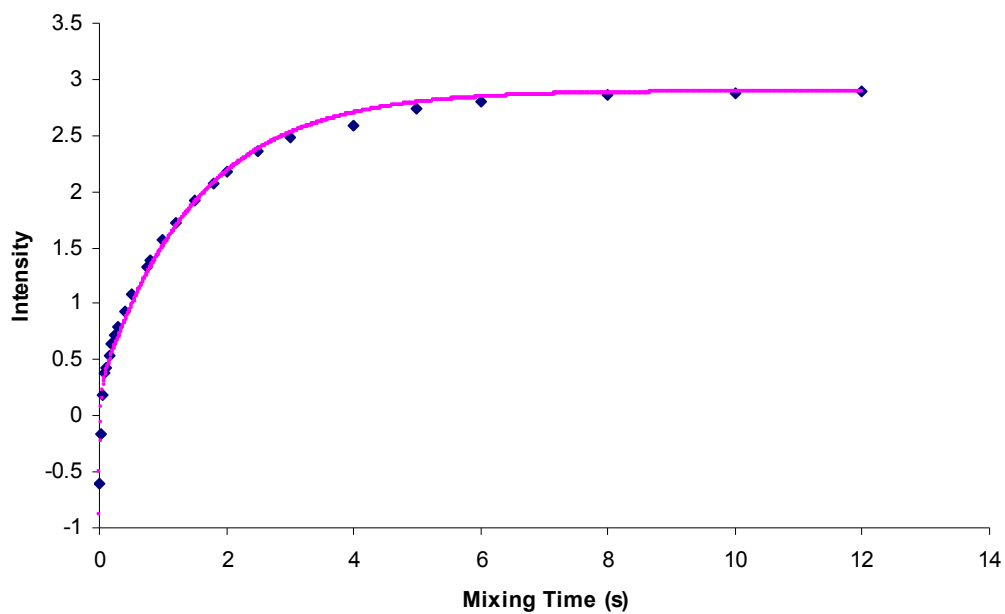

**Figure 21.** Inversed  $\delta$ -position axial proton (*cis*) for compound **4** at 83°C in D<sub>2</sub>O

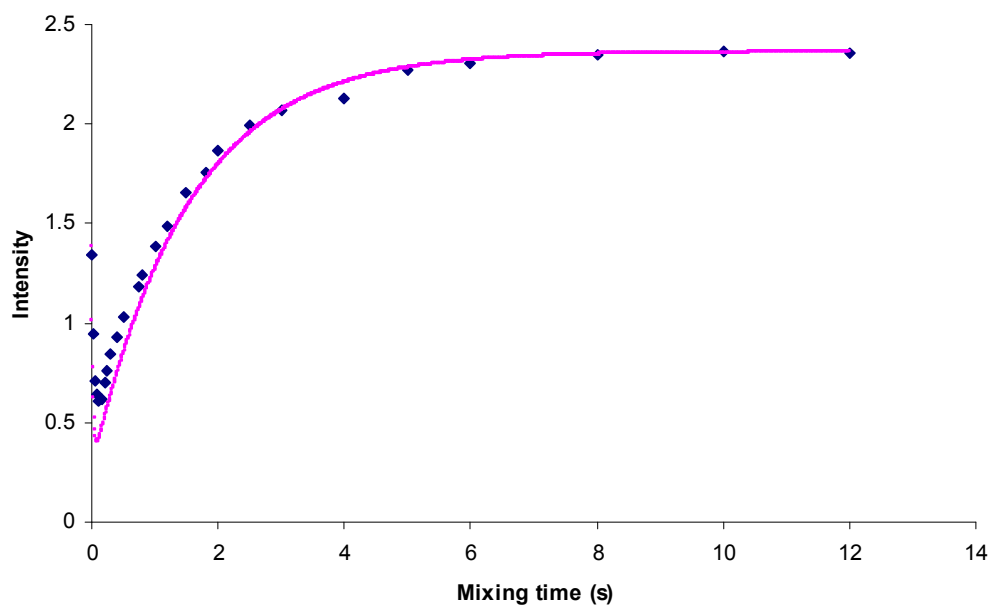

**Figure 22.** Inversion-recovery of non-inversed  $\delta$ -position axial proton (*trans*) for compound **4** at 83°C in D<sub>2</sub>O

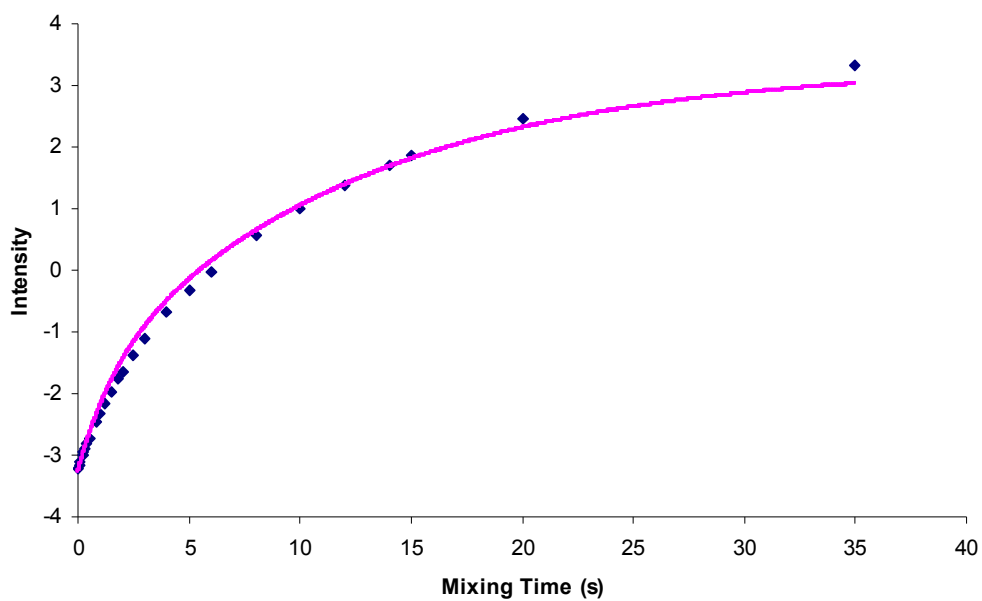

**Figure 23.** Inverted  $\alpha$ -proton (*trans*) for compound 5 at 62°C in D<sub>2</sub>O

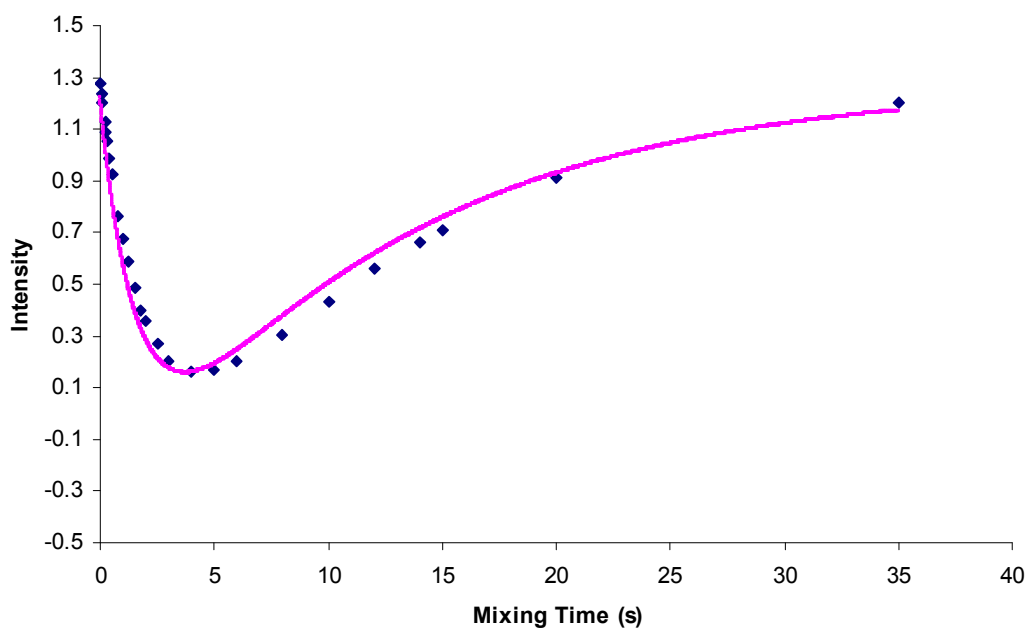

**Figure 24.** Inversion-recovery of  $\alpha$ -proton (*cis*) for compound 5 at 62°C in D<sub>2</sub>O



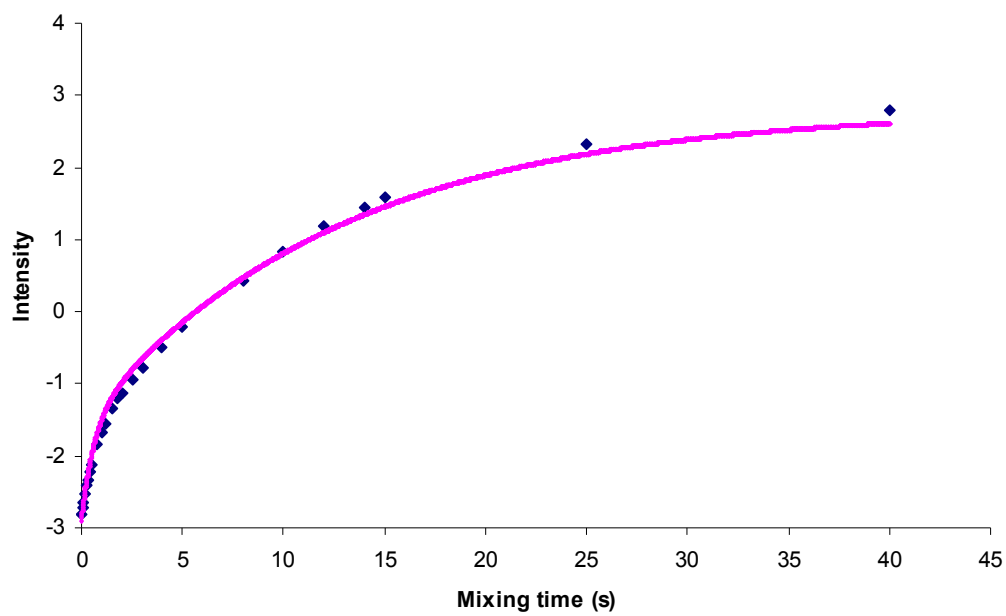

**Figure 25.** Inverted  $\alpha$ -proton (*trans*) for compound **5** at 73°C in D<sub>2</sub>O

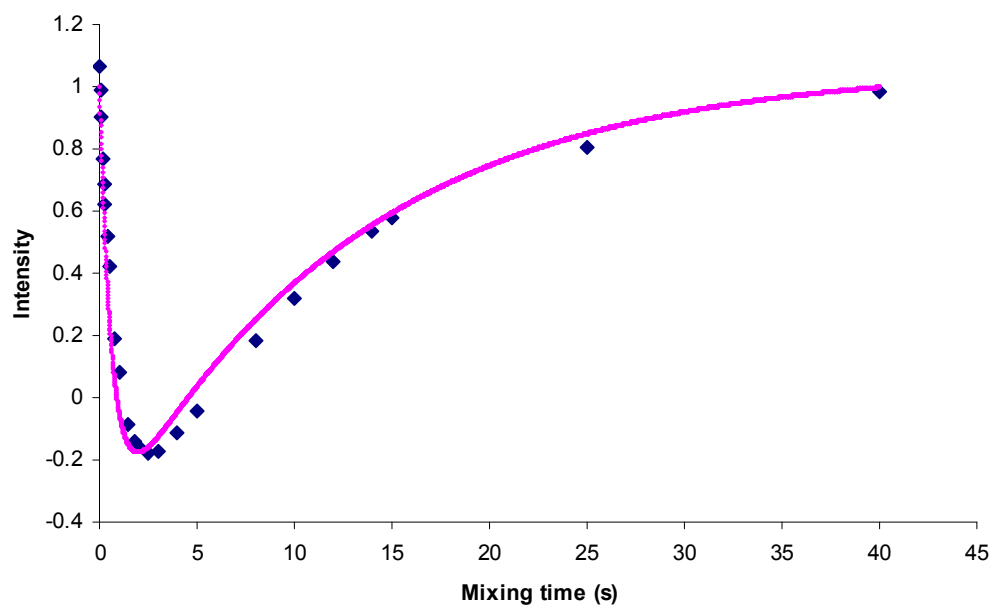

**Figure 26.** Inverted-recovery  $\alpha$ -proton (*cis*) for compound **5** at 73°C in D<sub>2</sub>O

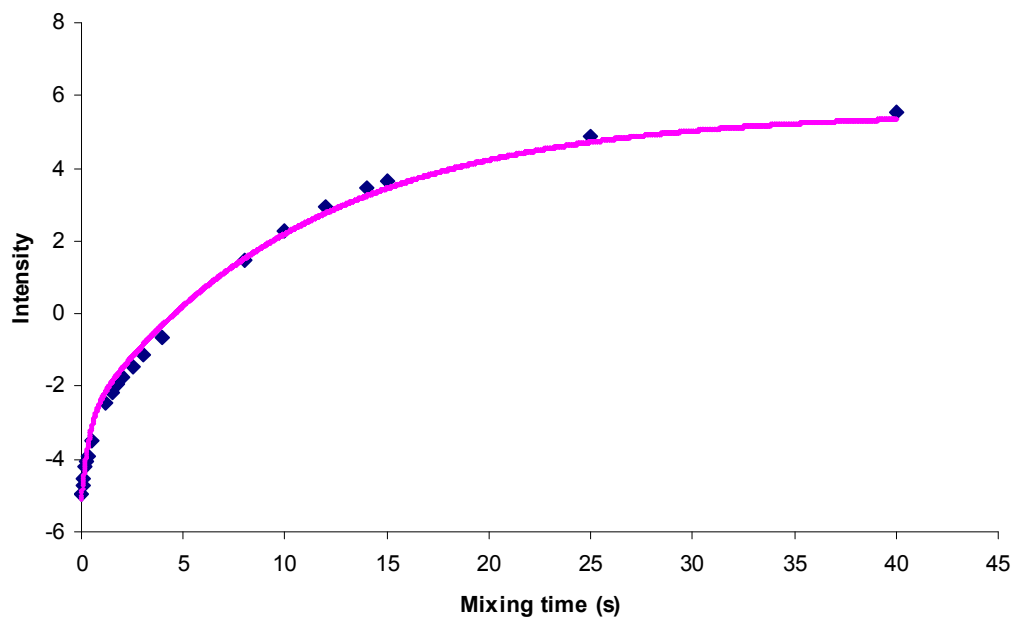

**Figure 27.** Inversed  $\alpha$ -proton (*trans*) for compound 5 at 78°C in D<sub>2</sub>O

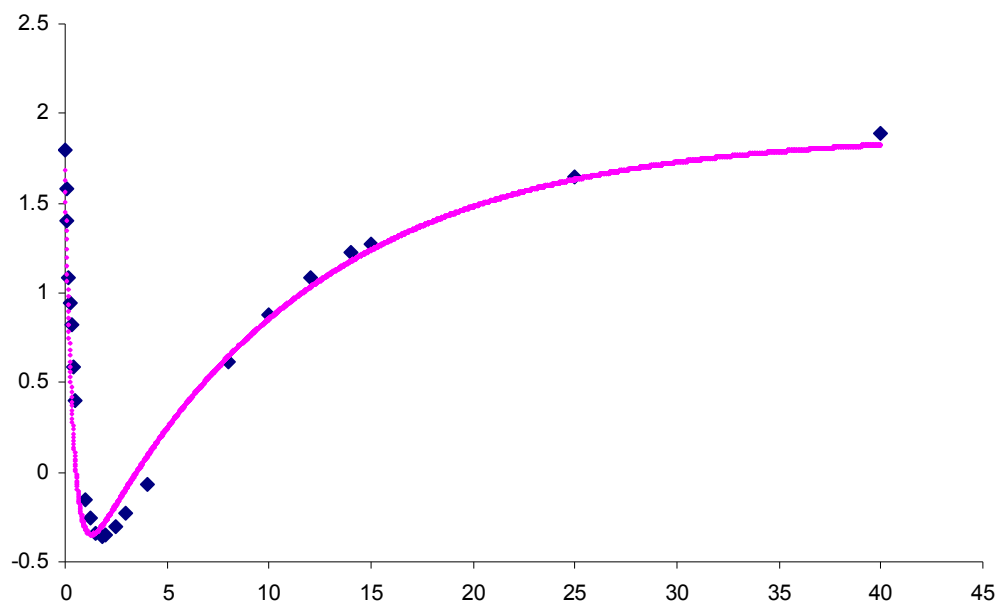

**Figure 28.** Inversed-recovery  $\alpha$ -proton (*cis*) for compound 5 at 78°C in D<sub>2</sub>O

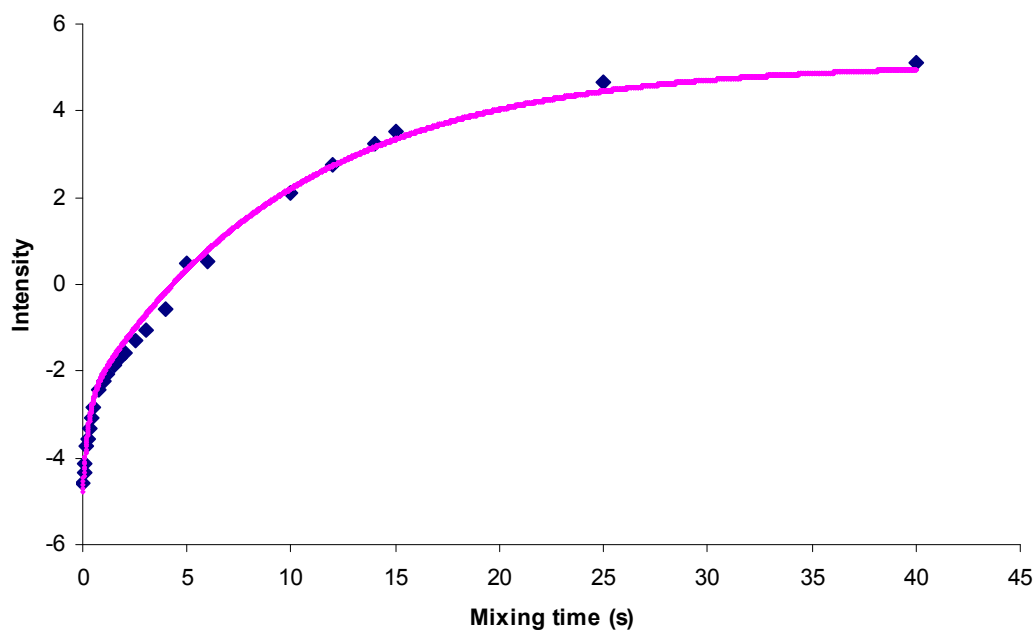

**Figure 29.** Inversed  $\alpha$ -proton (*trans*) for compound **5** at 83°C in D<sub>2</sub>O

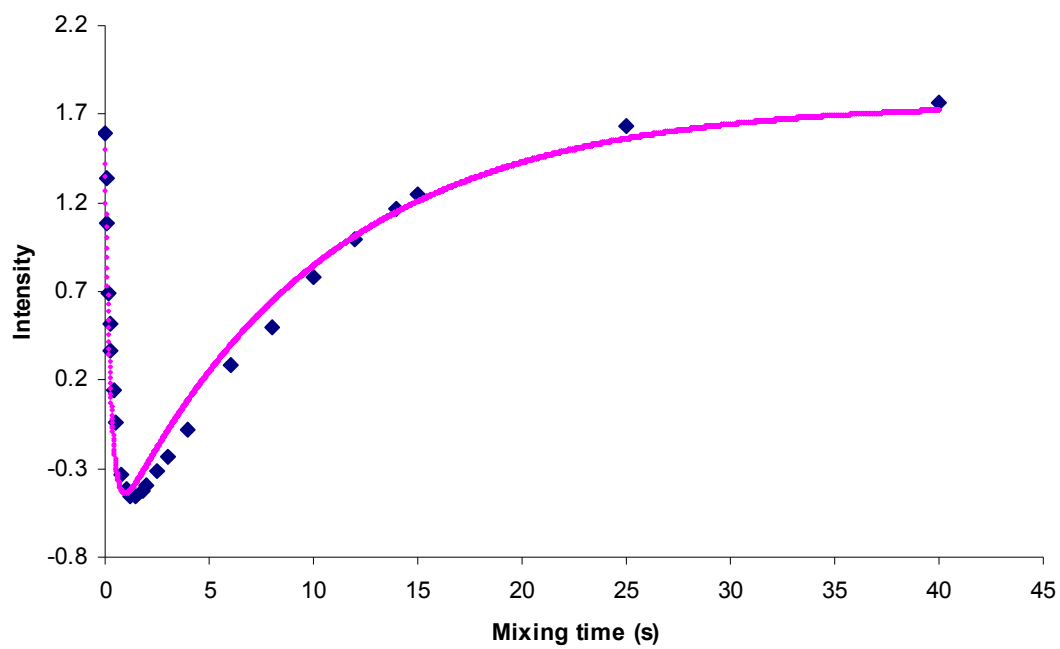

**Figure 30.** Inversed-recovery  $\alpha$ -proton (*trans*) for compound **5** at 83°C in D<sub>2</sub>O

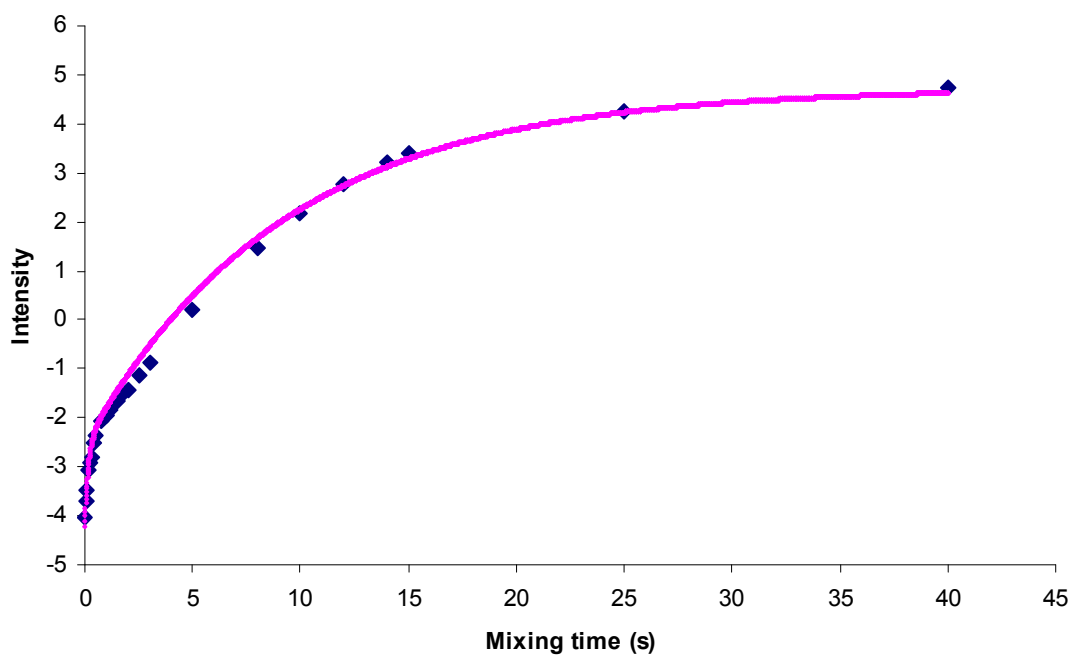

**Figure 31.** Inversed  $\alpha$ -proton (*cis*) for compound **5** at 89°C in D<sub>2</sub>O

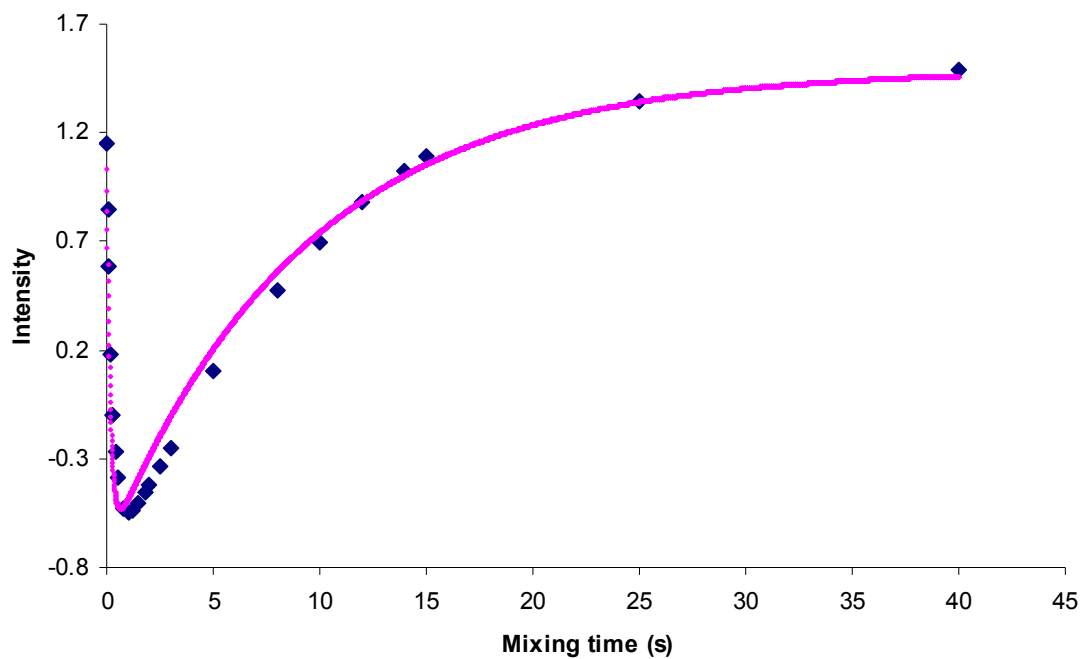

**Figure 32.** Inversed-recovery  $\alpha$ -proton (*trans*) for compound **5** at 89°C in D<sub>2</sub>O

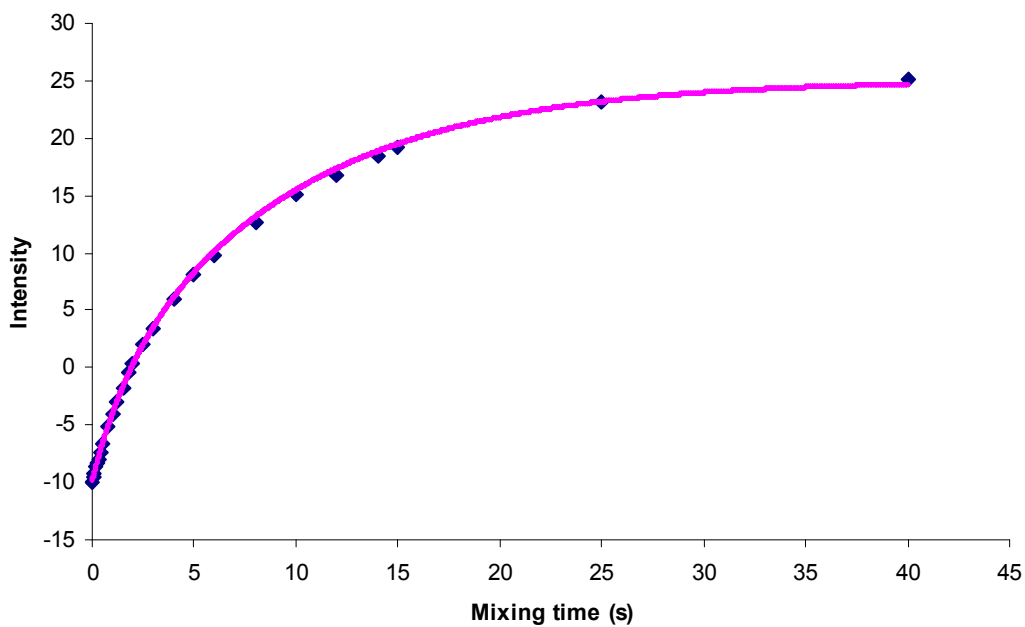

**Figure 33.** Inversed  $\alpha$ -proton (*trans*) for compound **6** at 62°C in D<sub>2</sub>O

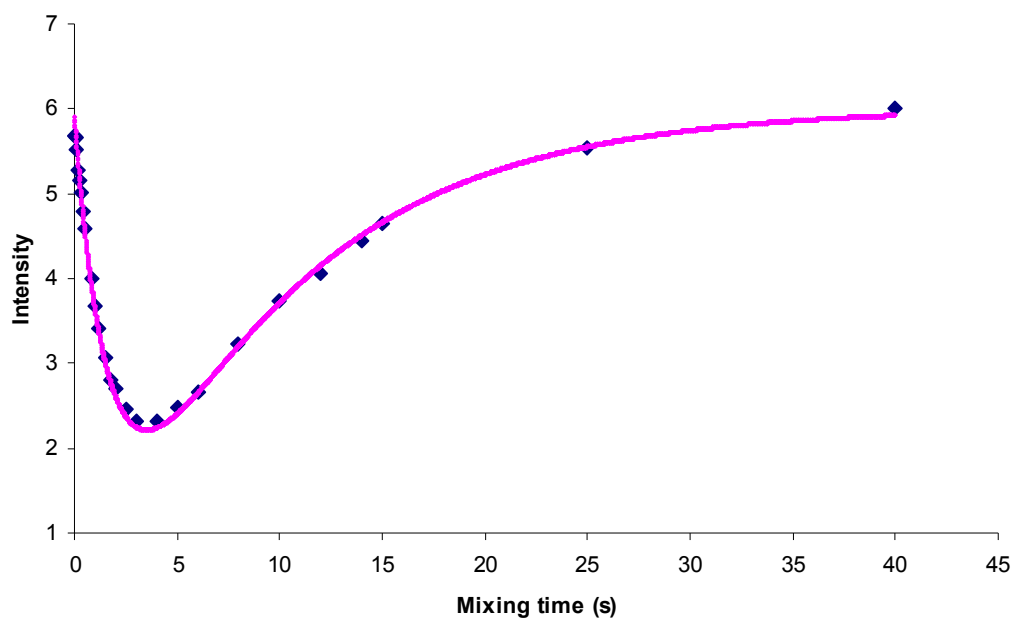

**Figure 34.** Inversed-recovery  $\alpha$ -proton (*cis*) for compound **6** at 62°C in D<sub>2</sub>O

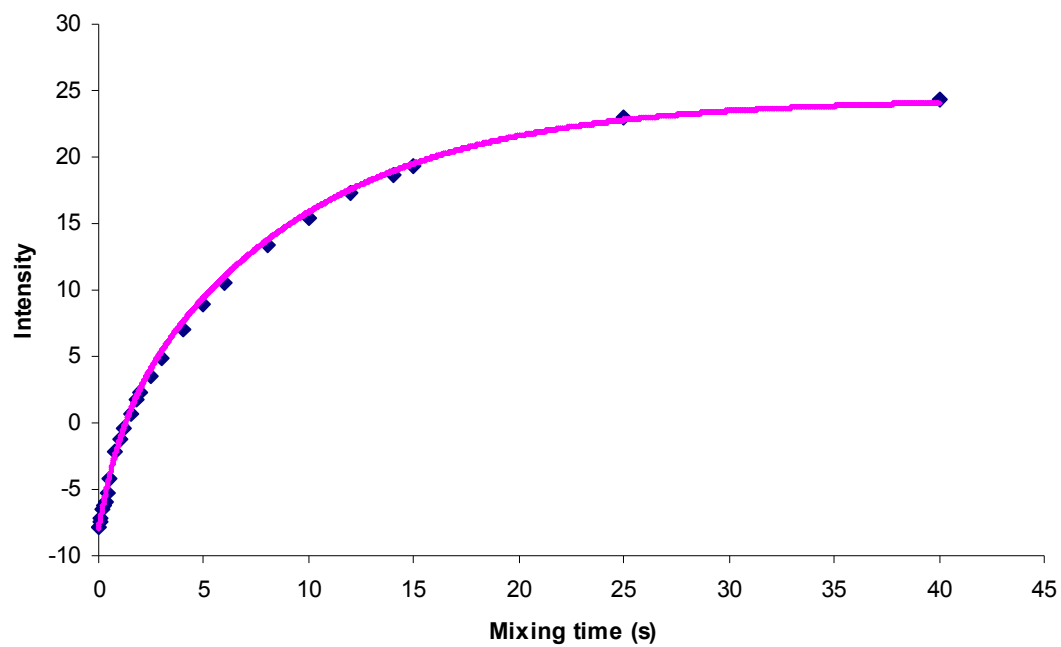

**Figure 35.** Inverted  $\alpha$ -proton (*trans*) for compound 6 at 67°C in D<sub>2</sub>O

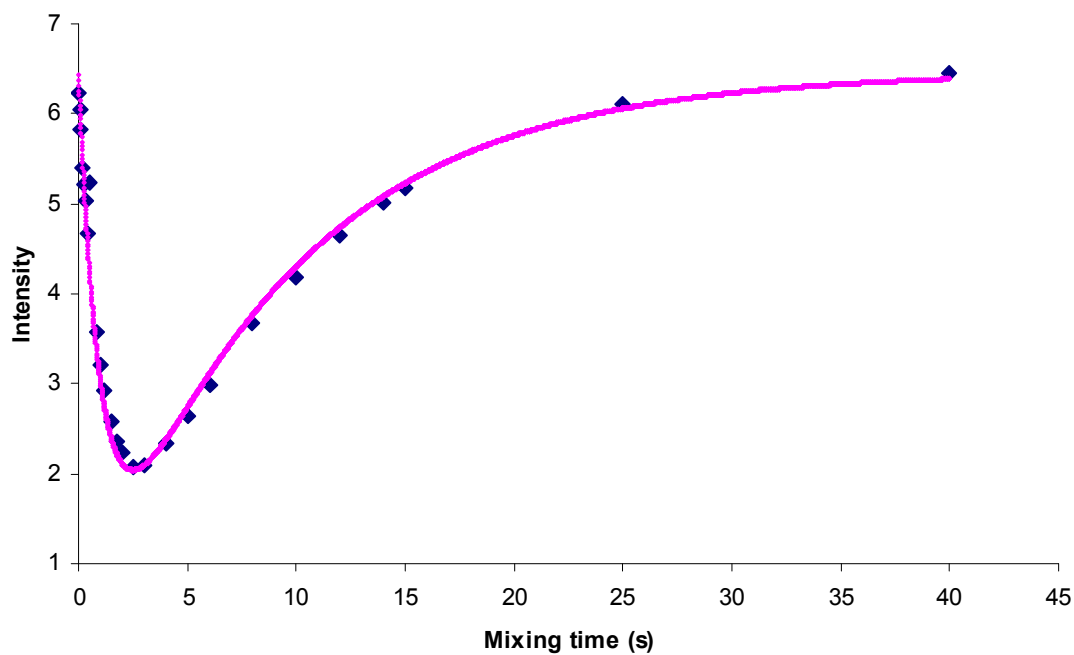

**Figure 36.** Inverted-recovery  $\alpha$ -proton (*cis*) for compound 6 at 67°C in D<sub>2</sub>O

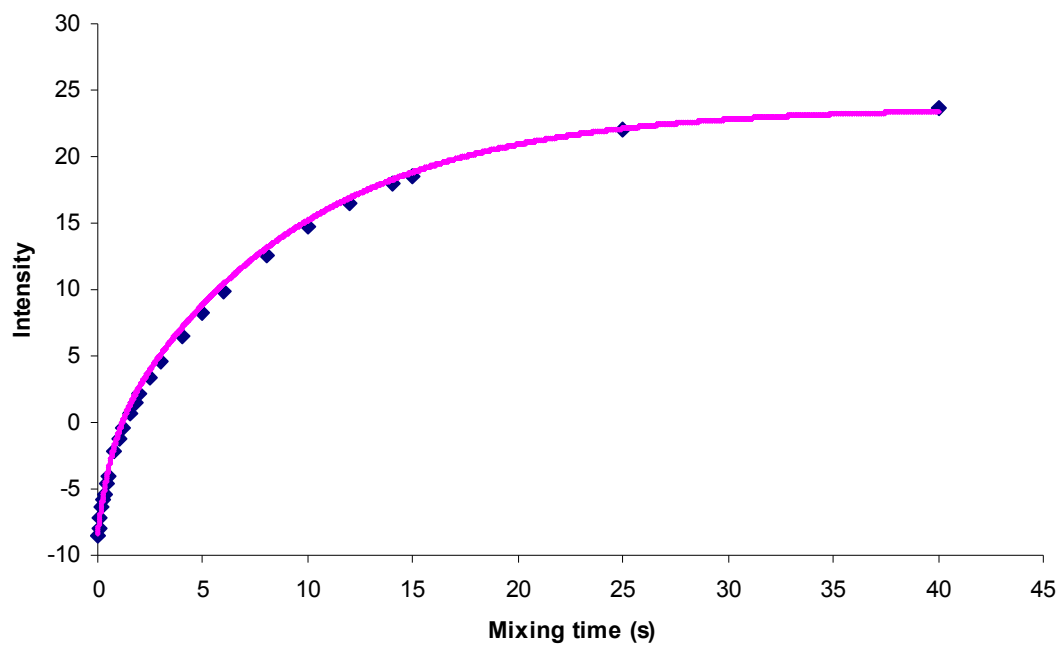

**Figure 37.** Inversed  $\alpha$ -proton (*trans*) for compound **6** at 73°C in D<sub>2</sub>O

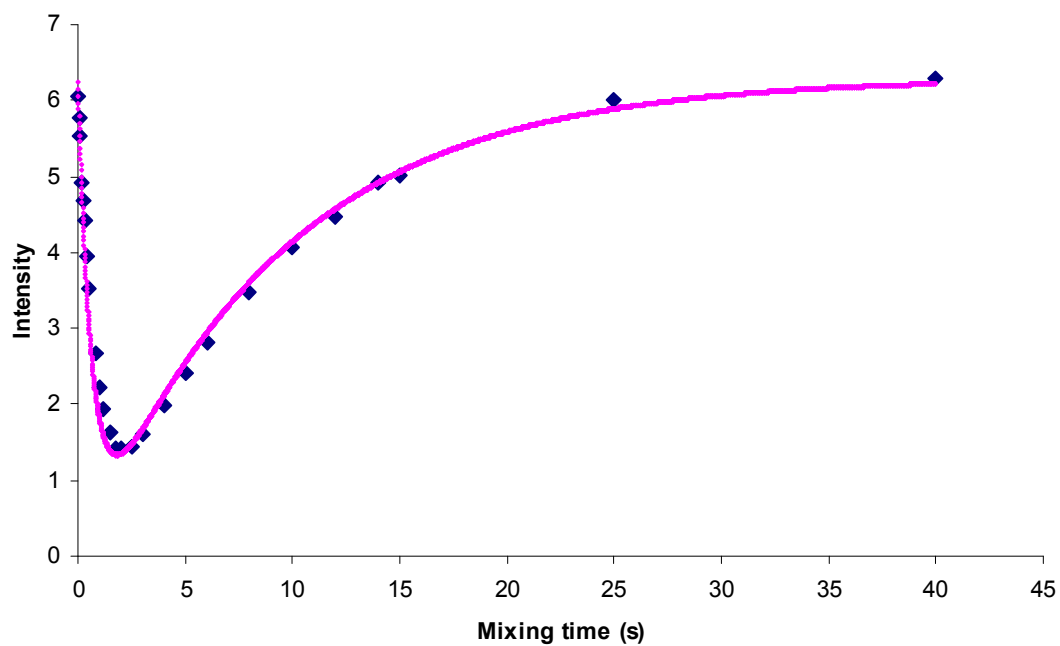

**Figure 38.** Inversed-recovery  $\alpha$ -proton (*cis*) for compound **6** at 73°C in D<sub>2</sub>O

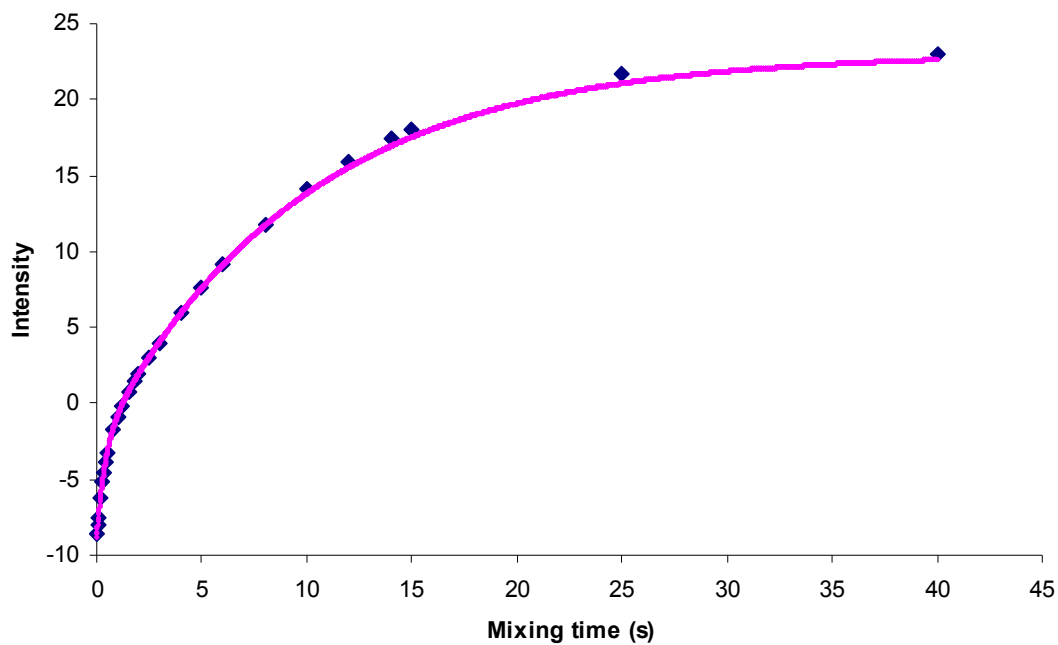

**Figure 39.** Inversed  $\alpha$ -proton (*trans*) for compound **6** at 78°C in D<sub>2</sub>O

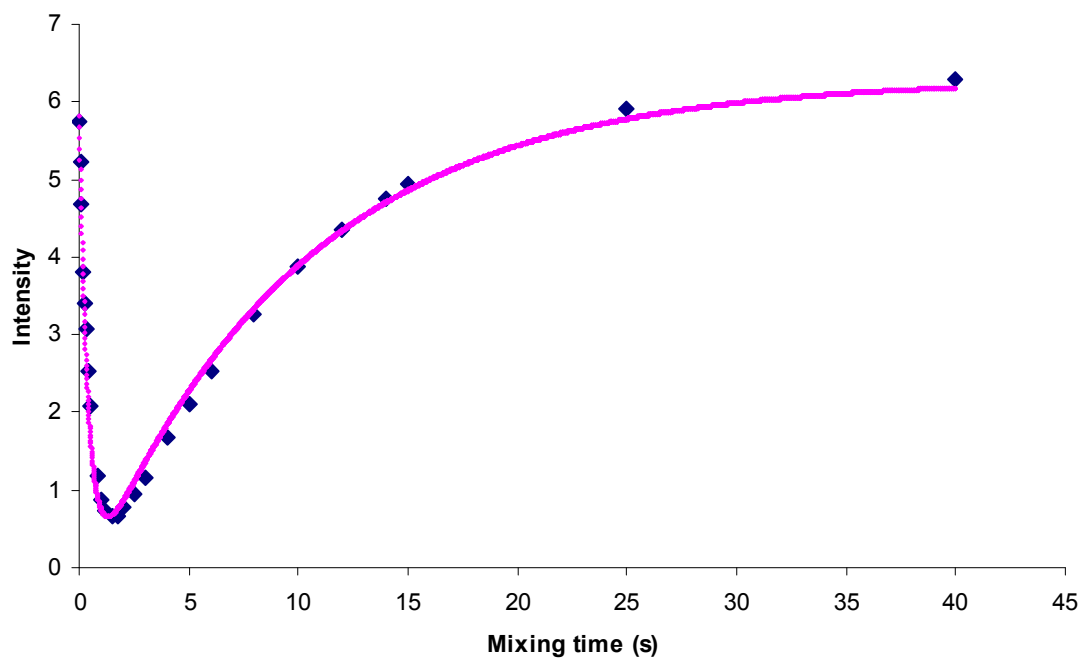

**Figure 40.** Inversed-recovery  $\alpha$ -proton (*cis*) for compound **6** at 78°C in D<sub>2</sub>O



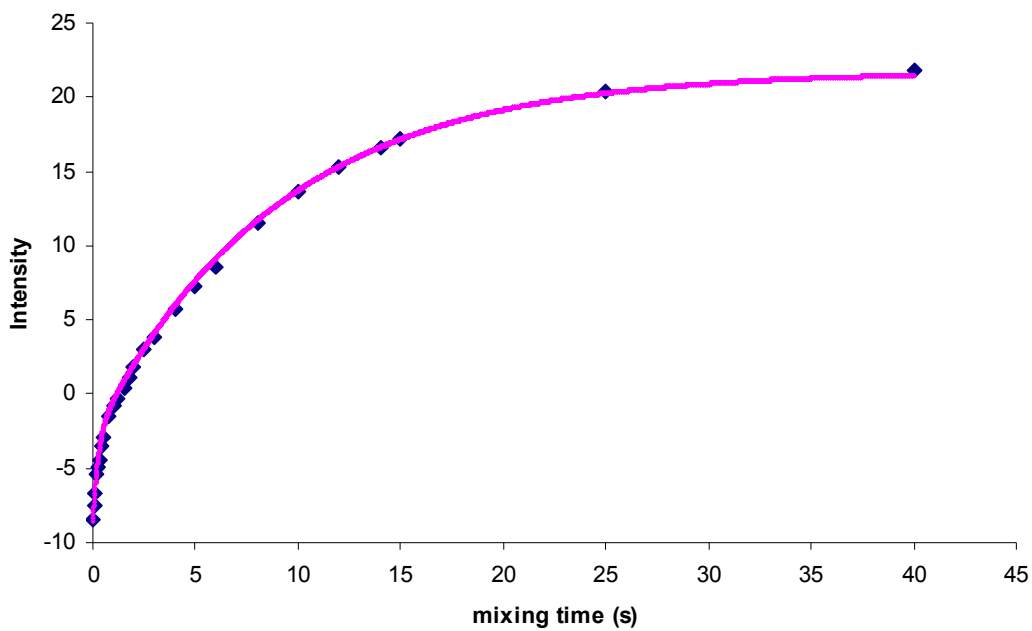

**Figure 41.** Inverted  $\alpha$ -proton (*trans*) for compound **6** at 83°C in D<sub>2</sub>O

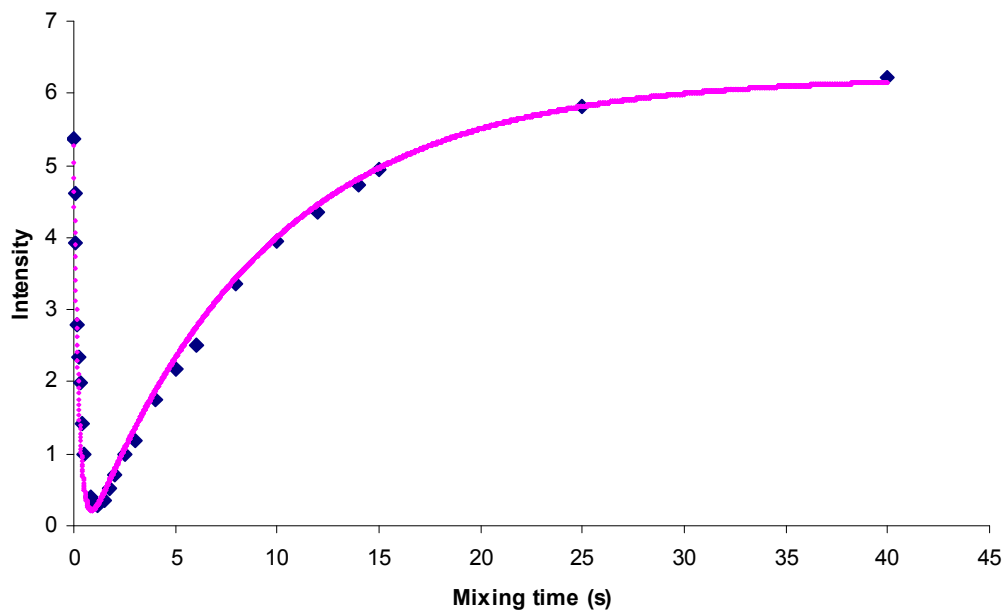

**Figure 42.** Inverted-recovery  $\alpha$ -proton (*cis*) for compound **6** at 83°C in D<sub>2</sub>O

**Table 1. Data for Inversion-Magnetization Transfer Experiment**

| Temp. (°C) | 93       | 91    | 89    | 86    | 83    | 81     | 78  | 73    | 67    | 62    | 57    | 52    | 46    |       |
|------------|----------|-------|-------|-------|-------|--------|-----|-------|-------|-------|-------|-------|-------|-------|
| Temp. (K)  | 366      | 364   | 362   | 359   | 356   | 354    | 351 | 346   | 340   | 335   | 330   | 325   | 319   |       |
| 3          | $k_{ct}$ | 0.494 | 0.400 | 0.324 | 0.255 | 0.182  | -   | -     | -     | -     | -     | -     | -     |       |
|            | $k_{tc}$ | 0.208 | 0.169 | 0.135 | 0.107 | 0.076  | -   | -     | -     | -     | -     | -     | -     |       |
| 4          | $k_{ct}$ | -     | -     | -     | -     | 16.186 | -   | -     | -     | 4.240 | 2.984 | 1.592 | 0.966 | 0.554 |
|            | $k_{tc}$ | -     | -     | -     | -     | 19.820 | -   | -     | -     | 5.118 | 3.125 | 1.949 | 1.184 | 0.679 |
| 5          | $k_{ct}$ | -     | -     | 4.347 | -     | 2.634  | -   | 1.669 | 1.053 | -     | 0.363 | -     | -     | -     |
|            | $k_{tc}$ | -     | -     | 1.632 | -     | 1.022  | -   | 0.610 | 0.390 | -     | 0.139 | -     | -     | -     |
| 6          | $k_{ct}$ | -     | -     | -     | -     | 2.947  | -   | 1.812 | 1.111 | 0.666 | 0.386 | -     | -     | -     |
|            | $k_{tc}$ | -     | -     | -     | -     | 0.818  | -   | 0.497 | 0.295 | 0.177 | 0.102 | -     | -     | -     |

**Table 2. Equations for Eyring plots**

| Compd    | Equation                                | Slope $\pm$ SE    | Intercept $\pm$ SE |
|----------|-----------------------------------------|-------------------|--------------------|
| <b>3</b> | <i>Cis-trans</i> $y = -13.15 x + 29.34$ | $-13.15 \pm 0.08$ | $29.33 \pm 0.22$   |
|          | <i>Trans-cis</i> $y = -13.30 x + 28.88$ | $-13.30 \pm 0.08$ | $28.88 \pm 0.22$   |
| <b>4</b> | <i>Cis-trans</i> $y = -9.96 x + 24.86$  | $-9.96 \pm 0.06$  | $24.86 \pm 0.18$   |
|          | <i>Trans-cis</i> $y = -9.85 x + 24.73$  | $-9.85 \pm 0.08$  | $24.73 \pm 0.26$   |
| <b>5</b> | <i>Cis-trans</i> $y = -10.86 x + 25.58$ | $-10.86 \pm 0.12$ | $25.58 \pm 0.35$   |
|          | <i>Trans-cis</i> $y = -10.83 x + 24.54$ | $-10.83 \pm 0.13$ | $24.54 \pm 0.38$   |
| <b>6</b> | <i>Cis-trans</i> $y = -11.04 x + 26.18$ | $-11.04 \pm 0.04$ | $26.18 \pm 0.13$   |
|          | <i>Trans-cis</i> $y = -11.33 x + 25.71$ | $-11.33 \pm 0.05$ | $25.71 \pm 0.15$   |

$\Delta H^\ddagger$ ,  $\Delta S^\ddagger$ ,  $\Delta G^\ddagger$  were calculated by the following equations:

$$\Delta H^\ddagger = \text{Slope} \times R \times 1000, \quad \Delta(\Delta H^\ddagger) = (\Delta \text{Slope}) \times R \quad (3)$$

$$\Delta S^\ddagger = (\text{Intercept} - \ln(k_B/h)) \times R, \quad \Delta(\Delta S^\ddagger) = (\Delta \text{Intercept}) \times R \quad (4)$$

$$\Delta G^\ddagger = \Delta H^\ddagger - T\Delta S^\ddagger \quad \Delta(\Delta G^\ddagger) = \Delta(\Delta H^\ddagger) + T\Delta(\Delta S^\ddagger) \quad (5)$$

$$R = 8.3145. \quad k_B = 1.381 \cdot 10^{-23} \text{ J K}^{-1}, \quad h = 6.626 \cdot 10^{-34} \text{ J s}$$

**Thermodynamics.** The equilibrium constants for the interconversion of the *cis* and *trans* isomers of **3-6** were determined by measuring the peak area of the <sup>1</sup>H resonance for the two isomers. Peak areas were measured with the program Spinworks 2.5. Experiments were conducted at 298-360 K. Equilibrium constants ( $K_{t/c} = \text{trans/cis}$  ratios) were calculated directly from the peak areas.

**Table 3. Data for various temperature NMR experiments**

| $\text{Ln}K_{(t/c)}$ values for compounds <b>3-6</b> at various temperatures |       |        |       |        |       |        |       |        |       |        |        |        |        |        |
|------------------------------------------------------------------------------|-------|--------|-------|--------|-------|--------|-------|--------|-------|--------|--------|--------|--------|--------|
| Temperature (°C)                                                             | 93    | 91     | 89    | 86     | 83    | 81     | 78    | 73     | 67    | 62     | 51     | 41     | 30     | 25     |
| Temperature (K)                                                              | 366   | 364    | 362   | 359    | 356   | 354    | 351   | 346    | 340   | 335    | 324    | 314    | 303    | 298    |
| $1/T \times 10^3$                                                            | 2.732 | 2.747  | 2.762 | 2.786  | 2.809 | 2.825  | 2.849 | 2.890  | 2.941 | 2.985  | 3.086  | 3.185  | 3.300  | 3.356  |
| <b>3</b>                                                                     | 0.788 | -      | 0.859 | -      | 0.900 | -      | -     | 0.952  | -     | -      | 1.105  | 1.211  | -      | 1.335  |
| <b>4</b>                                                                     | -     | -0.136 | -     | -0.144 | -     | -0.172 | -     | -0.203 | -     | -0.246 | -0.236 | -0.248 | -0.288 | -0.294 |
| <b>5</b>                                                                     | -     | -      | 1.258 | -      | 1.286 | -      | 1.316 | 1.348  | -     | 1.401  | 1.442  | 1.562  | -      | 1.586  |
| <b>6</b>                                                                     | -     | -      | -     |        | 1.330 | -      | 1.361 | 1.394  | 1.428 | 1.463  | 1.526  | 1.581  | 1.639  | 1.664  |

$\text{Ln}K_{(t/c)}$  values for , Ac-3(*S*)-GlcPro-OMe(**3**),Ac-3(*R*)-GlcPro-OMe(**4**) Ac-3(*S*)-OH-Pro-OMe (**5**) and Ac-Pro-OMe (**6**)

**Table 4. *Van't Hoff* plots for  $K_{t/c}$**

| Compd    | Equation               | Slope $\pm$ SE     | Intercept $\pm$ SE |
|----------|------------------------|--------------------|--------------------|
| <b>3</b> | $y = 0.838 x - 1.475$  | $0.838 \pm 0.033$  | $-1.475 \pm 0.010$ |
| <b>4</b> | $y = -0.247 x + 0.527$ | $-0.247 \pm 0.028$ | $0.527 \pm 0.085$  |
| <b>5</b> | $y = 0.546 x - 0.242$  | $0.546 \pm 0.014$  | $-0.242 \pm 0.042$ |
| <b>6</b> | $y = 0.607 x - 0.361$  | $0.607 \pm 0.019$  | $-0.361 \pm 0.060$ |

$\Delta H^\circ$ ,  $\Delta S^\circ$ ,  $\Delta G^\circ$  were calculated by the following equations:

$$\Delta H^\circ = \text{slope} \times R \times 1000, \quad \Delta(\Delta H^\circ) = \Delta \text{slope} \times R \quad (6)$$

$$\Delta S^\circ = \text{intercept} \times R, \quad \Delta(\Delta S^\circ) = \Delta \text{intercept} \times R \quad (7)$$

$$\Delta G^\circ = \Delta H^\circ - T\Delta S^\circ \quad \Delta(\Delta G^\circ) = \Delta(\Delta H^\circ) + T\Delta(\Delta S^\circ) \quad (8)$$

$R = 8.3145$ .

**FT-IR spectroscopy.** Samples of **3-6** were prepared at concentration of 0.10 M in D<sub>2</sub>O. Spectra were recorded on a FTIR spectrometer. Experiments were performed at 25 °C using CaF<sub>2</sub> in a Spectra Tech circle cell. The frequency of amide I vibrational modes was determined to within 2 cm<sup>-1</sup>.

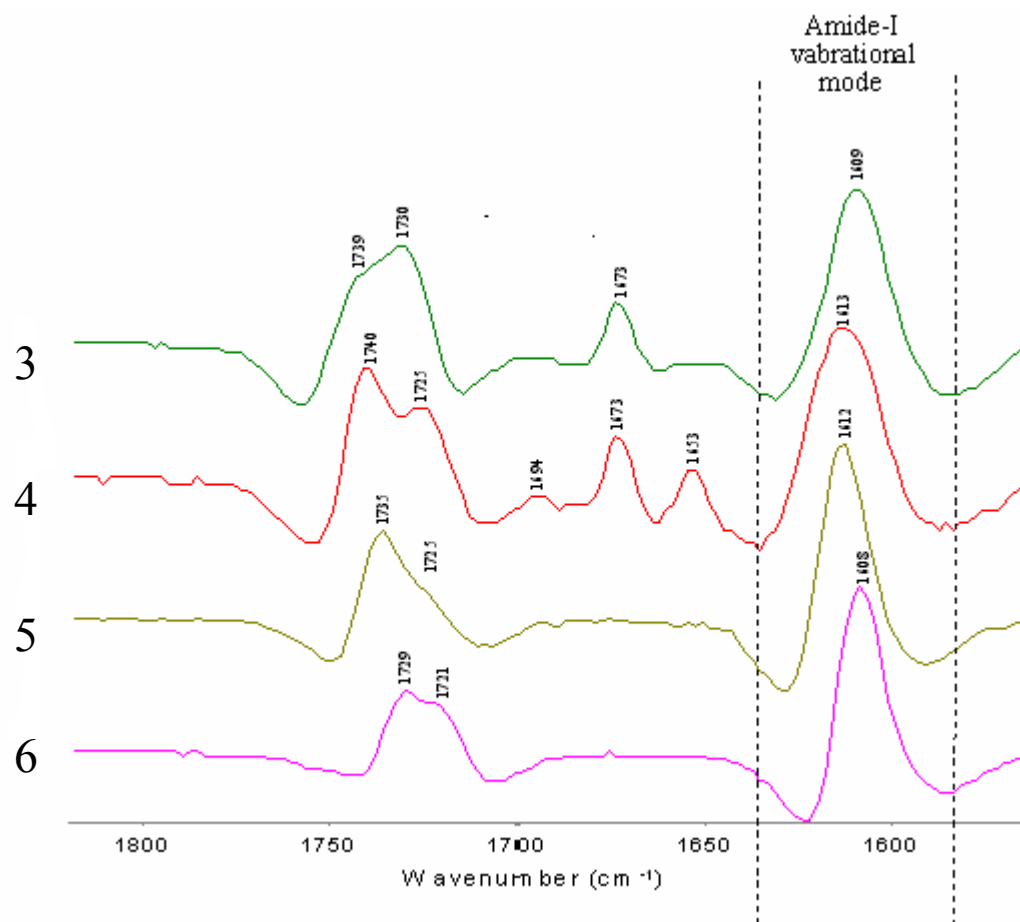

**Figure 43.** FT-IR spectra of amide-I (C=O) vibrational mode for compounds **3-6**.

**Temperature coefficient ( $\Delta\delta/\Delta T$ ) experiment:** 1D  $^1\text{H}$ -NMR spectroscopy of 17mM solutions of **3** and **4** in 100.0%  $\text{Me}_2\text{SO}-d_6$  were recorded on 500MHz NMR spectrometer at 20  $^\circ\text{C}$ , and from 20 to 45  $^\circ\text{C}$  with increments of 5  $^\circ\text{C}$ , using routine techniques. Chemical shift ( $\delta$ ) are expressed in ppm and calibrated with respect to the residual DMSO signal ( $^1\text{H}$ : 2.49 ppm).

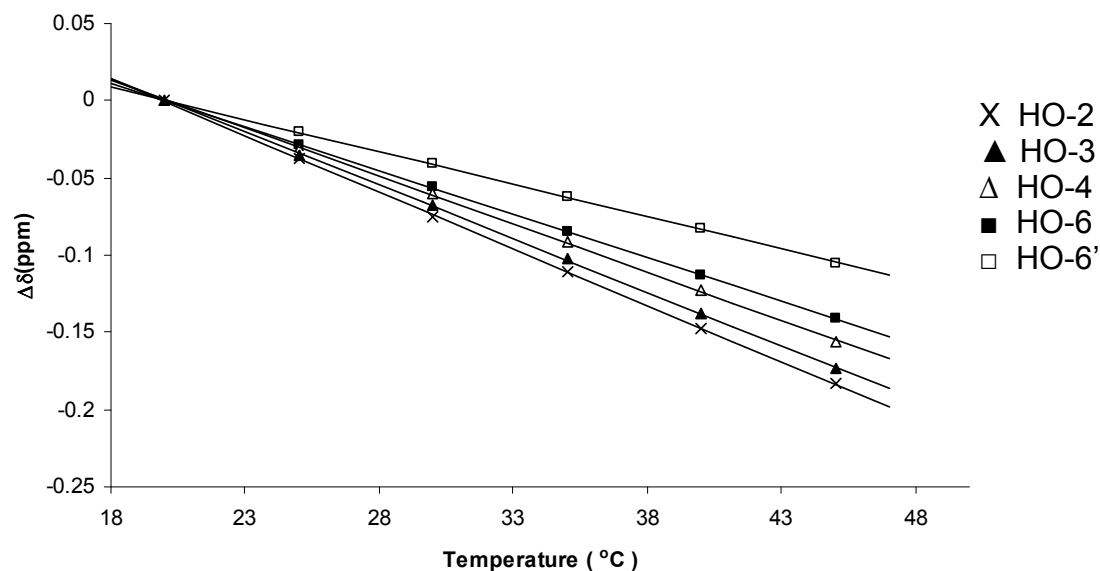

**Figure 44.** Temperature dependence of hydroxyl proton resonances of the *cis* isomer of Ac-3'(R)-GlcPro-OMe (**3**) in  $\text{DMSO}-d_6$ .

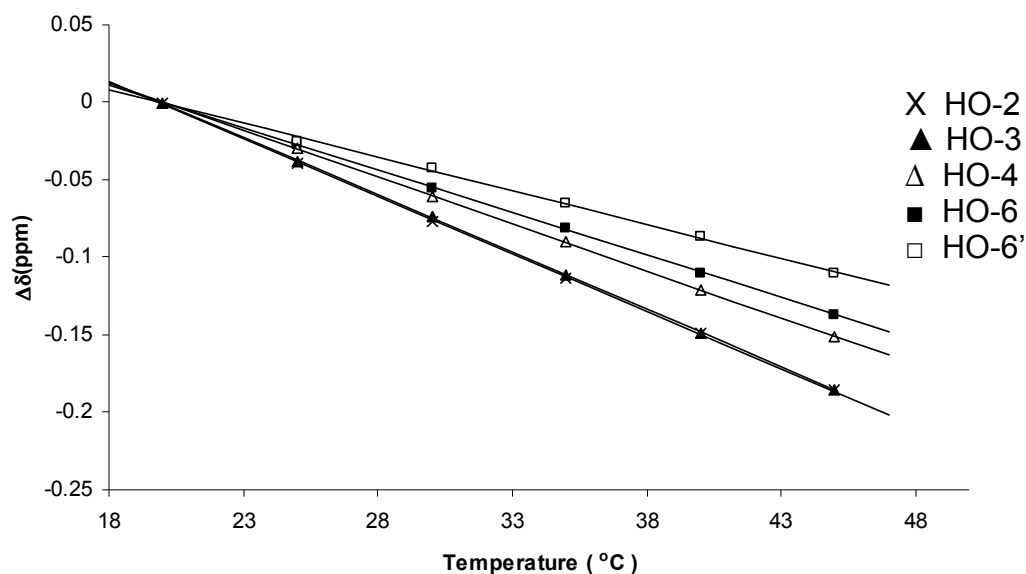

**Figure 45.** Temperature dependence of hydroxyl proton resonances of the *trans* isomer of Ac-3'(R)-GlcPro-OMe (**3**) in  $\text{DMSO}-d_6$ .

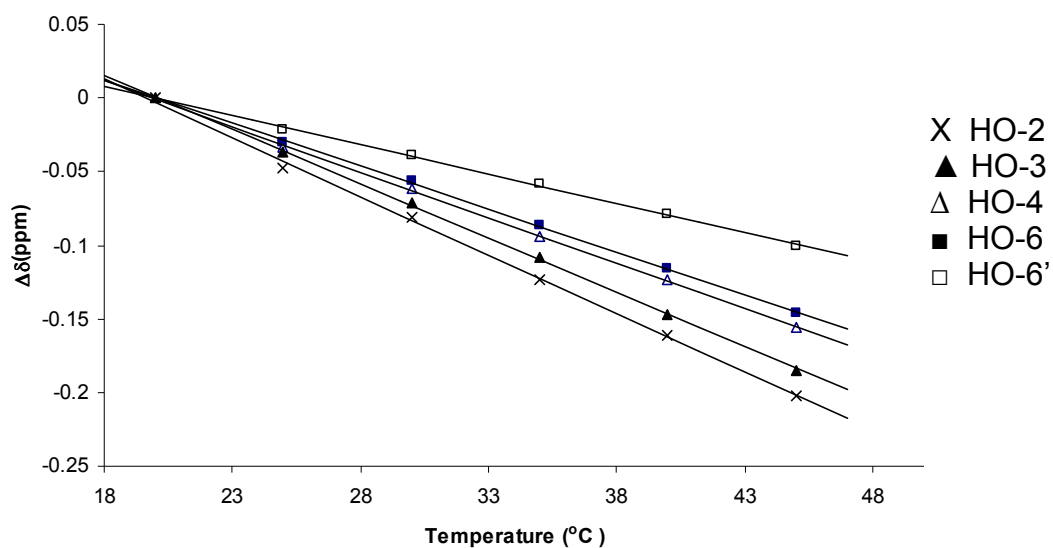

**Figure 46** Temperature dependence of hydroxyl proton resonances of the *cis* isomer of Ac-3'(*R*)-GlcPro-OMe (4) in DMSO-*d*<sub>6</sub>.

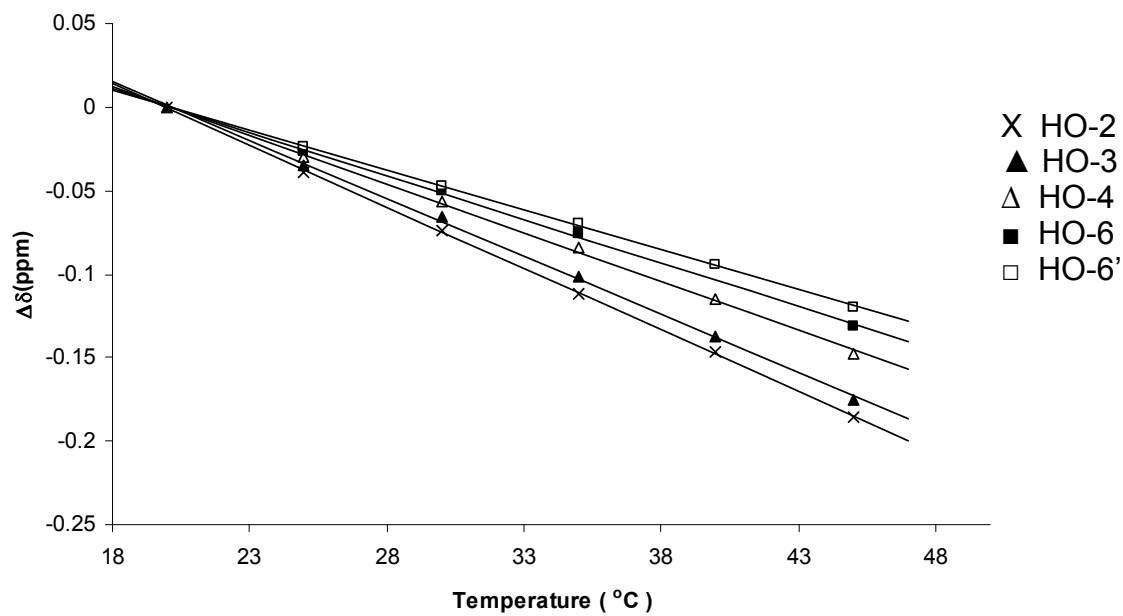

**Figure 47.** Temperature dependence of hydroxyl proton resonances of the *trans* isomer of Ac-3'(*R*)-GlcPro-OMe (4) in DMSO-*d*<sub>6</sub>.

## Computational Methods

A computational approach was used for detailed structural assignments and determination of the conformational distributions of compounds **3** and **4** in water. Due to the complexity of the potential energy surface of these compounds, a systematic conformational search routine was employed. First, the MMFF94 force field implemented in the SPARTAN '02 program was used to generate an initial set of trial structures or conformers. Specifically, a Monte-Carlo or random conformational search was performed starting from an initial energy minimized guess structure drawn in SPARTAN. Although Monte-Carlo was designed to fairly sample all regions of the conformational space, one cannot guarantee that all lowest energy conformers are located. As a result of this limitation in the random sampling technique, some very important conformers might be missed during the search. To avoid this inherent problem, we adopted a strategy of searching the conformational space by re-starting the search with different initial conformations and checking for the completeness of the analysis. Once a redundant outcome was observed, we assumed that the conformational space was fully covered and the conformations were gathered. This 'build and search' approach identified a set of 2700 structures for each compound (**3** and **4**). However, when these structures were superimposed, a set of 443 unique conformers for compound **3** and 457 for compound **4** were isolated.

Once the unique local minima were identified using MMFF94, the remaining conformers were used as guess structures (input structures) for gas phase B3LYP/6-31+G(d, p) optimizations as implemented in the GAUSSIAN 03 program package<sup>1</sup>. Full B3LYP/6-31+G(d, p) optimizations lead to 443 and 453 unique conformers for compounds **3** and **4**, respectively. All B3LYP structures were real local minima as characterized by the absence of imaginary frequencies.

Subsequently, solvent effects were taken into account through re-optimization of the gas-phase B3LYP/6-31+G(d, p) minima in water at the same level of theory using Tomasi's Polarized Continuum Model (PCM). This led to only 355 and 258 real local minima for compounds **3** and **4**, respectively.

The remaining structures either had large imaginary frequencies, which were very difficult to avoid, or the structures were difficult to converge. When the SCF convergence behavior for structures with convergence problems was checked by analyzing the energy change for each iterative step, it was found that there is no dramatic change in their energy from one step to the next. Moreover, these structures are at a higher energy level compared to the collected conformers, which suggests that they are relatively unimportant for our total analysis. Thus, such structures were discarded after repeated attempts to reach convergence had failed.

Using the B3LYP optimized geometries in water, the total free energies of each conformer were calculated. The total free energies were subsequently used to determine the *cis/trans* ratio of the local minima according to a Boltzmann distribution (Boltzmann statistics) calculated at 25 °C. In Tables 5 and 6, we report data for the most stable conformers **3** and **4**. Only those conformers have been listed in the tables that have a statistical weight of at least 0.5%, according to the Boltzmann distribution. For each conformer, we provide the total energy, statistical weight, as well as various torsion angles (key geometry parameters.) The calculated dipole moment has been included for future reference since it has a strong influence on the free energy of solvation.



**TABLE 5: Backbone Torsion Angles, Endocyclic Torsion Angles, and Conformational Distribution of Cis-Trans Isomers of Compound 3, which are optimized at the B3LYP/6-31+G(d) Level of Theory in the Water.**

| Conformers  | B3LYP/6-31+G(d)                                 |                           | Dipole<br>moment <sup>b</sup><br>In H <sub>2</sub> O | Backbone Torsion Angles and Endocyclic Torsion Angles <sup>a</sup> |         |         |          |          |          |          |          |          |
|-------------|-------------------------------------------------|---------------------------|------------------------------------------------------|--------------------------------------------------------------------|---------|---------|----------|----------|----------|----------|----------|----------|
|             | H <sub>2</sub> O (a.u.)<br>Total Free<br>Energy | Conformer<br>Distribution |                                                      | $\omega'$                                                          | $\phi$  | $\psi$  | $\omega$ | $\chi^1$ | $\chi^2$ | $\chi^3$ | $\chi^4$ | $\chi^0$ |
| Conformer1  | -1279.15805900                                  | 4.70017076                | 5.1329                                               | 175.253                                                            | -64.198 | 153.736 | 177.502  | 28.915   | -34.773  | 26.879   | -8.378   | -13.164  |
| Conformer2  | -1279.15797400                                  | 4.29548658                | 5.6868                                               | 174.849                                                            | -63.973 | 153.458 | 177.498  | 29.437   | -34.414  | 25.781   | -6.852   | -14.482  |
| Conformer3  | -1279.15786500                                  | 3.82710817                | 7.6872                                               | 175.55                                                             | -61.41  | -28.681 | -179.498 | 27.616   | -33.469  | 26.027   | -8.356   | -12.356  |
| Conformer4  | -1279.15761700                                  | 2.94297812                | 8.8327                                               | 175.706                                                            | -61.659 | -28.731 | -179.405 | 28.154   | -34.144  | 26.603   | -8.633   | -12.497  |
| Conformer5  | -1279.15749700                                  | 2.59170305                | 9.6162                                               | 175.751                                                            | -61.884 | -28.605 | -179.79  | 28.405   | -34.608  | 27.1     | -8.983   | -12.439  |
| Conformer6  | -1279.15748700                                  | 2.56439600                | 5.7266                                               | 175.486                                                            | -61.371 | -28.421 | -178.709 | 27.881   | -33.682  | 26.107   | -8.272   | -12.569  |
| Conformer7  | -1279.15748500                                  | 2.55896921                | 6.6757                                               | 174.313                                                            | -64.422 | 153.418 | 177.149  | 30.688   | -34.505  | 24.71    | -4.861   | -16.547  |
| Conformer8  | -1279.15744600                                  | 2.45541259                | 6.9431                                               | 174.809                                                            | -63.748 | 153.48  | 177.554  | 29.199   | -34.614  | 26.354   | -7.622   | -13.835  |
| Conformer9  | -1279.15733500                                  | 2.18304566                | 7.5057                                               | 176.059                                                            | -61.619 | -29.02  | -179.011 | 27.947   | -34.48   | 27.349   | -9.547   | -11.775  |
| Conformer10 | -1279.15718900                                  | 1.87025420                | 12.0112                                              | 177.627                                                            | -67.256 | 154.625 | 176.597  | 27.487   | -33.487  | 26.314   | -8.613   | -12.088  |
| Conformer11 | -1279.15718800                                  | 1.86827423                | 10.7905                                              | -10.903                                                            | -63.708 | 154.37  | 177.909  | 31.884   | -34.728  | 23.936   | -3.193   | -18.36   |
| Conformer12 | -1279.15716100                                  | 1.81560020                | 7.8150                                               | 174.055                                                            | -64.29  | 153.729 | 177.029  | 30.79    | -34.36   | 24.383   | -4.444   | -16.879  |
| Conformer13 | -1279.15711000                                  | 1.72012283                | 7.2059                                               | 175.399                                                            | -61.183 | -29.02  | -179.311 | 28.093   | -33.767  | 26.084   | -8.126   | -12.779  |
| Conformer14 | -1279.15705000                                  | 1.61420453                | 7.5512                                               | -10.713                                                            | -64.058 | 153.755 | 177.811  | 31.792   | -34.917  | 24.354   | -3.726   | -17.943  |
| Conformer15 | -1279.15704400                                  | 1.60397824                | 7.5835                                               | -10.972                                                            | -63.957 | 154.078 | 177.621  | 31.89    | -35.01   | 24.411   | -3.721   | -18.01   |
| Conformer16 | -1279.15700800                                  | 1.54396672                | 11.3666                                              | 177.548                                                            | -66.781 | 154.711 | 177.005  | 27.948   | -33.772  | 26.306   | -8.315   | -12.573  |
| Conformer17 | -1279.15696000                                  | 1.46742941                | 8.3907                                               | -10.68                                                             | -62.642 | -27.379 | -177.946 | 30.963   | -34.117  | 23.815   | -3.727   | -17.428  |
| Conformer18 | -1279.15685100                                  | 1.30742140                | 5.3364                                               | -10.749                                                            | -63.601 | 153.891 | 177.725  | 31.447   | -34.857  | 24.607   | -4.229   | -17.401  |
| Conformer19 | -1279.15682900                                  | 1.27730691                | 7.4783                                               | 175.365                                                            | -61.205 | -29.374 | -178.796 | 28.155   | -33.865  | 26.186   | -8.187   | -12.779  |
| Conformer20 | -1279.15674100                                  | 1.16362742                | 8.7979                                               | 175.163                                                            | -61.389 | -28.169 | -179.668 | 28.332   | -34.102  | 26.377   | -8.261   | -12.856  |
| Conformer21 | -1279.15672900                                  | 1.14893052                | 6.7307                                               | -9.63                                                              | -62.972 | -27.043 | -177.84  | 30.548   | -34.302  | 24.547   | -4.794   | -16.464  |
| Conformer22 | -1279.15669700                                  | 1.11063994                | 10.8316                                              | -1.733                                                             | -70.669 | 153.388 | 177.641  | 33.395   | -35.71   | 23.807   | -2.004   | -20.045  |
| Conformer23 | -1279.15669000                                  | 1.10243549                | 9.4318                                               | 178.559                                                            | -64.409 | -27.738 | -179.68  | 26.06    | -33.108  | 27.07    | -10.435  | -9.993   |
| Conformer24 | -1279.15668300                                  | 1.09429164                | 3.8631                                               | -9.77                                                              | -62.77  | -27.496 | -177.25  | 30.428   | -34.185  | 24.488   | -4.807   | -16.378  |
| Conformer25 | -1279.15666800                                  | 1.07704254                | 10.8443                                              | -1.876                                                             | -71.231 | 153.371 | 177.594  | 33.611   | -35.857  | 23.82    | -1.878   | -20.26   |

|             |                |            |         |         |         |         |          |        |         |        |         |         |
|-------------|----------------|------------|---------|---------|---------|---------|----------|--------|---------|--------|---------|---------|
| Conformer26 | -1279.15665800 | 1.06569446 | 5.4082  | -9.889  | -62.33  | -27.827 | -177.096 | 30.101 | -33.876 | 24.28  | -4.792  | -16.197 |
| Conformer27 | -1279.15664700 | 1.05334962 | 10.8863 | 170.248 | -56.04  | -29.592 | -178.56  | 26.461 | -35.759 | 30.851 | -14.224 | -7.808  |
| Conformer28 | -1279.15663300 | 1.03784461 | 8.3676  | 169.778 | -59.198 | 153.487 | 176.826  | 28.366 | -36.2   | 29.719 | -11.737 | -10.635 |
| Conformer29 | -1279.15661600 | 1.01932360 | 4.5373  | 175.556 | -60.875 | -29.808 | -178.657 | 27.684 | -33.658 | 26.29  | -8.615  | -12.196 |
| Conformer30 | -1279.15660500 | 1.00751591 | 10.1026 | 177.233 | -66.961 | 154.345 | 176.976  | 27.794 | -33.45  | 25.946 | -8.031  | -12.662 |
| Conformer31 | -1279.15658100 | 0.98222629 | 5.4440  | 174.626 | -64.115 | 151.95  | 175.367  | 30.419 | -34.763 | 25.404 | -5.81   | -15.773 |
| Conformer32 | -1279.15656400 | 0.96469783 | 14.3113 | -3.291  | -70.535 | 153.12  | 177.54   | 33.483 | -34.36  | 21.596 | 0.389   | -21.651 |
| Conformer33 | -1279.15655600 | 0.95655772 | 10.1262 | 169.712 | -55.97  | -29.472 | -178.615 | 26.193 | -34.771 | 29.505 | -12.975 | -8.458  |
| Conformer34 | -1279.15654500 | 0.94547711 | 8.5896  | 165.447 | -53.435 | -29.854 | -178.172 | 25.884 | -34.453 | 29.298 | -12.975 | -8.285  |
| Conformer35 | -1279.15654300 | 0.94347629 | 10.1153 | 175.362 | -61.039 | -28.822 | -178.998 | 27.718 | -33.497 | 26     | -8.297  | -12.419 |
| Conformer36 | -1279.15649400 | 0.89575709 | 9.3623  | 166.129 | -53.334 | -30.287 | -178.387 | 25.099 | -34.786 | 30.63  | -14.909 | -6.521  |
| Conformer37 | -1279.15644400 | 0.84955111 | 10.4472 | 178.633 | -63.984 | -28.88  | -178.987 | 25.955 | -33.168 | 27.273 | -10.711 | -9.749  |
| Conformer38 | -1279.15643900 | 0.84506368 | 8.4195  | -9.329  | -62.914 | -27.107 | -178.164 | 30.355 | -34.682 | 25.333 | -5.75   | -15.738 |
| Conformer39 | -1279.15642200 | 0.82998297 | 9.1869  | 164.495 | -56.344 | 152.993 | 176.97   | 28.09  | -36.156 | 29.88  | -12.072 | -10.264 |
| Conformer40 | -1279.15642100 | 0.82910430 | 10.1977 | 171.153 | -56.406 | -29.716 | -177.731 | 25.545 | -35.246 | 30.974 | -14.96  | -6.759  |
| Conformer41 | -1279.15638400 | 0.79723914 | 9.6697  | 165.788 | -53.402 | -30.686 | -177.616 | 25.705 | -34.994 | 30.4   | -14.258 | -7.327  |
| Conformer42 | -1279.15636600 | 0.78218295 | 9.7219  | 175.849 | -61.72  | -28.977 | -179.497 | 28.244 | -34.288 | 26.771 | -8.747  | -12.481 |
| Conformer43 | -1279.15636400 | 0.78052769 | 8.4203  | -9.462  | -62.976 | -27.188 | -177.981 | 30.484 | -34.706 | 25.239 | -5.549  | -15.954 |
| Conformer44 | -1279.15632300 | 0.74735630 | 9.7530  | 165.884 | -53.481 | -30.46  | -177.374 | 25.903 | -35.11  | 30.379 | -14.095 | -7.55   |
| Conformer45 | -1279.15628600 | 0.71863299 | 11.2931 | 170.369 | -56.445 | -29.143 | -178.101 | 25.724 | -34.231 | 29.135 | -12.9   | -8.21   |
| Conformer46 | -1279.15628300 | 0.71635303 | 13.8887 | -3.24   | -70.809 | 153.498 | 177.347  | 33.778 | -34.389 | 21.342 | 0.857   | -22.13  |
| Conformer47 | -1279.15627900 | 0.71332434 | 7.9777  | 171.237 | -56.629 | -29.889 | -177.841 | 25.746 | -35.368 | 30.976 | -14.84  | -6.959  |
| Conformer48 | -1279.15625400 | 0.69468300 | 13.8661 | -3.404  | -71.046 | 153.163 | 177.505  | 33.693 | -34.427 | 21.477 | 0.671   | -21.966 |
| Conformer49 | -1279.15624900 | 0.69101360 | 7.1810  | -11.075 | -63.19  | -28.213 | -177.649 | 31.159 | -33.869 | 23.237 | -2.969  | -18.044 |
| Conformer50 | -1279.15624600 | 0.68882127 | 9.3977  | 163.635 | -56.031 | 153.751 | 176.631  | 28.087 | -35.191 | 28.346 | -10.447 | -11.319 |
| Conformer51 | -1279.15621300 | 0.66515990 | 4.8429  | -9.645  | -62.458 | -27.128 | -177.416 | 30.071 | -33.976 | 24.521 | -5.094  | -15.955 |
| Conformer52 | -1279.15621000 | 0.66304959 | 8.3825  | 176.054 | -61.66  | -28.593 | -179.731 | 27.959 | -34.37  | 27.172 | -9.35   | -11.914 |
| Conformer53 | -1279.15619500 | 0.65259808 | 11.2403 | -3.017  | -71.674 | 153.034 | 177.422  | 34.082 | -34.889 | 21.823 | 0.551   | -22.121 |
| Conformer54 | -1279.15617400 | 0.63824214 | 6.6183  | 165.996 | -53.495 | -30.433 | -177.748 | 25.711 | -35.112 | 30.56  | -14.43  | -7.214  |
| Conformer55 | -1279.15069300 | 0.63756646 | 2.8566  | 176.006 | -41.743 | 132.539 | 178.252  | -5.605 | -14.717 | 29.215 | -34.55  | -25.528 |
| Conformer56 | -1279.15614100 | 0.61631819 | 7.9141  | 178.168 | -63.316 | -28.592 | -178.828 | 25.386 | -32.416 | 26.629 | -10.42  | -9.571  |
| Conformer57 | -1279.15614000 | 0.61566571 | 8.3052  | -11.703 | -64.354 | 153.877 | 177.66   | 32.655 | -34.571 | 22.943 | -1.625  | -19.854 |
| Conformer58 | -1279.15610900 | 0.59577806 | 9.0827  | 165.159 | -53.272 | -30.275 | -177.498 | 25.87  | -34.411 | 29.246 | -12.924 | -8.307  |

|             |                |            |         |         |         |         |          |        |         |        |         |         |
|-------------|----------------|------------|---------|---------|---------|---------|----------|--------|---------|--------|---------|---------|
| Conformer59 | -1279.15607500 | 0.57470371 | 10.3456 | 165.331 | -53.511 | -29.889 | -177.981 | 25.949 | -34.447 | 29.227 | -12.867 | -8.384  |
| Conformer60 | -1279.15606900 | 0.57106285 | 7.5206  | -10.037 | -62.966 | -27.543 | -177.851 | 30.931 | -34.588 | 24.616 | -4.611  | -16.84  |
| Conformer61 | -1279.15605800 | 0.56444775 | 11.9053 | 165.703 | -53.206 | -29.521 | -177.935 | 25.342 | -34.881 | 30.585 | -14.715 | -6.792  |
| Conformer62 | -1279.15604300 | 0.55555047 | 11.3924 | 165.649 | -53.595 | -29.54  | -178.976 | 25.893 | -35.017 | 30.236 | -13.973 | -7.642  |
| Conformer63 | -1279.15599500 | 0.52801080 | 8.9909  | 170.236 | -56.546 | -29.551 | -177.579 | 25.492 | -34.176 | 29.308 | -13.26  | -7.839  |
| Conformer64 | -1279.15598100 | 0.52023862 | 6.9900  | -1.77   | -70.445 | -28.226 | -177.256 | 32.8   | -35.235 | 23.58  | -2.187  | -19.525 |
| Others*     | < 0.5          |            |         |         |         |         |          |        |         |        |         |         |

### Total Population Distribution

|                     | Calc.(%) | Exp. (%) |
|---------------------|----------|----------|
| Total Cis Isomers   | 29.15    | 23       |
| Total Trans Isomers | 70.85    | 77       |

<sup>a</sup> angles are in degrees, <sup>b</sup> units in Debye (D). The relative electronic energies and the relative free energies are in Hartrees. The population distributions were calculated using the Boltzmann statistical weights at 25 °C, including all conformers. In the property table, only those conformers are included that contribute 0.5% or more.

**TABLE 6: Backbone Torsion Angles, Endocyclic Torsion Angles, and Conformational Distribution of Cis-Trans Isomers of Compound 4, which is Optimized at the B3LYP/6-31+G(d) Level of Theory in the Water**

| Conformers  | B3LYP/6-31+G(d)                    |                           | Dipole<br>moment <sup>b</sup><br>In H2O | Backbone Torsion Angles and Endocyclic Torsion Angles <sup>a</sup> |         |         |          |          |          |          |          |          |
|-------------|------------------------------------|---------------------------|-----------------------------------------|--------------------------------------------------------------------|---------|---------|----------|----------|----------|----------|----------|----------|
|             | H2O (a.u.)<br>Total Free<br>Energy | Conformer<br>Distribution |                                         | $\omega'$                                                          | $\phi$  | $\psi$  | $\omega$ | $\chi^1$ | $\chi^2$ | $\chi^3$ | $\chi^4$ | $\chi^0$ |
| Conformer1  | -1279.15838500                     | 4.15042264                | 10.9153                                 | 4.031                                                              | -81.347 | 154.516 | 176.927  | 32.683   | -37.378  | 27.191   | -6.035   | -16.964  |
| Conformer2  | -1279.15837300                     | 4.09800180                | 11.0304                                 | 4.297                                                              | -80.845 | 154.838 | 177.406  | 32.539   | -37.457  | 27.452   | -6.399   | -16.641  |
| Conformer3  | -1279.15835700                     | 4.02913580                | 4.9618                                  | -170.077                                                           | -85.486 | 154.199 | 177.889  | 32.851   | -33.196  | 20.473   | 1.061    | -21.596  |
| Conformer4  | -1279.15822100                     | 3.48858953                | 10.13710                                | 3.902                                                              | -82.254 | 154.02  | 177.165  | 32.835   | -37.137  | 26.661   | -5.391   | -17.464  |
| Conformer5  | -1279.15808700                     | 3.02696829                | 6.5048                                  | -172.554                                                           | -82.246 | 154.897 | 178.008  | 59.846   | -30.292  | 18.116   | 2.039    | -20.834  |
| Conformer6  | -1279.15801200                     | 2.79580419                | 10.9310                                 | 3.878                                                              | -79.31  | 154.78  | 177.459  | 31.566   | -36.457  | 26.859   | -6.415   | -16.019  |
| Conformer7  | -1279.15800500                     | 2.77515118                | 10.9293                                 | 3.926                                                              | -78.782 | 153.309 | 177.545  | 31.75    | -36.739  | 27.139   | -6.59    | -16.015  |
| Conformer8  | -1279.15796200                     | 2.65158775                | 12.5069                                 | 4.344                                                              | -81.073 | 154.429 | 176.76   | 32.373   | -37.373  | 27.468   | -6.529   | -16.447  |
| Conformer9  | -1279.15795800                     | 2.64037702                | 6.5169                                  | -172.448                                                           | -82.232 | 154.292 | 179.353  | 30.499   | -30.342  | 18.261   | 1.836    | -20.648  |
| Conformer10 | -1279.15791500                     | 2.52281441                | 7.8114                                  | -172.917                                                           | -81.541 | 154.684 | 178.19   | 30.176   | -29.97   | 18.004   | 1.879    | -20.468  |
| Conformer11 | -1279.15781500                     | 2.26925765                | 5.1614                                  | -170.53                                                            | -86.917 | 153.504 | 177.346  | 33.723   | -33.628  | 20.387   | 1.719    | -22.572  |
| Conformer12 | -1279.15772300                     | 2.05855481                | 13.7801                                 | 4.2                                                                | -79.496 | 154.916 | 176.881  | 31.871   | -37.151  | 27.642   | -7.035   | -15.814  |
| Conformer13 | -1279.15770400                     | 2.01753998                | 8.3455                                  | 3.512                                                              | -81.193 | -28.105 | -177.812 | 32.361   | -36.72   | 26.421   | -5.464   | -17.112  |

|             |                |            |         |          |         |         |          |        |         |        |        |         |
|-------------|----------------|------------|---------|----------|---------|---------|----------|--------|---------|--------|--------|---------|
| Conformer14 | -1279.15767700 | 1.96065755 | 5.1522  | -170.208 | -86.394 | 153.91  | 177.6    | 33.493 | -33.659 | 20.655 | 1.279  | -22.147 |
| Conformer15 | -1279.15756000 | 1.73212807 | 9.7505  | 12.897   | -91.14  | 154.666 | 177.338  | 32.641 | -33.236 | 20.844 | 0.606  | -21.173 |
| Conformer16 | -1279.15752900 | 1.67617568 | 9.7577  | 12.757   | -90.437 | 154.79  | 177.186  | 32.551 | -33.191 | 20.854 | 0.538  | -21.074 |
| Conformer17 | -1279.15742100 | 1.49498874 | 7.5951  | 4.217    | -79.003 | -27.526 | -177.594 | 31.29  | -36.44  | 27.064 | -6.843 | -15.553 |
| Conformer18 | -1279.15738000 | 1.43145372 | 8.4981  | 4.245    | -80.608 | -28.347 | -177.15  | 31.629 | -36.286 | 26.438 | -5.955 | -16.341 |
| Conformer19 | -1279.15737900 | 1.42993829 | 8.7994  | 4.529    | -82.05  | 152.858 | 175.989  | 32.954 | -37.887 | 27.75  | -6.464 | -16.866 |
| Conformer20 | -1279.15736500 | 1.40889000 | 7.2791  | -170.052 | -84.046 | -27.779 | -179.098 | 32.501 | -32.811 | 20.21  | 1.031  | -21.333 |
| Conformer21 | -1279.15734600 | 1.38081915 | 8.5042  | 3.915    | -80.778 | -28.379 | -177.398 | 31.934 | -36.576 | 26.596 | -5.929 | -16.544 |
| Conformer22 | -1279.15732300 | 1.34758590 | 5.9159  | 4.935    | -78.149 | -27.92  | -177.228 | 31.189 | -37.028 | 28.108 | -8.014 | -14.737 |
| Conformer23 | -1279.15721800 | 1.20574339 | 6.8370  | 12.555   | -90.425 | 154.631 | 177.253  | 32.497 | -32.985 | 20.554 | 0.81   | -21.207 |
| Conformer24 | -1279.15721400 | 1.20064559 | 7.6057  | 4.62     | -80.305 | -28.143 | -177.458 | 32.019 | -37.135 | 27.458 | -6.787 | -16.038 |
| Conformer25 | -1279.15720500 | 1.18925420 | 5.9903  | 3.744    | -80.935 | -28.491 | -177.344 | 32.074 | -36.59  | 26.508 | -5.756 | -16.736 |
| Conformer26 | -1279.15714100 | 1.18925420 | 9.3605  | 4.276    | -77.968 | -27.479 | -177.297 | 31.037 | -36.672 | 27.67  | -7.642 | -14.882 |
| Conformer27 | -1279.15713400 | 1.10309683 | 8.0443  | 12.314   | -90.783 | 153.222 | 177.425  | 33.237 | -34.026 | 21.54  | 0.256  | -21.331 |
| Conformer28 | -1279.15712300 | 1.09031872 | 6.3277  | -171.984 | -81.833 | 154.82  | 178.388  | 30.76  | -31.456 | 19.83  | 0.343  | -19.863 |
| Conformer29 | -1279.15711100 | 1.07654773 | 7.4730  | -170.08  | -83.735 | -28.796 | -178.569 | 32.442 | -33.185 | 20.865 | 0.318  | -20.84  |
| Conformer30 | -1279.15708100 | 1.04287641 | 11.0267 | 12.45    | -90.565 | 154.9   | 177.356  | 32.588 | -33.336 | 21.051 | 0.357  | -20.977 |
| Conformer31 | -1279.15706700 | 1.02752556 | 5.6968  | -171.645 | -79.531 | -26.81  | -179.607 | 30.626 | -31.461 | 19.901 | 0.15   | -19.636 |
| Conformer32 | -1279.15701000 | 0.96732360 | 9.6433  | -170.626 | -84.75  | 154.602 | 177.906  | 32.227 | -32.33  | 19.761 | 1.395  | -21.428 |
| Conformer33 | -1279.15700700 | 0.96425464 | 9.6433  | 4.865    | -79.122 | -28.789 | -176.825 | 31.377 | -36.812 | 27.568 | -7.32  | -15.299 |
| Conformer34 | -1279.15695900 | 0.91645474 | 9.2865  | -169.534 | -84.422 | -27.317 | -179.049 | 32.379 | -33.319 | 21.169 | -0.052 | -20.571 |
| Conformer35 | -1279.15695800 | 0.91548452 | 6.7779  | -171.356 | -82.268 | 153.853 | 179.034  | 31.428 | -32.728 | 21.177 | -0.623 | -19.657 |
| Conformer36 | -1279.15689600 | 0.85729458 | 8.6034  | -170.132 | -85.569 | 153.411 | -179.818 | 32.805 | -33.005 | 20.231 | 1.281  | -21.716 |
| Conformer37 | -1279.15688700 | 0.84916081 | 12.0283 | 3.931    | -82.023 | 153.88  | 177.72   | 33.075 | -37.619 | 27.186 | -5.76  | -17.401 |
| Conformer38 | -1279.15686200 | 0.82696965 | 5.6947  | -171.096 | -82.727 | 154.418 | 177.761  | 31.508 | -33.04  | 21.605 | -1.014 | -19.463 |
| Conformer39 | -1279.15684500 | 0.81221184 | 9.3748  | 11.487   | -91.737 | 154.783 | 177.15   | 32.743 | -32.909 | 20.221 | 1.309  | -21.674 |
| Conformer40 | -1279.15679100 | 0.76705854 | 7.3595  | -170.138 | -85.506 | 154.067 | 178.014  | 33.061 | -33.416 | 20.64  | 1.023  | -21.699 |
| Conformer41 | -1279.15678100 | 0.75897656 | 5.8700  | -171.742 | -82.677 | 154.286 | 177.643  | 31.176 | -31.666 | 19.763 | 0.694  | -20.348 |
| Conformer42 | -1279.15670000 | 0.69657383 | 7.6156  | -169.538 | -83.9   | -28.409 | -178.713 | 32.12  | -33.097 | 21.07  | -0.119 | -20.361 |
| Conformer43 | -1279.15668100 | 0.69657383 | 8.3135  | -171.35  | -80.052 | -26.936 | -179.325 | 30.15  | -31.243 | 20.044 | -0.33  | -19.024 |
| Conformer44 | -1279.15667000 | 0.67478699 | 9.6358  | 4.091    | -81.838 | 154.139 | 177.361  | 32.967 | -37.581 | 27.244 | -5.904 | -17.226 |
| Conformer45 | -1279.15666100 | 0.66838481 | 12.3637 | 11.538   | -90.866 | 155.267 | 177.139  | 32.629 | -32.982 | 20.448 | 0.998  | -21.406 |
| Conformer46 | -1279.15659900 | 0.62590100 | 9.0037  | -169.576 | -83.957 | -27.802 | -179.535 | 32.477 | -33.131 | 20.735 | 0.47   | -20.97  |

|             |                |            |         |          |         |         |          |        |         |        |        |         |
|-------------|----------------|------------|---------|----------|---------|---------|----------|--------|---------|--------|--------|---------|
| Conformer47 | -1279.15655300 | 0.59613546 | 13.8152 | 3.956    | -81.412 | 153.965 | 177.561  | 32.564 | -37.37  | 27.294 | -6.205 | -16.792 |
| Conformer48 | -1279.15653600 | 0.58549704 | 12.9746 | 3.907    | -82.207 | 154.239 | 177.143  | 32.742 | -37.114 | 26.736 | -5.529 | -17.326 |
| Conformer49 | -1279.15653200 | 0.58302160 | 10.3246 | -171.452 | -84.225 | 154.551 | 178.295  | 31.992 | -32.045 | 19.589 | 1.414  | -21.303 |
| Conformer50 | -1279.15650500 | 0.56658391 | 9.3459  | -170.544 | -84.891 | 154.554 | 177.422  | 32.29  | -32.307 | 19.654 | 1.548  | -21.559 |
| Conformer51 | -1279.15649400 | 0.56002069 | 10.4355 | 3.759    | -82.204 | -27.891 | -178.006 | 32.7   | -36.942 | 26.448 | -5.26  | -17.46  |
| Conformer52 | -1279.15645600 | 0.53792720 | 12.3176 | 11.31    | -91.845 | 154.642 | 176.438  | 32.758 | -32.898 | 20.179 | 1.352  | -21.704 |
| Conformer53 | -1279.15645200 | 0.53565288 | 10.2786 | -171.622 | -83.652 | 154.359 | 178.253  | 31.855 | -31.854 | 19.37  | 1.568  | -21.317 |
| Conformer54 | -1279.15643200 | 0.52442471 | 5.4632  | 12.852   | -89.47  | -28.305 | -178.455 | 32.443 | -33.58  | 21.54  | -0.319 | -20.44  |
| Conformer55 | -1279.15641700 | 0.51615831 | 15.1406 | 4.236    | -81.741 | 153.895 | 177.438  | 32.835 | -37.567 | 27.355 | -6.103 | -17.018 |
| Others*     | < 0.5          |            |         |          |         |         |          |        |         |        |        |         |

#### Total Population Distribution

|                            | H <sub>2</sub> O (%) | Exp. H <sub>2</sub> O (%) |
|----------------------------|----------------------|---------------------------|
| Total <i>Cis</i> Isomers   | 57.75                | 53                        |
| Total <i>Trans</i> Isomers | 42.25                | 47                        |

<sup>a</sup> angles are in degrees, <sup>b</sup> units in Debye (D). The relative electronic energies and the relative free energies are in Hartrees. The population distributions were calculated using the Boltzmann statistical weights at 25 °C, including all conformers. In the property table, only those conformers are included that contribute 0.5% or more.

**Hydrogen Bonds:** The most stable conformers were studied for internal hydrogen bonding. For the hydrogen bonding characterization, we used a  $\leq 2.5\text{\AA}$  bond length cutoff to ensure that only strong hydrogen bonds were selected.<sup>2</sup> We increased the bond distance cutoff from  $\leq 2.1\text{\AA}$  to  $\leq 2.5\text{\AA}$  to check the sensitivity of the cutoff. However, the results found from both cutoffs remains the same. Based on this criterion we found two types of hydrogen bonds in those conformers of compounds **3** and **4** that contribute to a population distribution greater  $> 0.5\%$  (Table 1-2). For compound **3**, the first major hydrogen bond exists between OH-6' and OH-6 (6'-OH-----OH-6). The average hydrogen bond distance is  $\approx 1.9\text{\AA}$ . This hydrogen bond was found in prolyl amide *trans* conformers **10**, **16**, **23**, **30**, **37** and **56** (Table 5). The second type of hydrogen bond in compound **3**, exists between OH-6' and *N*-terminal carbonyl (6'-OH-----O=C-N) and is found in the *cis* conformers only. Conformers **22**, **25**, **32**, **46**, **48**, **53**, and **64** possess this hydrogen bond (Table 5). The bond distance of this hydrogen bond is  $\approx 1.8\text{\AA}$ . In addition, a third type of hydrogen bond is found between OH-2 and the *C*-terminal carbonyl (2-OH---O=C'-C $^{\alpha}$ ) with a bond distance of  $1.9\text{\AA}$ . This hydrogen bond was found in only one out of 43 *trans* conformers.

For Compound **4**, the first major hydrogen bonding exists between 6'-OH and the *N*-terminal carbonyl (6'-OH---O=C'-N) and the bond distance is  $\approx 1.8\text{\AA}$ . These conformers with this kind of hydrogen bond are conformers **1**, **2**, **4**, **6**, **7**, **8**, **12**, **13**, **17**, **18**, **19**, **21**, **22**, **25**, **33**, **37**, **44**, **47**, **48**, **51**, and **55** (Table 6). All these above-mentioned twenty-one conformers favor a *cis* prolyl amide structure. The second hydrogen bond exists between 6'-OH and the *C*-terminal carbonyl (C $^{\delta}$ -CH<sub>2</sub>-OH---O=C'-C $^{\alpha}$ ) and is found in both *cis* and *trans* conformations. The conformers with this kind of hydrogen bond that favor the *cis* prolyl amide structure are conformers **15**, **16**, **23**, **30**, **39**, and **52** and the conformers that favor the *trans* structure are also conformers **3**, **5**, **10**, **32**, **36**, **40**, **49**, **50**, and **53** (Table 6). The bond distance of this hydrogen bonding is  $\approx 1.9\text{\AA}$ .

Figure 48 shows the most stable *cis/trans* prolyl amide conformer for compound 3 while the most stable *cis/trans* prolyl amide conformer for compound 4 is shown in Figure 49.

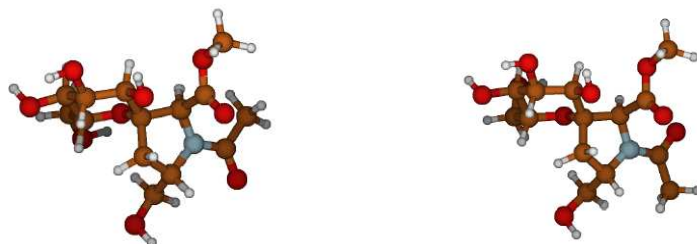

**Figure 48.** The most stable conformers of compound 3: the most stable *cis* conformer is shown on the left while the most stable *trans* conformer is shown on the right. In these two conformers no intramolecular hydrogen bond was identified

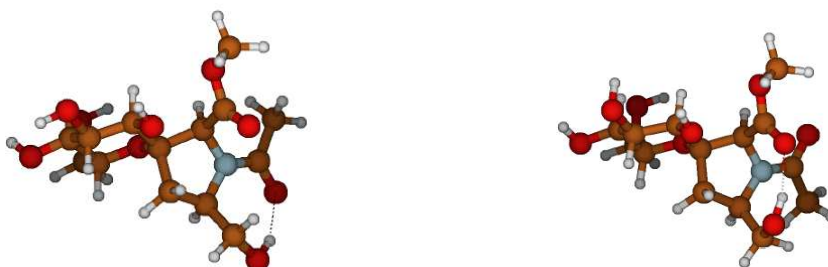

**Figure 49.** The most stable conformers of compound 4: the most stable *cis* conformer is shown on the left while the most stable *trans* conformer is on the right. The intramolecular hydrogen bonds between 6'-OH  $\cdots$  O=C-N (*cis* isomer) and 6'-OH  $\cdots$  O=C-C $^{\alpha}$  are indicated.

## References

- (1) Frisch, M. J.; Trucks, G. W.; Schlegel, H. B.; Scuseria, G. E.; Robb, M. A.; Cheeseman, J. R.; Montgomery, J. A.; Vreven, T.; Kudin, K. N.; Burant, J. C.; Millam, J. M.; Iyengar, S. S.; Tomasi, J.; Barone, V.; Mennucci, B.; Cossi, M.; Scalmani, G.; Rega, N.; Petersson, G. A.; Nakatsuji, H.; Hada, M.; Ehara, M.; Toyota, K.; Fukuda, R.; Hasegawa, J.; Ishida, M.; Nakajima, T.; Honda, Y.; Kitao, O.; Nakai, H.; Klene, M.; Li, X.; Knox, J. E.; Hratchian, H. P.; Cross, J. B.; Bakken, V.; Adamo, C.; Jaramillo, J.; Gomperts, R.; Stratmann, R. E.; Yazyev, O.; Austin, A. J.; Cammi, R.; Pomelli, C.; Ochterski, J. W.; Ayala, P. Y.; Morokuma, K.; Voth, G. A.; Salvador, P.; Dannenberg, J. J.; Zakrzewski, V. G.; Dapprich, S.; Daniels, A. D.; Strain, M. C.; Farkas, O.; Malick, D. K.; Rabuck, A. D.; Raghavachari, K.; Foresman, J. B.; Ortiz, J. V.; Cui, Q.; Baboul, A. G.; Clifford, S.; Cioslowski, J.;

- Stefanov, B. B.; Liu, G.; Liashenko, A.; Piskorz, P.; Komaromi, I.; Martin, R. L.; Fox, D. J.; Keith, T.; Al-Laham, M. A.; Peng, C. Y.; Nanayakkara, A.; Challacombe, M.; Gill, P. M. W.; Johnson, B.; Chen, W.; Wong, M. W.; Gonzalez, C.; Pople, J. A. Gaussian 03, revision D.02; Gaussian, Inc.: Wallingford CT, 2004.
- (2) Morozov, A.; Kortemme, T.; Tsemekhman, K.; Baker, D. *Proc. Natl. Acad. Sci. U S A* **2004**, *101*, 6946.
